# Supplementary material for: Hydrological response in the Danube lower basin to some internal and external climate forcing factors
Source: Copernicus journal article supplement (doi:10.5194/hess-2016-304), 2016-06-28
Supplement: Supplementary file [file hess-2016-304-AC1-supplement.pdf]

# Hydrological response in the Danube lower basin to some internal and external climate forcing factors

Ileana Mares<sup>1</sup>, Venera Dobrica<sup>1</sup>, Crisan Demetrescu<sup>1</sup>, Constantin Mares<sup>2</sup>

<sup>1</sup> Institute of Geodynamics, Romanian Academy, Bucharest, Romania

<sup>2</sup> National Institute of Hydrology and Water Management, Bucharest, Romania

**Abstract.** The present study aims at investigating the influence of natural forcing factors on Danube river discharge: temperature, precipitation, a drought index, climate indices that characterize internal climate variability, Earth's magnetic field and external solar forcing. We test the validity of hypothesis that discharge variability is influenced both internal and external forcing factors.

Of the internal factors, we tested the predictors from the fields of precipitation, temperature, pressure and geopotential at 500hPa. From the external factors, we considered the indices of solar/geomagnetic activity. Our analysis was achieved separately for each season, for two time periods 1901-2000 and 1948-2000.

We applied developments in empirical orthogonal functions (EOFs), cross correlations, power spectra, filters, composite maps. In analysis of the correlative results, we took into account, the serial correlation of time series.

For the atmospheric variables simultaneously, the most significant results (confidence levels of 95%) are related to the predictors, considering the difference between standardized temperatures and precipitation (TPP), except for winter season, when the best predictors are the first principal component (PC1) of the precipitation field and the Greenland-Balkan-Oscillation index (GBOI). The GBOI is better predictor for precipitation, in comparison with North Atlantic Oscillation index (NAOI) for the middle and lower Danube basin.

The significant results, with the confidence level more than 95%, were obtained for the PC1-precipitation and TPP during winter/spring, which can be considered good predictors for spring/summer discharge in the Danube lower basin.

Simultaneous, the significant signature of geomagnetic index (aa), was obtained for the smoothed data by band pass filter. For the different lags, the atmospheric variables are associated with the solar/geomagnetic variability after about 2-3 years. The possible external signals in the terrestrial variables are revealed also by power spectra and composite maps. The power spectra for the terrestrial variables show statistical significant peaks that can be associated with the interannual variability, Quasi-Biennial Oscillation influence and solar/geomagnetic variability.

The filtering procedures led to improvement of the correlative analyses between solar or geomagnetic activity and terrestrial variables, under the condition of a rigorous test of the statistical significance.

**Keywords:** NAO, GBOI, serial correlation, low and band pass filter, atmospheric blocking, Danube basin, climate changes

## 1 Introduction

Climatic system is a closed system, being influenced mainly by external factors, whose action is modulated by the internal mechanisms. Therefore, it is difficult to assess climatic system response to various external factors, the discrimination action of each is

49 sometimes even impossible. The main external factors as is known are: solar activity in its  
50 various forms and the greenhouse gases that cause climate variability. Quantifying the impact  
51 of each factor on the climate system is subject to various uncertainties. As shown in Cubasch  
52 et al. (1997), as well as in Benestad and Schmidt (2009) it is difficult to distinguish between  
53 anthropogenic signal and the solar forcing in the climate change, especially if we wanted to  
54 assess the respective contributions of the greenhouse or the solar forcing to the recent  
55 warming. An explanation of this shortcoming is related to the limitations of simulation  
56 climate models and lack of long data on many parts of the Earth, to estimate the impact of  
57 solar activity.

58 In Brugnara et al. (2013) are reviewed recent studies on the impact of solar activity /  
59 geomagnetic on the climate. After a statistical reconstruction of the main atmospheric fields  
60 for more than 250 years, the authors performed an analysis of the solar signal of 11 years in  
61 different reconstructed terrestrial datasets, and they found that there was a robust response of  
62 the tropospheric late-wintertime circulation to the sunspot cycle, independently from the data  
63 set. This response is particularly significant over Europe.

64 There were many preoccupations regarding the impact of greenhouse gases, resulting  
65 from climate modeling under various scenarios, on the water regime of the Danube. We  
66 mention only some of these studies. In Mares et al. (2011, 2012) were processed climate  
67 variables obtained from four global models of climate change: CNRM, ECHAM5, EGMAM  
68 and IPSL, under A1B scenario. It was found for Danube lower basin, that the probability to  
69 have extreme events (hydrological drought and great discharges) increases in the second half  
70 of the 21<sup>st</sup> century comparing to the first half. A more complex methodology for post-  
71 processing of outputs of climate models is found in Papadimitriou et al. (2016), where an  
72 analysis of the changes in future drought climatology was performed for five major European  
73 basins (including Danube) and the impact of global warming was estimated.

74 Regarding internal factors that influence climate at regional or local scale, best known  
75 index is related to the North Atlantic Oscillation (NAO). After Hurrell et al. (2003), NAO is  
76 an internal variability mode of the atmosphere, and it is highlighted by a north-south dipole of  
77 the pressure, characterized by simultaneous anomalies but with the opposite signs between  
78 temperate and high latitudes over the Atlantic sector.

79 For the south - eastern European zone, only NAO is not a good enough predictor for  
80 Danube discharge. Rimbu et al. (2002) showed that there is an out-of-phase relationship  
81 between the time series of the Danube river discharge anomalies and the NAO index. Also,  
82 Rimbu et al. (2005) was found that spring Danube discharge anomalies are significantly  
83 related to winter Sea Surface Temperature (SST) anomalies. In Mares et al. (2002) it was  
84 found that NAO signal in climate events in the Danube lower basin is relatively weak, in  
85 comparison with other regions.

86 However, we must note that NAO is a very good predictor for some regions. Thus, for  
87 example NAOI is a significant predictor for : Seine river (Massey et al., 2010; El - Janyani et  
88 al., 2012), northeastern Algeria (Turki, et al., 2016), southern Sweden (Drobyshev et al.,  
89 2011), the northern Italy (Zanchettin et al., 2008).

90 The recent research (Valty et al., 2015) warns that for the predictor's selection such as  
91 NAO, need to consider the dynamics of the total oceanic and hydrological system over wider  
92 areas. In fact all climate system needs to be considered. In Hertig et al. (2015) are described  
93 the mechanisms underlying the non-linearity and non-stationarity of the climate system  
94 components, with a focus on NAO and the consequences of climate non-stationarities are  
95 discussed.

96 In the present study, in comparison with the NAO influence on climate variables in the  
97 Danube basin, we analysed the atmospheric index Greenland-Balkan-Oscillation (GBO),  
98 which reflect the baric contrast between the Balkan zone and the Greenland zone. The GBO

99 index was introduced first time in Mares et al. (2013b) and in the present study it is shown in  
100 detail, the GBOI informativity in comparison with NAOI, for the Danube basin.

101 It was found that solar activity plays an essential role in modulating the blocking  
102 features with the strongest signal in the Atlantic sector (Barriopedro et al., 2008; Rimbu and  
103 Lohmann, 2011). Therefore, in the present paper we consider, the indices of blocking type  
104 circulation, both on the Atlantic and European sector.

105 In this paper, except for the highlighting the atmospheric circulation of blocking type  
106 taking into account the Quasi-Biennial Oscillation (QBO) phases and solar minimum or  
107 maximum (number Wolf), we did not investigate any further interaction between internal and  
108 external factors. This interaction was developed in other papers such as Van Loon and Meehl  
109 (2014).

110 The main aim of our work was to select predictors from the terrestrial and solar  
111 /geomagnetic variables with a significant informativity for predictand, i.e. discharge in the  
112 Danube lower basin. We obtained this informativity by applying robust tests for the statistical  
113 significance. The solar and geomagnetic variables, as well as the smoothing procedures  
114 through various filters, respectively low pass filter and band pass filters applied in this  
115 investigation, shows strong serial correlations. Therefore, all correlative analyzes were  
116 performed through rigorous testing of statistical significance. The number of observations was  
117 reduced to the effective number of degrees of freedom, corresponding to the independent  
118 observations.

119 This paper is organized as follows: Sect. 2 shows data processed at regional scale (2.1)  
120 and large scale (2.2), as well as the indices that define solar and geomagnetic activity (2.3).

121 In Section 3, we describe the methodology used. There are many investigations related  
122 to solar / geomagnetic signal in the Earth's climate, some of them use smoothing of data, both  
123 related to solar activity and the terrestrial variables. This smoothing induces a high serial  
124 correlation, which produces very high correlations between time series. Therefore, in Sect. 3  
125 we focused on testing the statistical significance of solar / geomagnetic signal in climate  
126 variables, taking into account the high autocorrelation induced by the smoothing processes.  
127 We also briefly described the procedure of testing of confidence levels of the peaks of the  
128 power spectra.

129 Section 4 contains the results and their discussion. Concerning the link between  
130 atmospheric circulation at the large scale and the climate variables at local or regional scales  
131 and described in 4.1, we demonstrated that GBOI is a more significant predictor than NAOI  
132 for the climate variables in the Danube middle and lower basin. In 4.2, for the period 1901-  
133 2000, we considered several predictors depending on climatic variables in the Danube basin,  
134 as well the indices of large-scale atmospheric circulation and we tested predictor's weight for  
135 the discharge in the lower basin. In subsection 4.3, are presented the results obtained from the  
136 analysis of solar/geomagnetic signal simultaneously with the terrestrial variables (4.3.1) and  
137 with some lags (4.3.2) and QBO role in modulating these influences (4.3.3). The conclusions  
138 are presented in the Sect.5.

139  
140

## 141 **2 Data**

142  
143

### 143 **2.1 Regional scale**

144  
145

145 Since the Danube discharge estimation has great importance for the economic sector  
146 of Romania, in the present investigation we focused on predictors for Danube lower basin  
147 discharge. The lower basin Danube discharge was evidenced by Orsova station (Q\_ORS),  
148 located at the entrance of the Danube in Romania and representing an integrator of the upper

149 and middle basin. Our analysis was achieved separately for each season, for the two time  
 150 series of 100 values (1901-2000) and respectively 53 values (1948-2000). For the period  
 151 1901-2000, in the Danube upper and middle basin (DUMB), fields of precipitation (PP), mean  
 152 temperature (T), diurnal temperature range (DTR), maximum and minimum temperatures  
 153 (Tmx, Tmn), cloud cover (CLD) were considered at 15 meteorological stations upstream of  
 154 Orsova. The selection of stations was done according to their position on the Danube or on the  
 155 tributaries of the river (Fig.1). The values of monthly precipitation and temperature (CRU  
 156 TS3.10.01) were obtained accessing (<http://climexp.knmi.nl>). Data-sets are calculated on  
 157 high-resolution (0.5 x 0.5 degree) grids by Climatic Research Unit (CRU). In order to obtain  
 158 the grid point nearest to the respective station we selected "half grid points".

159 The stations position in relation to Orsova is given in Figure 1. For each station a  
 160 simple drought index (TPPI) was calculated, which is calculated by the difference between  
 161 standardized temperatures and precipitation. All analyses were achieved using the seasonal  
 162 averages for all variables considered in this study.

163

164

## 165 2.2 Large scale

166

167 In order to see the influence of large-scale atmospheric circulation on the variables at  
 168 the regional scale, we considered the seasonal mean values of sea level pressure field (SLP)  
 169 on the sector ( $50^{\circ}\text{W}$ - $40^{\circ}\text{E}$ ,  $30^{\circ}$ - $65^{\circ}\text{N}$ ). We had to extract SLP data from the National Center  
 170 for Atmospheric Research (NCAR), (<http://rda.ucar.edu/datasets/ds010.1>). As mentioned in  
 171 the associated documentation, this dataset contains the longest continuous time series of  
 172 monthly grided Northern Hemisphere sea-level pressure data in the DSS archive. The 5-  
 173 degree latitude/longitude grids, computed from the daily grids, begin in 1899 and cover the  
 174 Northern Hemisphere from  $15^{\circ}\text{N}$  to the North Pole. The accuracy and quality of this data is  
 175 discussed in Trenberth and Paolino (1980).

176 We defined a new index started from tests achieved using correlative analysis between  
 177 the first principal component (PC1) of the Empirical Orthogonal Functions (EOFs)  
 178 development of the precipitation field defined at 15 stations from Danube basin and each grid  
 179 point where SLP is defined. By determining the areas with nuclei of correlations with the  
 180 opposite signs (positive in Greenland and negative in Balkans) and by considering the  
 181 normalized differences between SLP at Nuuk and Novi Sad (Fig.2), we obtained this index,  
 182 which we called *Greenland-Balkan-Oscillation index* (GBOI). This index was introduced by  
 183 Mares et al. (2013b) and tested in the previous works of the authors (Mares *et al.*, 2014a,  
 184 2015a,b, Mares et al., 2016a,b).

185 The NAOI were download from <http://www.ldeo.columbia.edu/res/pi/NAO/>

186 For 1948-2000 period, beside of atmospheric variables taken over 1901-2000, we  
 187 considered blocking type indices. These indices are calculated in according with the relation  
 188 (1).

189 For the geopotential at 500 hPa (1948-2000) provided by *British Atmospheric Data*  
 190 *Centre (BADC)* three sectors were taken into account: Atlantic-European (AE) on the domain  
 191 ( $50^{\circ}\text{W}$ -  $40^{\circ}\text{E}$ ;  $35^{\circ}\text{N}$  -  $65^{\circ}\text{N}$ ), Atlantic (A) defined in ( $50^{\circ}\text{W}$  -  $0^{\circ}$ ,  $35^{\circ}\text{N}$  -  $65^{\circ}\text{N}$ ) and European  
 192 (E) in the region ( $0^{\circ}$  -  $40^{\circ}\text{E}$ ;  $35^{\circ}\text{N}$  -  $65^{\circ}\text{N}$ ).

193

## 194 2.3 Solar / geomagnetic data

195

196 For this 100 year period the solar/geomagnetic activities were quantified by Wolf number and  
 197 *aa* index. For the period 1948-2000, solar forcing is quantified by 10.7cm solar radio flux,

198 which is the solar flux density measured at a wavelength of 10.7cm. Details on **the 10.7 cm**  
 199 **solar radio flux and its applications are found in** Tapping (2013).

200 Since the 10.7cm flux is a more objective measurement, and always measured on the  
 201 same instruments, this proxy "sunspot number" should have a similar behaviour but smaller  
 202 intrinsic scatter than the true sunspot number. The solar data were obtained from  
 203 ([ftp://ftp.ngdc.noaa.gov/STP/SOLAR\\_DATA/](ftp://ftp.ngdc.noaa.gov/STP/SOLAR_DATA/)).

204 The Quasi-Biennial Oscillation (QBO) is also used in this study in order to make the link  
 205 between solar forcing, internal climate variability and discharge variability.

206 The QBO values were downloaded from Free University of Berlin  
 207 (<http://www.geo.fu-berlin.de/met/ag/strat/produkte/qbo/qbo.dat>).

208

209

### 210 **3 Methodology**

211

212 The time series of the variables considered in the 15 stations were developed in  
 213 empirical orthogonal functions (EOFs) and only the first principal component (PC1) was kept.

214 The analysis of the low frequency components of the atmosphere, based on  
 215 decomposition in multivariate EOF (MEOF), was used by the authors of the present paper in  
 216 Mares et al. (2009, 2015, 2016a, b).

217 The blocking index ( $I_B$ ) at the 500 hPa geopotential field was estimated in according  
 218 with Lejenas and Okland (1983). Such a blocking event can be identified when the averaged  
 219 zonal index computed as the 500-hPa height difference between 40° and 60°N, is negative  
 220 over 30° in longitude. Taking into account the above definition, in the present study, we  
 221 calculated for each longitude  $\lambda$ , three indices for the regions: Atlantic-European (AEBI),  
 222 Atlantic (ABI) and Europe (EBI) after the formula:

223

$$224 \quad IB(\lambda) = \Phi(\lambda, 57.50 N) - \Phi(\lambda, 37.50 N) \quad (1)$$

225

226 where  $\Phi$  is the 500 hPa geopotential field, and blocking index  $I_B$  is a mean for  $\lambda$  longitudes of  
 227  $IB(\lambda)$ . In our case  $IB$  positive reflects a blocking type circulation.

228 In the preprocessing analyses, low and band pass filters were applied.

229 **Low pass filters** were applied to eliminate oscillations due to other factors such as El  
 230 Niño–Southern Oscillation (ENSO) than the possible influence of solar/ geomagnetic  
 231 activities. The Mann filter (Mann, 2004, 2008) was applied with three variants that eliminate  
 232 frequencies corresponding to periods lower than 8, 10 and 20 years.

233 Besides the low pass filters specified above, which were applied only to the terrestrial fields,  
 234 **band pass filters** were applied to both the terrestrial and solar or geomagnetic variables. The  
 235 band pass filters were of the Butterworth type, and the variables have been filtered in the 4–8,  
 236 9–15 and 17–28 years bands. We use Butterworth filters, because, in according with Vlasov  
 237 et al. (2011), and Ault et al. (2012), for these filters their frequency response is nearly flat  
 238 within the passband, and they are computationally efficient, being recursive filters.

239 In Lohmann et al. (2004) the solar variations associated with the Schwabe, Hale, and  
 240 Gleissberg cycles were detected in the spatial patterns in sea-surface temperature and sea-  
 241 level pressure, using band pass filters with frequencies appropriate to each of the solar cycles.  
 242 Significant correlations between global surface air temperature and solar activity were  
 243 obtained by Echer et al. (2009), applying wavelet decomposition.

244 A possible response of climate variables to the solar/geomagnetic activity is  
 245 investigated in the literature, not only simultaneously but also with certain delays, we  
 246 performed cross – correlation between lag -1 and lag 15 years.

247 Explanation of the physical mechanism of correlations with certain lags between solar  
248 activity and climate variables is found in Gray et al. (2013) and Scaife et al. (2013).

249 In order to find the significance level of the correlation coefficient, we have to take  
250 into account the fact that by the smoothing both terrestrial and solar/ geomagnetic variables  
251 present a serial correlation. In this case, we have to estimate the equivalent sample size (ESS).  
252 There are more methods to find the correlations statistical significance among the series pairs  
253 presenting serial correlations. A part of these methods are present in Thiebaut and Zwiers  
254 (1984), Zwiers and Storch (1995), Ebisuzaki (1997).

255 In Mares et al. (2013a), the procedure described by Zwiers and Storch (1995) for ESS  
256 estimation was applied in order to estimate the statistical significance of the climatic signal in  
257 sea level pressure field (SLP) in 21<sup>st</sup> century in comparison with 20-th century.

258 In the present analysis, in order to find the ESS, namely the *number of effectively* independent  
259 observations ( $N_{eff}$ ) is applied a simple formula, which is appropriate for the correlations  
260 involving smoothed data (Bretherton et al., 1999).

$$261 \quad N_{eff} = N \frac{(1 - r_1 r_2)}{(1 + r_1 r_2)} \quad (2)$$

262 where  $r_1$  and  $r_2$  are the lag-1 autocorrelation coefficients corresponding to the two time  
263 series correlated and N number of the observations.

264 In the next phase, the t-statistic is used to test the statistical significance of the  
265 correlation coefficient:

$$266 \quad t = |r| [(N_{eff} - 2)/(1 - r^2)]^{1/2} \quad (3)$$

267 In equation (3),  $r$  is the correlation coefficient between the two variables and  $N_{eff}$  is  
268 effective number used in the testing procedure.

269 According to von Storch and Zwiers (1999), the null hypothesis  $r = 0$ , is tested by  
270 comparing the  $t$  value in equation (3) with the critical values of t distribution with  $n_e - 2$   
271 degrees of freedom.

272 The correlated time series must have a Gaussian distribution. For this reason in the present  
273 study we have also computed nonparametric Kendall correlation coefficient, which measures  
274 correlation of ranked data. Applying the algorithm described in Press et al. (1992), correlation  
275 values and corresponding significance p-levels are obtained. A comparison between the  
276 Pearson and Kendall correlation coefficients is found in Love et al. (2011), where the  
277 statistical significance between sunspots, geomagnetic activity and global temperature, is  
278 tested.

279 Among the statistical methods that might be used to test solar or geomagnetic  
280 activity signal in the climatic variables, in this study we will take into account also the  
281 statistical significance of the amplitude of the power spectra in time series. Testing the  
282 statistical significance of the peaks obtained from an analysis of a time series by power  
283 spectra is usually done by building a reference spectrum (background) and comparing the  
284 amplitude spectrum of the analyzed time series to those of background noise spectrum. This  
285 spectrum is a series based on either white or most often red noise (Ghil et al. 2002, Torrence  
286 and Campo, 1998). All amplitudes above the background noise amplitudes for a given  
287 significance level are considered significant at this level.

288 A significance test requires null hypothesis significance. For spectral analysis, the null  
289 hypothesis is that the time series has no significant peak and its spectral estimate does not  
290 differ from the background noise spectrum. Rejection of the null hypothesis means accepting  
291 peaks of the spectrum series of observations that exceed a certain level of significance. As  
292 shown in Mann and Less (1996) theoretical justifications exist for considering red noise as  
293 noise reference (background) for climate and hydrological time series. Also, Allen and Smith  
294 (1996), shown that an analysis technique, in order to be useful in the geophysical applications,

295 for the null hypothesis must be considered AR(1). If the white noise is null hypothesis, it may  
 296 incorrectly indicate a large number of oscillations, which are not significant.

297 The power spectra achieved in this study were estimated by multitaper method (MTM)  
 298 (Thomson, 1982, Ghil et al., 2002, Mann and Less (1996)). The MTM procedure is a  
 299 nonparametric technique that does not require a priori a model for the generation of time  
 300 series analysis, while harmonic spectral analysis assumes that the data generation process  
 301 include components purely periodic and white noise which are overlapped (Ghil et al., 2002).

302 In this study as reference background spectrum was chosen red noise. In Mann and  
 303 Less (1996) is explained why an AR(1) process is suitable as background noise for the  
 304 periodicities estimated by MTM procedure. The significance of spectrum peaks relative to  
 305 the red noise background is based on the elementary sampling theory (Gilman et al., 1963;  
 306 Perceival and Walden, 1986).

307 In Mares et al. (2016a), more details were given on the estimate of the background  
 308 noise and significance of power spectra peaks, for the applications referring to the influence  
 309 of the Palmer drought indices in the Danube discharge.

310  
 311

## 312 **4 Results and discussions**

313

### 314 **4.1 Connection between atmospheric circulation at the large scale and climate** 315 **events at regional or local scale**

316

317 The atmospheric circulation at the large scale is quantified in this paragraph by North  
 318 Atlantic Oscillation index (NAOI), Greenland Balkan Oscillation Index (GBOI) and indices  
 319 that highlight the blocking type circulation. The direct impact of NAO is less obvious than  
 320 GBO impact for the surrounding areas of the lower Danube basin as revealed in this study and  
 321 in previous investigations (Mares et al., 2013b, 2014, 2015a,b 2016a,b).

322 The high correlations between GBOI and precipitation are stable over time (Table 1).  
 323 From how GBO and NAO indices are defined, they have opposite signs. Temporal evolution  
 324 for winter of the first principal component (PC1) for the precipitation in the Danube basin in  
 325 comparison with GBOI values is given in Fig.3.

326 The details on the stations are given in Fig.4, where are presented the correlation  
 327 coefficients between winter precipitation at 15 stations and NAOI and GBOI for two periods  
 328 1916-1957 and 1958-1999. From this figure, it is clear that the GBOI signal is stronger than  
 329 NAO signal, except for the first stations located in the upper basin of the Danube.

330 Since the Danube discharge estimation in spring season with some anticipation has  
 331 great importance for the economic sector of Romania, the best predictors at the large scale for  
 332 Orsova discharge in spring, with one season anticipation (winter) were revealed, with high  
 333 confidence level (> 99%): GBOI as well as the atmospheric circulation of blocking type,  
 334 quantified by European blocking index (EBI). The Figure 5 shows spring Orsova discharge  
 335 (standardized) in comparison with European blocking index ( $R = -0.54$ ) and GBOI ( $R = 0.53$ )  
 336 for winter in the period 1948-2000. The opposite signs of the Orsova discharge correlations  
 337 with EBI and GBOI are due to the definitions of the two indices. The negative correlations  
 338 between discharge and EBI can be explained as follows. As shown in Davini et al. (2012), the  
 339 midlatitude traditional blocking localized over Europe, uniformly present in a band ranging  
 340 from the Azores up to Scandinavia, leads to a relatively high pressure field in most of Europe.  
 341 This field of high pressure, which defines a positive blocking index, and that is not favorable  
 342 for precipitation, leads to in low discharge of the Danube at Orsova. A positive correlation  
 343 coefficient between the Danube discharge at Orsova and GBOI, means that a positive GBO  
 344 index lead to a low pressure in the Danube basin area and therefore a high discharge.

345 The role of the atmospheric circulation of blocking type on hydrological events in the  
 346 Danube Basin is described in many papers, including Mares et al. (2006), Blöschl et al.  
 347 (2013).

348  
 349

#### 350 **4.2 Testing predictor variables for estimating the discharge in the Danube lower basin** 351 **(1901-2000)**

352

353 To underline the contribution of the nine predictors, defined at the 15 stations in the  
 354 Danube basin, described in Section 2, we represented in Figure 6 the correlation coefficients  
 355 between Danube discharge at Orsova (lower basin) and these predictors for each of the four  
 356 seasons. PC1 in Fig. 6 represents the first principal component of EOFs development of the  
 357 respective fields. If we take into account the confidence level at 99%, of correlation  
 358 coefficients for 100 values, it should exceed 0.254. There are many predictors that are  
 359 statistically significant at this level of confidence, but we take into consideration only those  
 360 having the highest correlation coefficients. As can be seen from Figure 6, the greatest  
 361 contribution to the Danube discharge in seasons of spring, summer and fall, brings the  
 362 drought index (depending on precipitation and average temperature), with the correlation  
 363 coefficients ( $r$ ) of -0.450 and -0.730 for spring and summer and respectively -0.700 for fall.  
 364 In winter season, the precipitation field in the upper and middle basin has most important  
 365 contribution (predictor) to the discharge in lower Danube basin ( $r = 0.500$ ). As the second  
 366 contribution is GBOI ( $r = 0.430$ ).

367 Also, it is revealed that for the spring season, where contribution drought index TPPI  
 368 is lower than in summer and autumn season, the GBOI and DTR can be considered good  
 369 predictors with  $r = 0.420$  and respectively -0.417.

370 Regarding consideration of the predictors with some anticipation to the Danube  
 371 discharge, the significant results obtained with an anticipation of a season, are presented in the  
 372 Fig. 7. For spring discharge, the best predictor is clearly drought index (TPPI), taken in winter  
 373 ( $r = -0.62$ ). Also, TPPI in spring is a significant predictor ( $r = -0.55$ ) for summer discharge.  
 374 Besides spring TPPI for summer discharge, the spring precipitation field quantified by PC1,  
 375 also is a important predictor ( $r = -0.53$ ).

376 The results obtained in this study are consistent with those of Mares et al. (2016a),  
 377 where the Palmer drought indices were found good predictors for the discharge in lower  
 378 basin.

379  
 380

#### 381 **4.3 Solar/geomagnetic signature in the climate fields in Danube basin**

382

383 Solar activity was represented by Wolf numbers for the period 1901-2000 and by 10.7-  
 384 cm solar flux for the period 1948-2000. Although the solar flux is closely correlated with  
 385 Wolf numbers, these values are not identical, the correlation coefficient varying with the  
 386 season (0.98-0.99). The geomagnetic activity was quantified by *aa* index for the two periods  
 387 analyzed (1901-2000 and 1948-2000). Regarding the link between solar activity and  
 388 geomagnetic, details are found in Demetrescu and Dobrica (2008).

389 Solar/geomagnetic signal was tested by: correlative analyses (simultaneous and cross  
 390 correlation), composite maps and spectral analyses. Before correlative analysis, data were  
 391 filtered using low and band pass filters for the terrestrial variables and only band pass filters  
 392 for the solar / geomagnetic indices.

393 Related to the low pass filter, the Mann filter (Mann, 2004, 2008) was applied with  
 394 three variants that eliminate frequencies corresponding to periods lower than 8, 10 and 20



395 years. The analysis revealed that from the three variants, time series cutoff 8, responded best  
 396 to variations in solar / geomagnetic activities.

397 In many investigations, significant solar signal in the terrestrial variables, have been  
 398 obtained applying band pass filters, for isolating the frequency bands of interest (Lohmann et  
 399 al., 2004, Dima et al, 2005, Prestes et al. 2011, Echer et al. 2012, Wang and Zhao, 2012).

400 In the present study we apply a band pass filter with the three frequency bands: (4-  
 401 8yr), (9-15yr) and (17-28 yr). Because after the filtering process, the time series show a strong  
 402 autocorrelation, to test the statistical significance of the link between the terrestrial and solar  
 403 variables, we use the *t-test*, which takes into account the effective number of independent  
 404 variables and the correlation coefficient between two series. The effective number is  
 405 determined in function of the serial correlations of the two series analyzed. Details are given  
 406 in Section 2. The most significant results were obtained for the filtered terrestrial variables,  
 407 taken with some lags related to solar or geomagnetic activity.

408

#### 409 **4.3.1 Simultaneous correlative analysis**

410

411 The Table 2 presents some of the results that have a confidence level, higher or at least  
 412 of 95%, for the analysis period of 100 years (1901-2000). Here are presented only the results  
 413 simultaneously for three categories of data: non-filtered (UF), smoothed by low pass filter  
 414 (LPF), eliminating, the periods less than or equal to 8 years, only for terrestrial variables, and  
 415 band pass filter (BPF) applied for both time series (terrestrial and solar / geomagnetic  
 416 indices).

417 Since not all variables have a normal distribution, the Kendall's coefficient was  
 418 associated to Pearson's coefficient. There are cases when the difference between the two  
 419 correlation coefficients is relatively high and this difference may be due to statistical  
 420 distribution that deviates from normal.

421 As can be seen from Table 2, smoothing time series lead to improved correlation  
 422 coefficients, the most significant results were obtained by band-pass filter with frequency  
 423 corresponding to 9-15 yr. Also, tests were achieved and for band-pass filter with 17-28 yr, for  
 424 which highest correlation coefficients were obtained. But, it is difficult to take a decision,  
 425 because the effective number is very small (about 5 years), due to serial correlation very high,  
 426 caused by such filters. For such band-pass filters (such as 17-28 yr), much larger sets of data  
 427 are necessary.

428 An example is given in Table 2 to test the correlation between the GBOI and Wolf  
 429 number during fall season. The results presented in Table 2, related to the significant  
 430 correlations indicated by Pearson coefficients ( $r$ ), are supported by Kendall correlation  
 431 coefficients ( $\tau$ ), and their levels of significance ( $p$ ). Bold lines means there are at least two  
 432 situations for the same season (filtered or unfiltered data) having a significant CL.

433 As can be seen from Table 2, highest correlations with *aa*, were obtained during the  
 434 summer season with  $r = 0.796$  for temperature and with  $r = - 0.721$  for precipitation, for a  
 435 smoothing by a BPF with the band (9-15yr). Also, in summer, it is worth mentioning the *aa*  
 436 influence on drought index (TPPI) with correlation 0.787, corresponding filtering with 9-15  
 437 yr. From the definition of this index, it reflects the behavior of both temperature and  
 438 precipitation, but the sign is given by temperature. It can be noted that drought index TPPI,  
 439 which is a combination of temperature and precipitation, responds better to signal *aa*,  
 440 compared to PC1\_PP. Therefore, a geomagnetic activity maximum (minimum) determines a  
 441 situation of drought (wet) in the Danube basin during spring and summer.

442 Regarding solar activity signature in temperatures and precipitation, the highest  
 443 correlation coefficients were found for the fall season (0.699) and respectively for spring (-  
 444 0.538) in the band filter (9-15 yr). From the Table 2, are observed correlations with the

445 number Wolf, with a particularly high confidence level ( $> 99\%$ ) in the case of considering  
 446 time series smoothed by the band (4-8 yr), as atmospheric circulation index GBOI (summer  
 447 and winter).

448 The results obtained in the present investigation, referring to the temperature and  
 449 precipitation variables are in accordance with the ones from Dobrica et al. (2009, 2012),  
 450 where have been analysed the annual mean of long time series (100–150 years) for the  
 451 temperature and precipitation records from 14 meteorological stations in Romania. There are  
 452 some differences, because in this investigation, fields of temperature and precipitation are  
 453 taken on another area, smoothing procedures are different and the analysis is done on each  
 454 season separately. However, the correlations with the geomagnetic *aa* index and Wolf  
 455 numbers have the same sign, ie positive for temperatures and, negative for precipitation  
 456 respectively.

457 Reducing the number of effective observations, when smoothing is applied, is  
 458 discussed in Palamara and Bryant (2004), where they test the statistical significance of the  
 459 relationship between geomagnetic activity and the Northern Annular Mode.

460 Although the results obtained here by the BPF shows the largest correlation  
 461 coefficients, however those obtained by BPF (9-15) must be analyzed together with results  
 462 obtained by other filters. An example is the significance of the correlation coefficients  
 463 between Wolf number and drought index (TPPI), which for spring, for unfiltered data, filtered  
 464 by the low pass filter, and those by BPF (4-8 and 9-15 yr) indicate a confidence level higher  
 465 than 90%. It means that significance of the correlation in this case, does not depend on the  
 466 time series size.

467 Taking into account both possible signals of the geomagnetic and solar activity, we  
 468 can notice that during spring, TPPI has the best response for unfiltered or filtered time series.

469 Considering the importance of the Danube discharge in our study, we analyze solar /  
 470 geomagnetic signals in this variable. Thus, the *aa* is associated with Danube discharge at  
 471 Orsova (Q\_ORs), with the most significance, during the summer season with correlation  
 472 coefficient  $r = - 0.656$ . But considering our criteria above enumerated, ie significant  
 473 correlations in at least two cases, it is clear that we must focus on the discharge behavior in  
 474 fall (Table 2), for which the smoothing by LPF and BPF (9-15) lead to the significant  
 475 association with *aa* impulse.

476 In the following, we present results obtained by analyzing the terrestrial and solar or  
 477 geomagnetic data for the period 1948-2000. Although the time series are relatively short, this  
 478 period was considered, because some of the atmospheric variables, as indices that define the  
 479 blocking type circulation at 500 hPa, are available only since 1948. Also 10.7 cm solar flux  
 480 that defines more clearly solar activity is just beginning in this period. In addition, we wanted  
 481 to see if it improves the relationship between the terrestrial and solar indices, taking separately  
 482 the years with positive or negative phase of Quasi-Biennial Oscillation (QBO).

483 In Table 3 are presented the correlation coefficients, with a high confidence level  
 484 ( $>95\%$ ), obtained from the simultaneous correlative analyses between terrestrial variables and  
 485 geomagnetic (*aa*), and solar activity (flux 10.7cm) indices on the other hand. It is observed  
 486 that due to short time series, the smoothing by the band pass filter (9-15), although leads to  
 487 the correlation coefficients with high confidence level, the number of degrees of freedom is  
 488 quite small.

489 For this period of 53 years (1948-2000), the smoothing by BPF with the band (4-8 yr)  
 490 appears most appropriate, for highlighting a possible solar signal, in the three blocking  
 491 indices.

492 The association between solar or geomagnetic variability with the terrestrial climate  
 493 variability can be emphasized also by the periodicities estimation by means of the power  
 494 spectra. In the present study the power spectra were estimated by means of multitaper method

495 (MTM). For the time series of unfiltered European blocking index (EBI) during winter, the  
 496 power spectra given in the Fig.8a reveals that the most significant periodicity is related to  
 497 QBO (2.4 years), and with an approximately 90% confidence level are the peaks at 10.7 and  
 498 14.2 years, which may be linked to 11-year solar/geomagnetic cycle. In Fig. 8b, which  
 499 represents the power spectrum for EBI in the spring, the only significant peak with a  
 500 confidence level of 95% is situated at 10 years. This is consistent with the results shown in  
 501 Table 3, where during spring, the time series of blocking index EBI, both unfiltered and  
 502 filtered by the band pass filter (4-8) have significant correlations with the aa geomagnetic  
 503 index. Also, in winter (Fig. 8a), the EBI's possible response to solar activity, quantified by the  
 504 Wolf number, is statistically significant with CL almost 99%. If we take only spring season,  
 505 the best significant peak related to QBO (Fig. 8c) is found in blocking index over Atlantic  
 506 European region (AEBI).

507 Graphical representation of unfiltered time series was given to see whether there is  
 508 solar/ geomagnetic signature in the original series. The power spectra of the filtered series  
 509 were not shown, because these series show peaks corresponding to the frequencies remaining  
 510 after filtering procedure.

511 Regarding the period of 53 years (1948-2000), the significant links between the solar  
 512 activity quantified by solar flux 10.7cm and the Danube discharge at Orsova (Q\_ORO), were  
 513 obtained for spring and summer, with different lags. With a delay of of two years, both  
 514 unfiltered and filtered time series of the Danube discharge, indicate statistically significant  
 515 correlations with solar flux.

516 Like in the GBOI case, the discharge is inversely, but well correlated with solar  
 517 activity at some lags. In Fig. 10a, correlation coefficients are shown at the lags between -1 and  
 518 15 yr, for three series, unfiltered (UF), smoothed by low pass filter (LPF) and the band pass  
 519 filter (9-15). It can be observed that, if for the unfiltered data, the correlation is significant  
 520 (95%) at the lag 1, 2 and 3, for the data smoothened by BPF, the significance is situated  
 521 between 95-99% at the lags 2, 3 and 4. Taking into account the discharge smoothed by LPF,  
 522 the most significant correlation (90%) is obtained between discharge taken with two and three  
 523 years delay from solar flux.

524 In the Fig. 10b have been shown the coherent time evolutions of the solar flux and  
 525 discharge, smoothed by BPF (9-15) with a lag of three years, where, the correlation  
 526 coefficient is highest (-0.769) and CL is 99%.

527 From the above results, where the correlation between Danube discharge and solar  
 528 flux, has a opposite sign, we can expect that at 2 or 3 years after a maximum (minimum)  
 529 solar, the spring discharge to be lower (higher). In the Fig. 10c, the power spectra for the  
 530 Danube discharge during spring, indicates significant peaks at 4yr (CL close to 95%) and at  
 531 10.7yr, with a CL near 90%. These peaks might be associated with the internal atmospheric  
 532 variability and respectively with the solar variability.

533 A different possible signature of the solar activity was found in the time series of the  
 534 index that defines atmospheric circulation of blocking type over Atlantic-European region, for  
 535 the period 1948-2000, during the winter season. As can be seen in Fig. 11, a possible response  
 536 of blocking circulation to the solar activity is given by the significant correlations with a delay  
 537 of two years and three years to the solar flux. It is worth noting that in this case, the filtering  
 538 process does not lead to an improvement of the significance of the correlation, even if its  
 539 value increases. Thus it is necessary a rigorous test for correlation's significance, especially  
 540 for data smoothed.

541 Therefore, we might conclude that about 2-3 years after producing a maximum (minimum)  
 542 solar, during winter, atmospheric circulation of blocking type is enhanced (weakened) over  
 543 the Atlantic-European region.

544

545  
546  
547

### 4.3.3 QBO role in modulation of the influence of solar forcing

548       Regarding QBO influence on the relationship between solar activity and terrestrial  
549 parameters, there are several investigations (Van Loon and Labitzke, 1988; Bochníček et  
550 al.1999, Huth et al., 2009), which demonstrated that QBO phase is very important for  
551 emphasizing these links. We see in QBO mainly an important modulator of the impact of  
552 solar activity on the phenomena of the lower troposphere. To test this hypothesis, in this  
553 paper, the years with east QBO phase, during winter months have been selected, and  
554 correlations between solar flux and more terrestrial variables were achieved. The correlation  
555 coefficient between the solar flux and the unfiltered EBI during winter, for all those 53 years,  
556 is 0.15 and it is not statistically significant. By selecting only the years with QBO in the east  
557 phase in the winter months (34 cases), the correlation coefficient is 0.32 at the confidence  
558 level around 95%. It is interesting that although the power spectrum (Fig. 8a) highlights  
559 significant peaks related to the QBO (2.4 and 2.7 years), the correlation coefficient between  
560 EBI and QBO is insignificant. This suggests that the spectral representation is very useful in  
561 time series analysis and the QBO phases modulate the connection between solar activity and  
562 blocking circulation. These findings related with the QBO role are in accordance with the  
563 results obtained in Barriopedro et al. (2008), Huth et al., (2009), Sfica et al. (2015). In  
564 Cnossen and Lu (2011) are presented some of the mechanisms which explain the QBO role in  
565 the solar signature in the climate variables. These mechanisms have been supported by both  
566 observational and modeling studies, but some of them are yet unclear.

567       It is enlightening solar impact (by flux) on atmospheric circulation in the lower troposphere,  
568 during the east phase of QBO, when the solar maximum is associated with blocking event over the  
569 Northern Atlantic and north-western Europe (Fig. 12a), and a geopotential with a opposite  
570 distribution that occurs during the solar minimum. (Fig.12b).

571       The advantage of the composite maps, used to outline the response to the solar variability, is  
572 shown in Sfica et al. (2015), which specifies that through these composite maps, nonlinearities are  
573 taken into account, compared to using linear methods.

574       Our findings, presented in the Fig. 12, are in concordance with Barriopedro et al. (2008),  
575 namely, QBO is a modulator of the of the atmospheric circulation transformation from a blocking  
576 type circulation to a zonal one and vice versa, under the solar impact.

577       We mention that in the period 1948-2000 were recorded 34 months of winter (DJF) in which  
578 occurred east QBO phase and the solar flux has produced in the lower troposphere an atmospheric  
579 blocking events, or a zonal atmospheric circulation, at middle and higher latitudes, depending on the  
580 state of maximum or minimum solar activity, respectively.

581  
582

## 5 Conclusions

583

584  
585       In the present investigation, we focused on finding predictors for the discharge in the  
586 Danube lower basin, which present a high level of statistical significance.

587       In the first part of the paper we tested the predictors for the discharge, from the fields  
588 of temperature, precipitation, cloud cover in the Danube basin, and indices of atmospheric  
589 circulation over the European Atlantic region.

590       Each of the temperature, precipitation and cloud cover fields in the Danube basin was  
591 decomposed in EOFs, and as predictors were considered only the first principal component  
592 (PC1). Also a drought index (TPPI) derived from the standardized temperature and  
593 precipitation was taken as predictor for the discharge in the Danube lower basin.

594       The atmospheric circulation has been quantified by Greenland Balkan Oscillation  
595 (GBO) and North Atlantic Oscillation (NAO) indices and the blocking type indices. The

596 analysis was performed separately for each season and on the two period (1901-2000) and  
597 (1948-2000).

598 Main statistically significant results for this part of our research are the following:

- 599 1. The correlative analyses simultaneously for each season revealed that, except for  
600 the winter season, drought index (TPPI) has the highest weight to the discharge  
601 variability in the lower basin of the Danube.
- 602 2. Testing the predictors, in order to see their predictive capacity, with a lag of  
603 several months in advance of discharge, concluded that TPPI in winter and spring  
604 is a good indicator for the Danube discharge in spring and summer respectively.
- 605 3. We demonstrated that for the winter, GBOI has an influence on the climate  
606 variables in the Danube middle and lower basin more significant than NAOI.
- 607 4. Analysis for the period 1948-2000, reveals that in winter, the GBOI weight for the  
608 Danube discharge is similar to those of the blocking index over the European  
609 sector.

610 In the second part of the paper, we focused on solar/geomagnetic impact on the  
611 terrestrial variables. Because the solar and geomagnetic variables as well as the smoothing  
612 procedures through various filters, respectively low pass filter and band pass filters applied in  
613 this investigation, shows strong serial correlations, all correlative analyzes were performed  
614 through rigorous testing of statistical significance. The number of observations was reduced to  
615 the effective number of degrees of freedom, corresponding to the independent observations.

616 The filtering procedures led to improvement of the correlative analyses between solar or  
617 geomagnetic activity and terrestrial variables, under the condition of a rigorous test of the  
618 statistical significance.

619 The main findings of our research for this topic are the following:

- 620 5. The most significant signatures of solar/geomagnetic variability were obtained in the  
621 drought indicator (TPPI). Because the precipitation does not respond just as well as,  
622 temperatures to the solar variability, it is preferably analysis the TPPI variable instead  
623 of temperatures and precipitation separately.
- 624 6. From the analysis of correlations with the lags from -1 to 15 years, delay of the  
625 terrestrial variables in comparison with the solar/geomagnetic activity, we obtained  
626 very different results, depending on the season and on the considered variables, as well  
627 as on the filtering procedure. Such, we might conclude that in winter, about 2-3 years  
628 after producing a maximum (minimum) solar, winter, atmospheric circulation of  
629 blocking type is enhanced (weakened) over the Atlantic-European region. Also, it was  
630 found that the Danube discharge in the lower basin, at the 2 or 3 years during spring  
631 and summer, after a maximum (minimum) solar, will be lower (higher).
- 632 7. An atmospheric index that is associated with the solar variability, even more  
633 significant than to the geomagnetic index *aa*, is atmospheric circulation index GBO, in  
634 summer. Therefore, at the 2-3 years after a maximum (minimum) of solar activity,  
635 expects a change of atmospheric circulation in the Atlantic-European region,  
636 quantified by GBOI, by a diminution of this index, i.e. decrease (increase) of pressure  
637 in Greenland area and an increase (decrease) in atmospheric pressure in the Balkans.
- 638 8. By multitaper method (MTM) procedure, the power spectra have highlighted both  
639 quasi-periodicities related to solar activity and the other oscillations such as QBO. In  
640 the time series of AEBI (spring), and EBI (winter) the most significant periodicity is  
641 related to QBO (2.2-2.7 years) and with an approximately 90% confidence level there  
642 are peaks at 10-14 years, which may be linked to 11-year solar cycle.
- 643 9. The composite maps revealed that solar impact (by flux) on atmospheric circulation in  
644 the middle troposphere, during the east phase of QBO, is associated with blocking

645 event over the Northern Atlantic and north-western Europe, and a geopotential with a  
 646 opposite distribution that occurs during the solar minimum.  
 647 In this study, we focused only on observational data, so that in next our investigations, we will  
 648 take into account significant predictors for the Danube basin found in this investigation, like  
 649 GBOI, TPPI and atmospheric blocking indices from the outputs of the climate simulation  
 650 models.

651  
 652 *Acknowledgements.* This study has been achieved under VALUE: COST Action ES1102.  
 653

## 654 **References**

- 655  
 656 Allen, Myles R., and Leonard A. Smith : "Monte Carlo SSA: Detecting irregular oscillations  
 657 in the presence of colored noise.", *Journal of Climate* 9, no. 12 , 3373-3404, 1996.  
 658 Ault, T. R., J. E. Cole, and S. St George: The amplitude of decadal to multidecadal variability  
 659 in precipitation simulated by state-of-the-art climate models, *Geophysical Research Letters*  
 660 39, no.21, 2012.  
 661 Barriopedro, D., Garcia-Herrera, R., and Huth, R.: Solar modulation of Northern Hemisphere  
 662 winter blocking, *J. Geophys. Res.*, 113, D14118, doi:10.1029/2008JD009789, 2008.  
 663 Benestad, R.E.: Schmidt GA: Solar trends and global warming, *J. Geophys. Res.* 114:D14101,  
 664 doi:10.1029/2008JD011639, 2009.  
 665 Blöschl, G., Nester, T., Komma, J., Parajka, J., and Perdigão, R. A. P.: The June 2013 flood in  
 666 the Upper Danube Basin, and comparisons with the 2002, 1954 and 1899 floods, *Hydrol.*  
 667 *Earth Syst. Sci.*, 17, 5197–5212, doi:10.5194/hess-17-5197-2013, 2013.  
 668 Bochníček, J., Hejda, P., and Pýcha, J.: The effect of geomagnetic and solar activity on the  
 669 distribution of controlling pressure formations in the Northern Hemisphere in winter,  
 670 *Studia geophysica et geodaetica*, 43(4), 390-398,1999.  
 671 Bretherton, C.S., Widmann, M., Dymnikov, V.P., Wallace, J.M. and Bladé, I.: The effective  
 672 number of spatial degrees of freedom of a time-varying field, *Journal of climate*, 12(7),  
 673 1990-2009, 1999.  
 674 Brugnara, Y., Brönnimann, S., Luterbacher, J., and Rozanov, E.: Influence of the sunspot  
 675 cycle on the Northern Hemisphere wintertime circulation from long upper-air data sets,  
 676 *Atmos. Chem. Phys.*, 13, 6275-6288, doi:10.5194/acp-13-6275-2013, 2013.  
 677 Cnossen, I., and H. Lu: The vertical connection of the quasi-biennial oscillation-modulated 11  
 678 year solar cycle signature in geopotential height and planetary waves during Northern  
 679 Hemisphere early winter, *J. Geophys. Res.*, 116, D13101, doi:10.1029/2010JD015427,  
 680 2011.  
 681 Cubasch, U., Voss, R., Hegerl, G.C., Waszkewitz, J. and Crowley, T.J.: Simulation of the  
 682 influence of solar radiation variations on the global climate with an ocean-atmosphere  
 683 general circulation model, *Climate Dynamics*, 13(11), 757-767, 1997.  
 684 Davini, P., Cagnazzo, C. Gualdi, S. and Navarra, A.: Bidimensional Diagnostics, Variability,  
 685 and Trends of Northern Hemisphere Blocking, *J. Climate*, 25, 6496–6509, 2012.  
 686 Demetrescu, C. and Dobrica,V.: Signature of Hale and Gleissberg solar cycles in the  
 687 geomagnetic activity, *J. Geophys. Res.*, 113, A02103, doi:10.1029/2007JA012570, 2008.  
 688 Dima, M., Lohmann, G. and Dima I.: Solar-Induced And Internal Climate Variability at  
 689 decadal time scales, *Int. J. Climatol.*, 25: 713–733, 2005.  
 690 Dobrica, V., C. Demetrescu, Boroneant, C. and Maris G.: Solar and geomagnetic activity  
 691 effects on climate at regional and global scales: Case study-Romania, *J.Atmos. Sol.-Terr.*  
 692 *Phy.*, 71 (17-18), 1727-1735, doi:10.1016/j.jastp.2008.03.022, 2009.

- 693 Dobrica V, Demetrescu, C.: On the evolution of precipitation in Central and South-Eastern  
694 Europe and its relationship with Lower Danube discharge, in: AGU Fall Meeting  
695 Abstracts, 11, 1030, 2012.
- 696 Drobyshev, I., Niklasson, M., Linderholm, H.W., Seftigen, K., Hickler, T., Eggertsson, O.:  
697 Reconstruction of a regional drought index in southern Sweden since AD 1750, *The*  
698 *Holocene* 21(4) 667-679, doi: 10.1177/0959683610391312, 2011.
- 699 Ebisuzaki, W.: A Method to Estimate the Statistical Significance of a Correlation when the  
700 Data is Serially Correlated, *J. Climate*, 10:2147–2153, 1997.
- 701 Echer, M. S., Echer, E., Nordemann, D. J. R., and Rigozo, N. R.: Multi-resolution analysis of  
702 global surface air temperature and solar activity relationship, *Journal of Atmospheric and*  
703 *Solar-Terrestrial Physics*, 71(1), 41-44, 2009.
- 704 Echer, M.S., Echer, E., Rigozo, N.R., Brum, C.G.M., Nordemann, D.J.R., and Gonzalez,  
705 W.D.: On the relationship between global, hemispheric and latitudinal averaged air surface  
706 temperature (GISS time series) and solar activity, *Journal of Atmospheric and Solar-*  
707 *Terrestrial Physics*, 74, pp.87-9,2012.
- 708 El-Janyani, S., Massei, N., Dupont, J.P., Fournier, M. and Dörfliger, N.: Hydrological  
709 responses of the chalk aquifer to the regional climatic signal, *Journal of Hydrology*, 464,  
710 485-493, 2012.
- 711 Ghil, M., Allen, M.R., Dettinger, M.D., Ide, K., Kondrashov, D., Mann, M.E., Robertson,  
712 A.W., Saunders, A., Tian, Y., Varadi, F., Yiou, P.: Advanced spectral methods for  
713 climatic time series, *Reviews of Geophysics* 40 (1), doi: 10.1029/2001RG000092, 2002.
- 714 Gilman D L, Fuglister F J, Mitchell J M. : On the power spectrum of “red noise”, *J Atmos*  
715 *Sci* **20**:182–184, 1963.
- 716 Gray, L. J., A. A. Scaife, D. M. Mitchell, S. Osprey, S. Ineson, S. Hardiman, N. Butchart, J.  
717 Knight, R. Sutton, and Kodera K.: A lagged response to the 11 year solar cycle in observed  
718 winter Atlantic/Euro pean weather patterns, *J. Geophys. Res. Atmos.*, 118, 13, 405–13,  
719 420, doi:10.1002/2013JD020062, 2013.
- 720 Hertig, E., Beck, C., Wanner, H., Jacobeit, J.: A review of non-stationarities in climate  
721 variability of the last century with focus on the North Atlantic-European sector, *Earth-*  
722 *Science Reviews* 147, 1–17, doi:10.1016/j.earscirev.2015.04.009, 2015.
- 723 Hurrell, JW, Kushnir Y, Visbeck M, Ottersen G: Research Abstracts EGU2007-A-08910  
724 9:1029- 2003. An overview of the North Atlantic Oscillation. In: Hurrell, J.W., Kushnir,  
725 Y., Ottersen, G., Visbeck, M. (Eds.), *The North Atlantic Oscillation, Climatic Significance*  
726 *and Environmental Impact*, AGU Geophysical Monograph, 134, 1–35, 2003.
- 727 Huth, R., Pokorná, L., Bochníček, J., and Hejda, P.: Combined solar and QBO effects on the  
728 modes of low-frequency atmospheric variability in the Northern Hemisphere, *Journal of*  
729 *Atmospheric and Solar-Terrestrial Physics*, 71(13), 1471-1483, 2009.
- 730 Lejenas, H., and Okland, H.: Characteristics of Northern Hemisphere blocking as determined  
731 from a long time series of observational data, *Tellus*, 35A, 350-362, 1983.
- 732 Lohmann, G., Rambu, N., and Dima, M.: Climate signature of solar irradiance variations:  
733 analysis of long-term instrumental, historical, and proxy data, *International Journal of*  
734 *Climatology*, 24(8), pp.1045-1056, 2004.
- 735 Love, J. J., K. Mursula, V. C. Tsai, and Perkins, D. M.: Are secular correlations between  
736 sunspots, geomagnetic activity, and global temperature significant?, *Geophys. Res. Lett.*,  
737 38, L21703, doi: 10.1029/2011GL049380, 2011.
- 738 Mann, M. E. and Lees, J.: Robust estimation of background noise and signal detection in  
739 climatic time series, *Climatic Change*, 33, 409–445, 1996.
- 740 Mann, M. E.: On smoothing potentially non-stationary climate time series, *Geophys. Res.*  
741 *Lett.*, 31, L07214, doi: 10.1029/2004GL019569, 2004.

- 742 Mann, M. E.: Smoothing of climate time series revisited, *Geophys. Res. Lett.*, 35, L16708,  
743 doi: 10.1029/2008GL034716, 2008.
- 744 Mares, I., Mares, C., Mihailescu, M.: NAO impact on the summer moisture variability across  
745 Europe, *Physics and chemistry of the Earth*, 27, 1013-1017, 2002.
- 746 Mares C., Mares, I., and Stanciu, A: On the possible causes of the severe drought in the  
747 Danube lower basin in 2003, in: *Proceedings of the International Conference on "Water  
748 Observation and Information System for Decision Support"* Ohrid, Republic of  
749 Macedonia, 23- 26 May., 2006.  
750 [http://balwois.mpl.ird.fr/balwois/administration/full\\_paper/ffp-672.pdf](http://balwois.mpl.ird.fr/balwois/administration/full_paper/ffp-672.pdf) )
- 751 Mares, C., Mares, I. and Stanciu, A.: Extreme value analysis in the Danube lower basin  
752 discharge time series in the 20<sup>th</sup> century, *Theoretical and Applied Climatology*, 95, 223-  
753 233, 2009.
- 754 Mares, I., Mares, C., Stanciu,A., and Mihailescu, M.: On the climate models performances to  
755 simulate the main predictors that influence the discharges in the Danube middle and lower  
756 basin, *Geophysical Research Abstracts*, 13, EGU2011-2325, EGU General Assembly,  
757 2011.
- 758 Mares, C., Mares, I. Stanciu, A., and Mihailescu,M.: North Atlantic Oscillation (NAO)  
759 influence on the Danube lower basin, *Proc. Fifth Int. Scientific Conf. on Water, Climate  
760 and Environment: BALWOIS 2012*, Ohrid, Macedonia, Balwois, 2012-771, 2012.
- 761 Mares, I., Mareş, C. and Mihăilescu M.: On the statistical significance of the sea level  
762 pressure climatic signal simulated by general circulation models for the 21<sup>st</sup> century over  
763 Europe. *Rev. Roum. Géophysique*, 25–40, 2013a.
- 764 Mares, I., Mareş, C., and Mihailescu, M.: Stochastic modeling of the connection between sea  
765 level pressure and discharge in the Danube lower basin by means of Hidden Markov  
766 Model, *EGU General Assembly Conference Abstracts*, 15, 7606, 2013b.
- 767 Mares, I., Dobrica, V., Demetrescu, C. and Mares,C.: Moisture variability in the Danube  
768 lower basin: an analysis based on the Palmer drought indices and the solar/geomagnetic  
769 activity influence, *Geophysical Research Abstracts*, 16, EGU2014-6390, 2014.
- 770 Mares, C., Adler M. J., Mares I, Chelcea, S., Branescu, E.: Discharge variability in  
771 Romania using Palmer indices and a simple atmospheric index of large-scale circulation,  
772 *Hydrological Sciences Journal*, doi: 10.1080/02626667.2015.1006233), 2015a.
- 773 Mares, I., Dobrica,V., Demetrescu, C., and Mares, C.: Influence of the atmospheric blocking  
774 on the hydrometeorological variables from the Danube basin and possible response to the  
775 solar/geomagnetic activity, *Geophysical Research Abstracts*, 17, EGU2015-4154-3,2015,  
776 EGU General Assembly 2015 (PICO2.6), 2015b.
- 777 Mares, C., Mares,I., and Mihailescu, M.: Identification of extreme events using drought  
778 indices and their impact on the Danube lower basin discharge, *Hydrological Processes*,  
779 doi: 10.1002/hyp.10895), 2016a.
- 780 Mares, I., Dobrica, V. Demetrescu, C.,and Mares, C.: Hydrological response in the Danube  
781 lower basin to some internal and external forcing factors of the climate system,  
782 *Geophysical Research Abstracts*, 18, EGU2016-7474, EGU General Assembly 2016b.
- 783 Massei, N., Laignel, B., Deloffre, J., Mesquita, J., Motelay, A., Lafite, R., and Durand, A.:  
784 Long-term hydrological changes of the Seine River flow (France) and their relation to the  
785 North Atlantic Oscillation over the period 1950–2008, *International Journal of  
786 Climatology*, 30(14), pp.2146-2154, 2010.
- 787 Palamara, D.R. and Bryant, E.A.: March. Geomagnetic activity forcing of the Northern  
788 Annular Mode via the stratosphere, in: *Annales Geophysicae*, 22, No. 3, 725-731, 2004.
- 789 Papadimitriou, L. V., Koutroulis, A. G., Grillakis, M. G., and Tsanis, I. K.: High-end climate  
790 change impact on European runoff and low flows – exploring the effects of forcing biases,  
791 *Hydrol, Earth Syst. Sci.*, 20, 1785-1808, doi:10.5194/hess-20-1785-2016, 2016.



- 792 Percival, D. B. and Walden, A. T.: Spectral Analysis for Physical Applications, Cambridge  
 793 University Press, Cambridge, UK., 1986.
- 794 Press, W. H., S. A. Teukolsky, W. T. Vetterling, and Flannery, B. P.: Numerical Recipes,  
 795 Cambridge Univ. Press, Cambridge, U. K., 1992
- 796 Prestes, A., Rigozo, N. R., Nordemann, D. J. R., Wrasse, C. M., Echer, M. S., Echer, E., ...  
 797 and Rampelotto, P. H.: Sun–earth relationship inferred by tree growth rings in conifers  
 798 from Severiano De Almeida, Southern Brazil, *Journal of Atmospheric and Solar-*  
 799 *Terrestrial Physics*, 73(11), 1587-1593, 2011.
- 800 Rimbu N, Boroneanț C, Buță C, and Dima M.: Decadal variability of the Danube river flow  
 801 in the lower basin and its relation with the North Atlantic Oscillation, *International Journal*  
 802 *of Climatology*., 22(10):1169-79, 2002.
- 803 Rimbu, N., and Lohmann, G.: Winter and summer blocking variability in the North Atlantic  
 804 region–evidence from long-term observational and proxy data from southwestern  
 805 Greenland, *Climate of the Past*, 7(2), 543-555, 2011.
- 806 Rimbu, N., Dima, M., Lohmann, G. and Musat, I.: Seasonal prediction of Danube flow  
 807 variability based on stable teleconnection with sea surface temperature, *Geophysical*  
 808 *Research Letters*, 32(21), 2005.
- 809 Scaife, A. A., Ineson, S., Knight, J. R., Gray, L.J., Kodera, K., and Smith, D. M.: A  
 810 mechanism for lagged North Atlantic climate response to solar variability, *Geophys. Res.*  
 811 *Letts.*, 40, 434–439, doi:10.1002/grl.50099, 2013.
- 812 Sfică, L., Voiculescu, M., and Huth, R.: The influence of solar activity on action centres of  
 813 atmospheric circulation in North Atlantic, *Ann. Geophys.*, 33, 207-215,  
 814 doi:10.5194/angeo-33-207-2015, 2015.
- 815 Tapping, K.F. : The 10.7 cm solar radio flux (F10.7), *Space Weather*, 11(7), 394-406, 2013.
- 816 Thiebaut, H. J., and Zwiers, F. W.: The interpretation and estimation of effective sample size,  
 817 *J. Climate Appl. Meteor.*, 23, 800–811, 1984.
- 818 Thomson, D. J.: Spectrum estimation and harmonic analysis, *IEEE Proc.*,70, 1055-1096,  
 819 1982.
- 820 Torrence, C., and Compo, G. P.: A practical guide to wavelet analysis. *Bull. Amer. Meteor.*  
 821 *Soc.*, 79, 61–78, 1998.
- 822 Trenberth, K. E., and Paolino, D. A.: The Northern Hemisphere sea level pressure data set:  
 823 Trends, errors, and discontinuities, *Mon. Weather Rev.* 108: 855-872, 1980.
- 824 Turki, I., Laignel, B., Massei, N., Nouaceur, Z., Benhamiche, N., and Madani, K.:  
 825 Hydrological variability of the Soummam watershed (Northeastern Algeria) and the  
 826 possible links to climate fluctuations, *Arabian Journal of Geosciences*, 9(6), 1-12, 2016.
- 827 Valty, P., De Viron, O., Panet, I., and Collilieux, X.: Impact of the North Atlantic Oscillation  
 828 on Southern Europe Water Distribution: Insights from Geodetic Data. *Earth*  
 829 *Interactions*, 19(10), 1-16, 2015.
- 830 Van Loon H. and Labitzke, K: Association between the 11-Year Solar Cycle, the QBO, and  
 831 the Atmosphere. Part II: Surface and 700 mb in the Northern Hemisphere in Winter, *J.*  
 832 *Climate*, 1, 905–920, 1988.
- 833 Van Loon, H., and Meehl, G. A.: Interactions between externally forced climate signals from  
 834 sunspot peaks and the internally generated Pacific Decadal and North Atlantic Oscillations,  
 835 *Geophys.Res. Lett.*, 41, 161–166, doi:10.1002/ 2013GL058670, 2014.
- 836 Vlasov, A., Kauristie, K., Kamp, M., Luntama, J.P. and Pogoreltsev, A.: A study of traveling  
 837 ionospheric disturbances and atmospheric gravity waves using EISCAT Svalbard Radar  
 838 IPY-data. *Annales Geophysicae*, 29, No. 11, 2101-2116). Copernicus GmbH, 2011.
- 839 Von Storch H.V. and Zwiers F. W.: Statistical Analysis in Climate Research. Cambridge  
 840 University Press, 484, 1999.



| Correlation with Wolf number |               |               |              |               |              |           |               |
|------------------------------|---------------|---------------|--------------|---------------|--------------|-----------|---------------|
| PC1_TT(4-8)                  | Summer        | 0.288         | 2.453        | 0.157         | 0.021        | 68        | 98%           |
| PC1_TT(9-15)                 | Fall          | 0.699         | 3.770        | 0.550         | 0.000        | 17        | 99.5%         |
| <b>PC1_PP(4-8)</b>           | <b>Spring</b> | <b>-0.242</b> | <b>2.133</b> | <b>-0.190</b> | <b>0.005</b> | <b>75</b> | <b>95-98%</b> |
| <b>PC1_PP(9-15)</b>          | <b>Spring</b> | <b>-0.538</b> | <b>2.417</b> | <b>-0.363</b> | <b>0.000</b> | <b>16</b> | <b>95-98%</b> |
| PC1_PP(4-8)                  | Winter        | -0.370        | 3.298        | -0.265        | 0.000        | 70        | >99%          |
| TPPI(UF)                     | Spring        | 0.211         | 1.973        | 0.148         | 0.029        | 85        | 95%           |
| TPPI(LPF)                    | Spring        | 0.299         | 1.736        | 0.261         | 0.000        | 33        | 90%           |
| TPPI(4-8)                    | Spring        | 0.245         | 2.154        | 0.159         | 0.019        | 74        | 95-98%        |
| TPPI(9-15)                   | Spring        | 0.585         | 2.708        | 0.395         | 0.000        | 16        | 98%           |
| TPPI(9-15)                   | Fall          | 0.673         | 3.796        | 0.553         | 0.000        | 19        | 99%           |
| GBOI (4-8)                   | Summer        | -0.346        | 2.982        | -0.230        | 0.001        | 67        | 99.5%         |
| GBOI (4-8)                   | Winter        | -0.343        | 3.169        | -0.218        | 0.001        | 77        | >99%          |
| GBOI (17-28)                 | Fall          | -0.899        | 3.485        | -0.707        | 0.000        | 5         | 95-98%        |
| Q_ORIS (4-8)                 | Winter        | -0.263        | 2.329        | -0.163        | 0.016        | 75        | 98%           |

863  
864  
865  
866

Table 3. Same as Table 2 but for 53 years (1948-2000).

| Variable                      | Season | $r$    | $t$   | $\tau$ | $p$   | $N_{eff}$ | CL     |
|-------------------------------|--------|--------|-------|--------|-------|-----------|--------|
| Correlation with aa           |        |        |       |        |       |           |        |
| EBI (UF)                      | Spring | 0.259  | 1.836 | 0.151  | 0.110 | 49        | ~95%   |
| EBI (4-8)                     | Spring | 0.528  | 3.864 | 0.382  | 0.000 | 41        | >99%   |
| ABI (UF)                      | Fall   | -0.257 | 1.848 | -0.118 | 0.210 | 51        | ~95%   |
| ABI (9-15)                    | Spring | 0.605  | 2.157 | 0.426  | 0.000 | 10        | >95%   |
| AEBI (9-15)                   | Winter | 0.749  | 3.134 | 0.589  | 0.000 | 10        | 98.5%  |
| Correlation with flux 10.7 cm |        |        |       |        |       |           |        |
| TPPI(LPF)                     | Spring | 0.444  | 1.502 | 0.322  | 0.001 | 11        | 85-90% |
| ABI(4-8)                      | Fall   | 0.578  | 4.124 | 0.312  | 0.001 | 36        | 99.9%  |
| AEBI(4-8)                     | Fall   | 0.530  | 3.697 | 0.360  | 0.000 | 37        | 99.9%  |
| EBI (4-8)                     | Winter | 0.419  | 2.678 | 0.272  | 0.004 | 37        | 98.5%  |
| Q_ORIS(4-8)                   | Winter | -0.603 | 4.390 | -0.351 | 0.000 | 36        | 99.9%  |
| GBOI (4-8)                    | Winter | -0.695 | 6.034 | -0.428 | 0.000 | 41        | 99.9%  |

867  
868

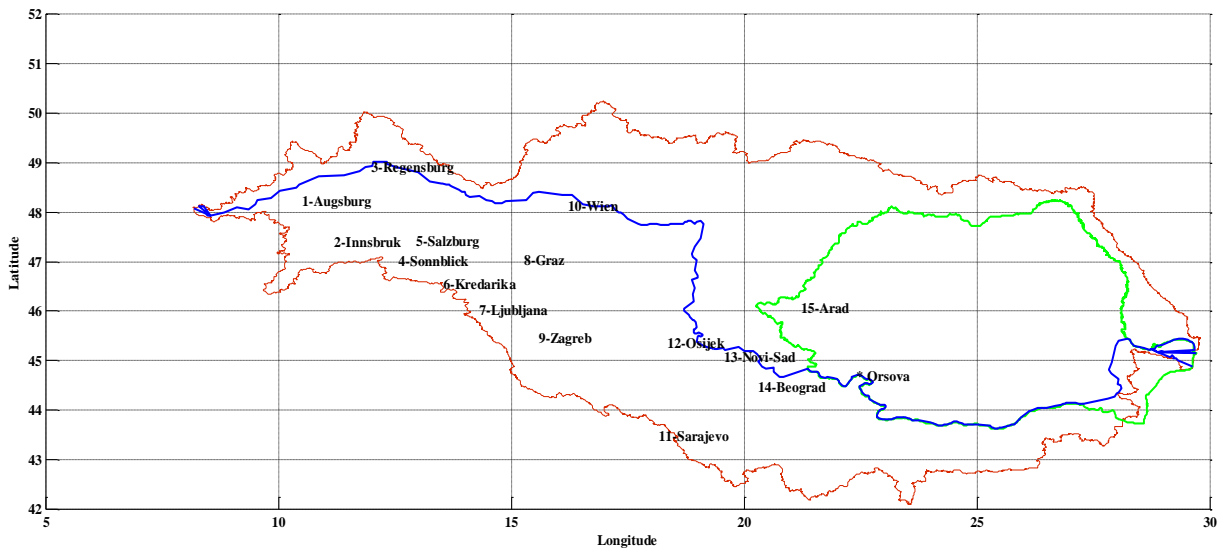

869  
870

Figure 1. Localization of 15 precipitation stations situated upstream of Orsova station.

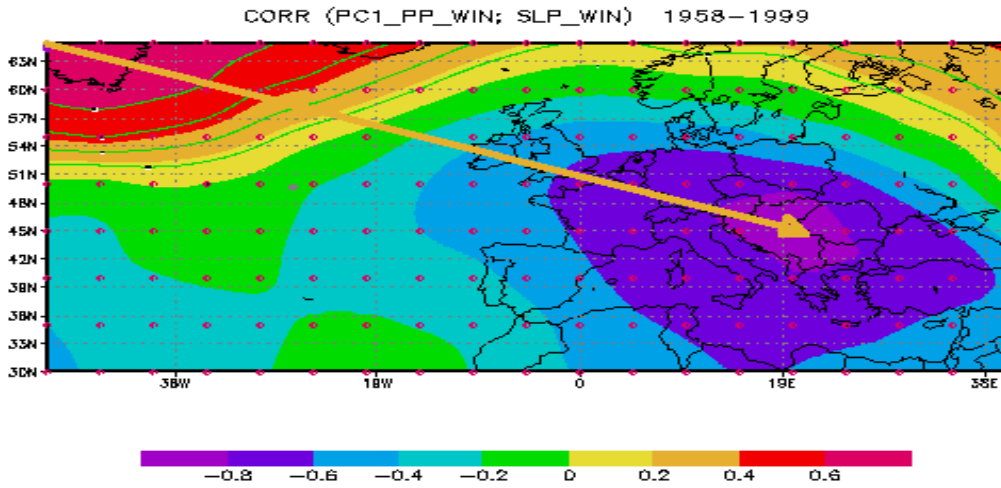

871  
872 **Figure 2.** Spatial distribution of correlation coefficients between SLP NCAR  
873 and observed PC1- PP during winter for 1958-1999.  
874  
875  
876

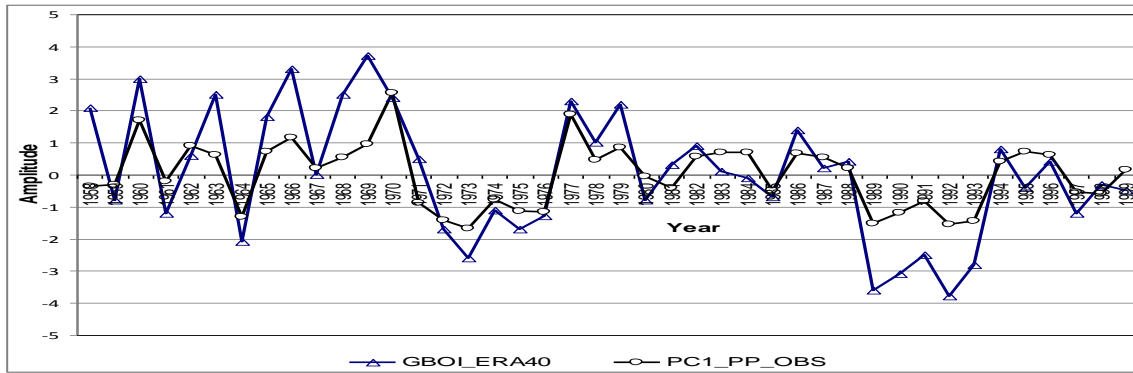

877  
878 **Figure 3.** Winter precipitation PC1 versus winter GBOI for 1958-1999 ( $R=0.84$ ).  
879  
880

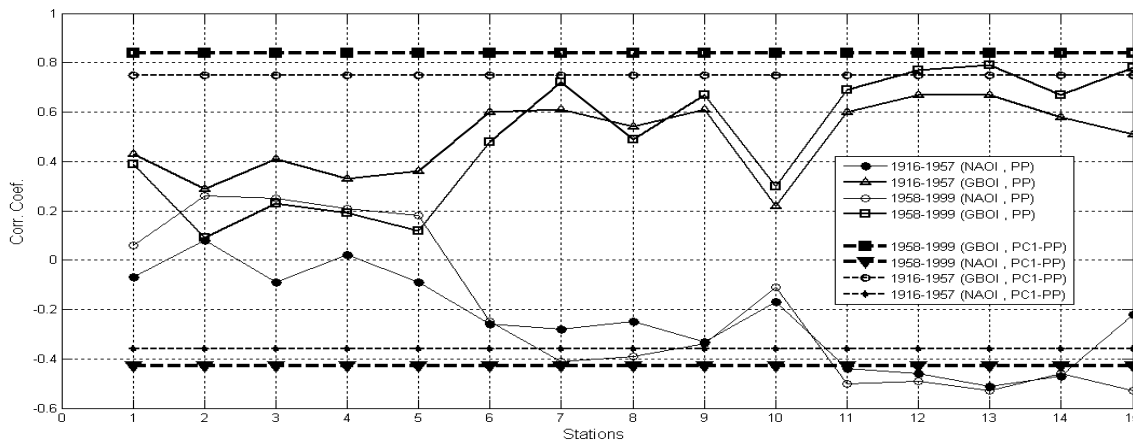

881  
882 **Figure 4.** Correlation coefficients between winter precipitation at 15 stations and NAOI and GBOI for  
883 two periods: a) 1916-1957; b) 1958-1999. The correlations between PC1-PP and two indices are  
884 marked by horizontal lines.  
885

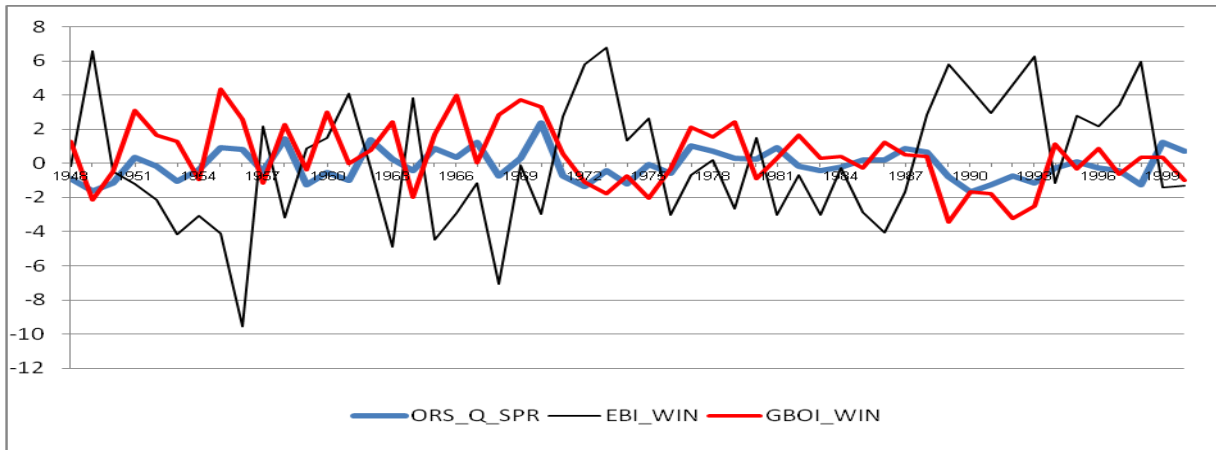

886  
887  
888  
889  
890  
891  
892  
893

**Figure 5.** Spring Orsova discharge versus winter European blocking index ( $R = -0.54$ ) and winter GBOI ( $R = 0.53$ ) for the period 1948-2000.

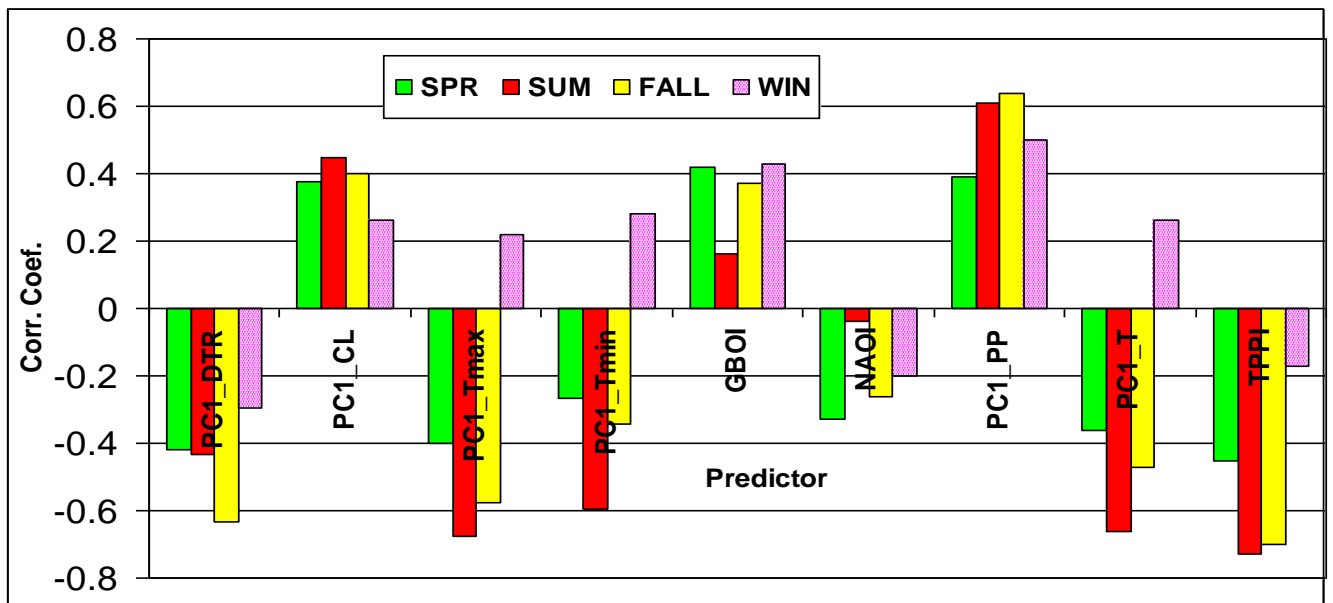

894  
895  
896  
897  
898

**Figure 6.** Simultaneous correlations between Danube discharge at Orsova and nine predictors (1901-2000)

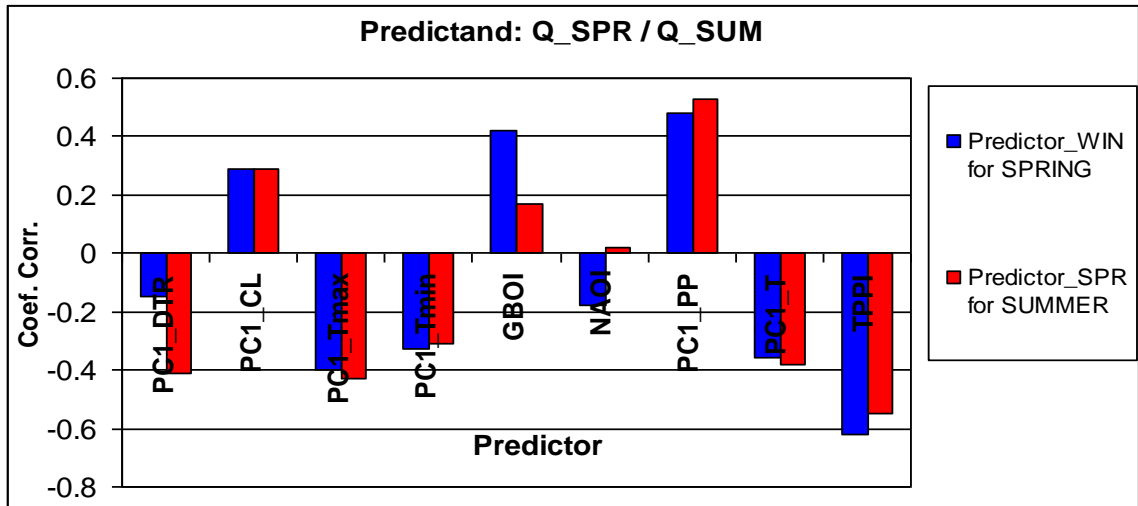

899  
900  
901  
902  
903  
904

**Figure 7.** The correlation between Orsova discharge (Q) in the spring / summer and the nine predictors in the winter/spring.

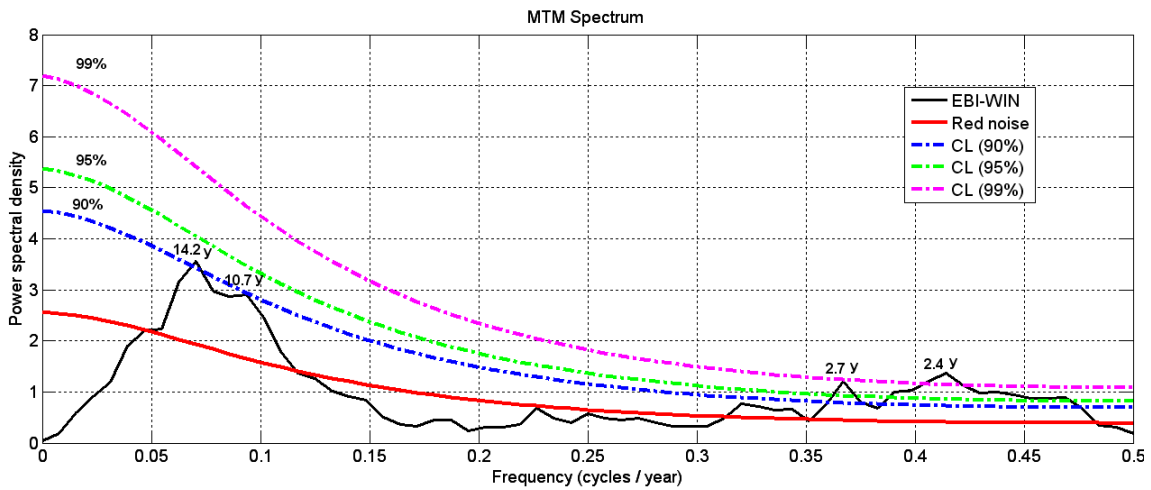

a)

905  
906  
907

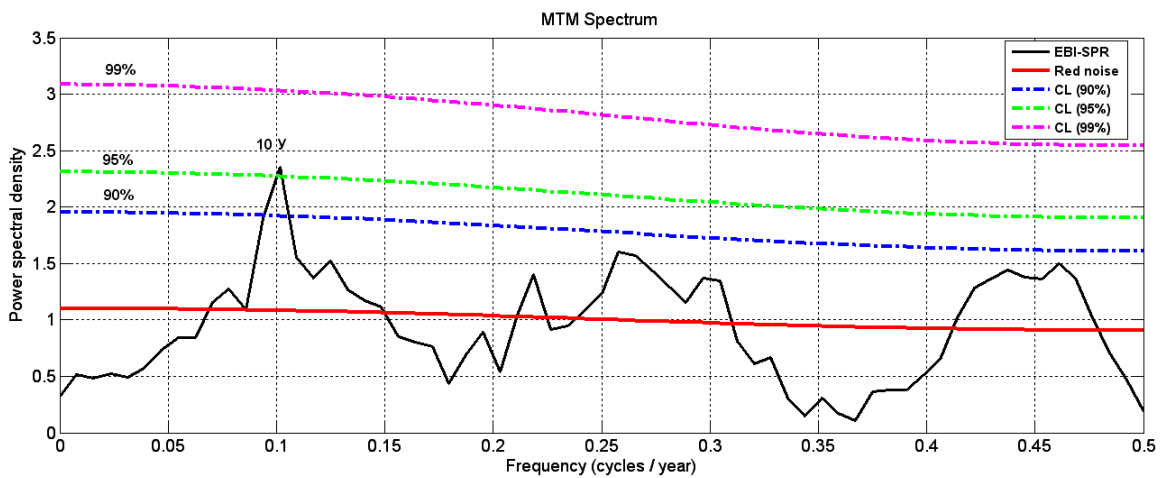

b)

908  
909  
910

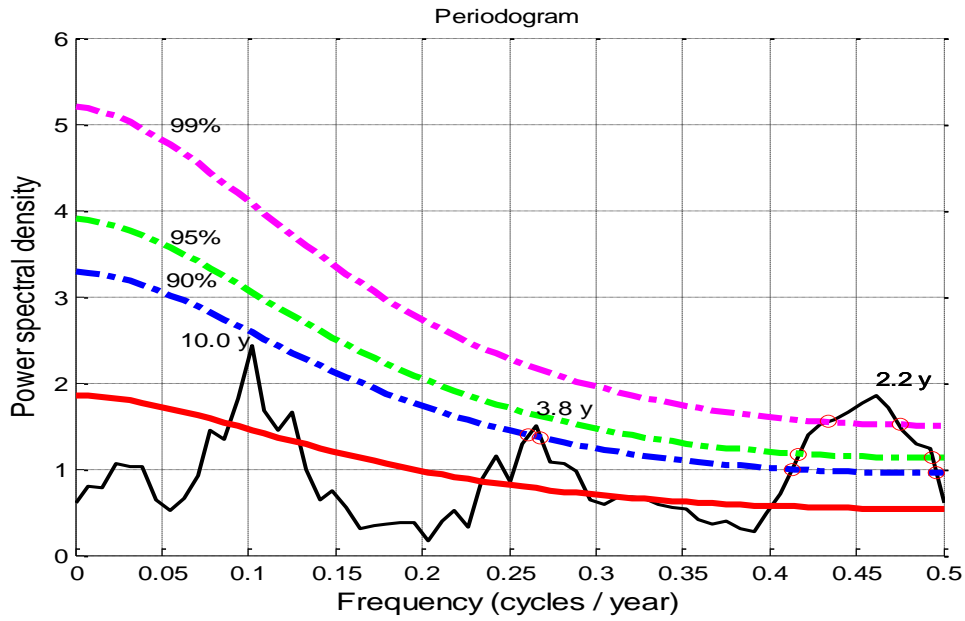

911  
912  
913  
914  
915

c)

**Figure 8.** Power spectra for the blocking indices: winter EBI (a), spring EBI (b) and spring AEBI (c).

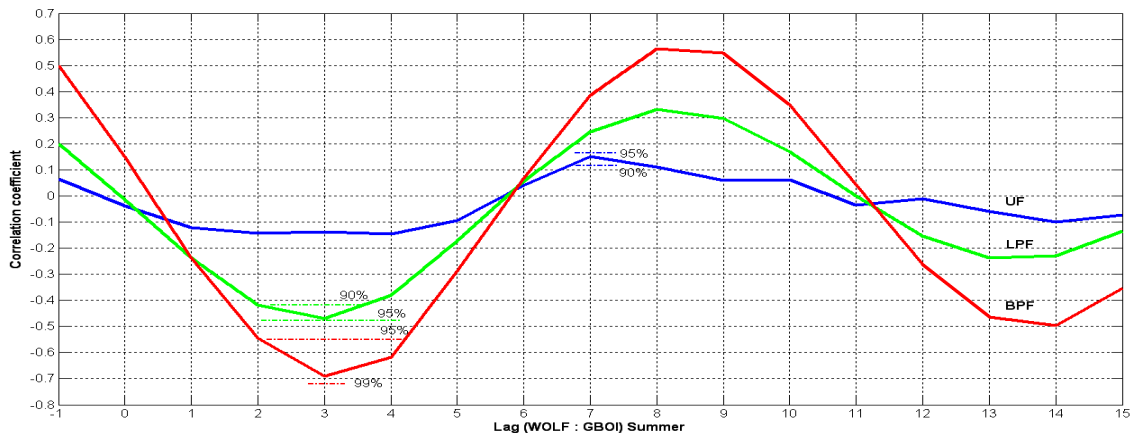

916  
917  
918  
919  
920  
921  
922

**Figure 9.** Correlation coefficients, between Wolf number and GBOI in summer with the lags between -1 and 15 yr, for three time series: unfiltered (UF), smoothing by low pass filter (LPF) and by band pass filter (9-15). The Wolf number is considered before GBOI, from 1 to 15yr.

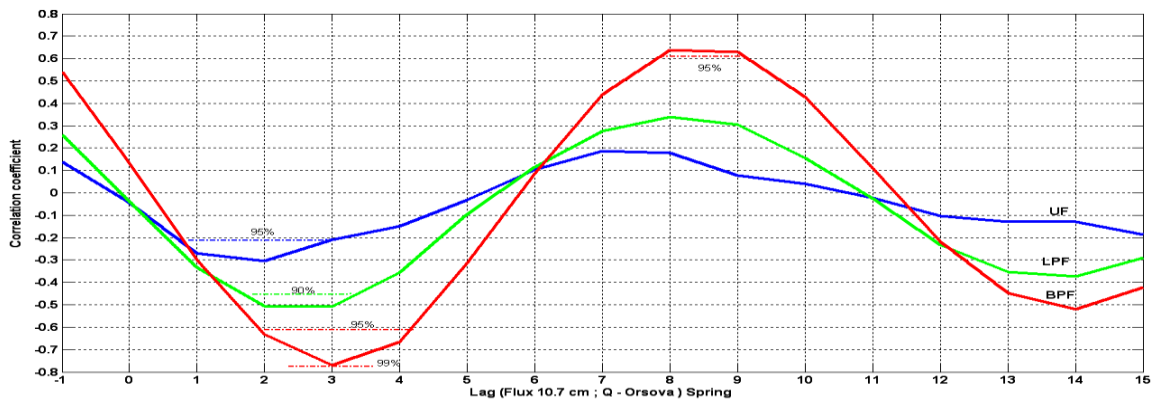

923

924

a)

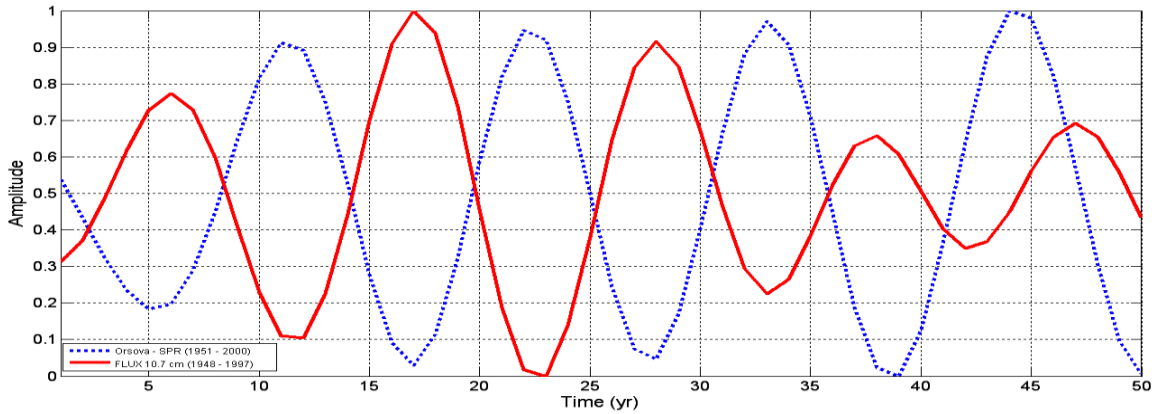

925

926

b)

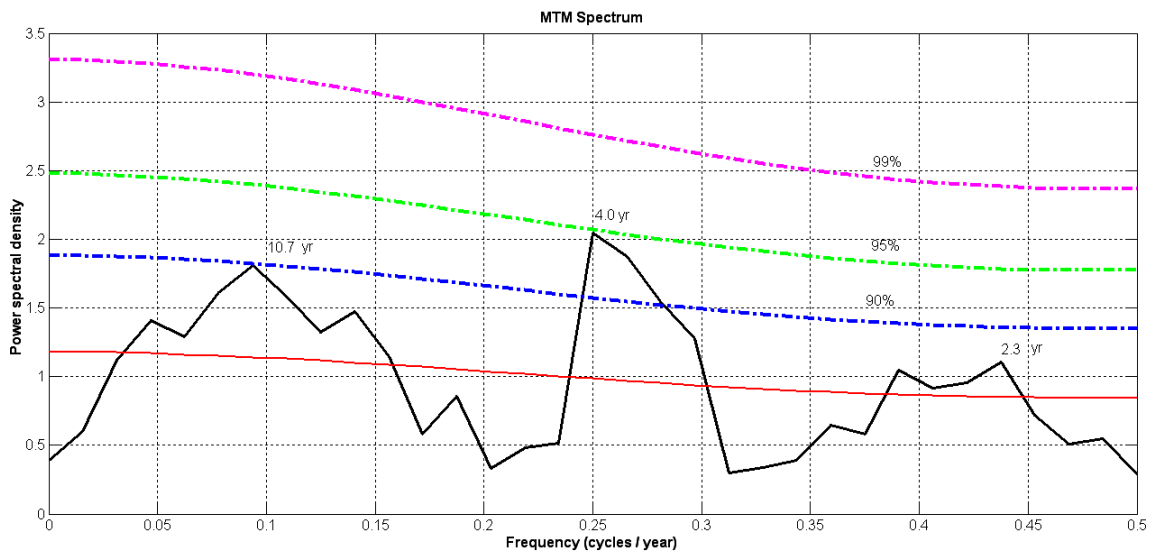

927

928

929

930

**Figure 10.** The test of a possible association between solar (Flux 10.7cm) and the Orsova discharge (Q\_ORS), during spring (1948-2000).

932

a) Correlation coefficients, between solar flux and Orsova discharge with the lags from -1 to 15 yr, for three time series: unfiltered (UF), smoothing by low pass filter (LPF) and by band pass filter (9-15);

933

b) Temporal behavior of the solar flux and Q\_ORS, filtered (9-15) with a delay of 3 years to flux. The time series are normalized.

936

c) Power spectra for spring discharge at Orsova. The time series is unfiltered.

937

938

939

940



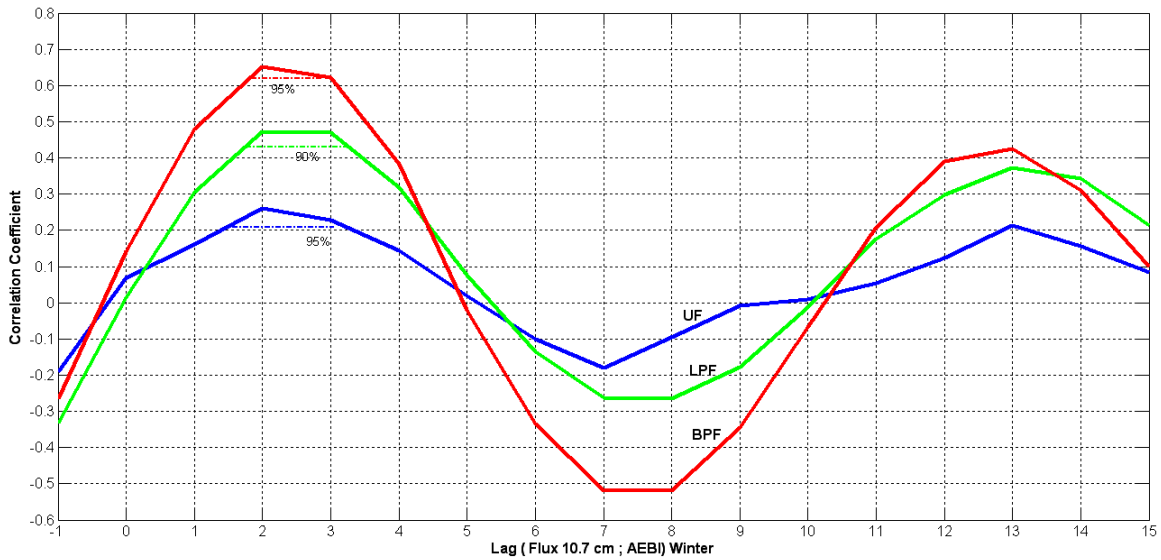

941  
942  
943  
944  
945  
946  
947

**Figure 11.** Correlation coefficients, between solar flux and AEBI with the lags between -1 and to 15yr, during winter (1948-2000), for three time series: unfiltered (UF), smoothing by low pass filter (LPF) and by band pass filter (9-15).

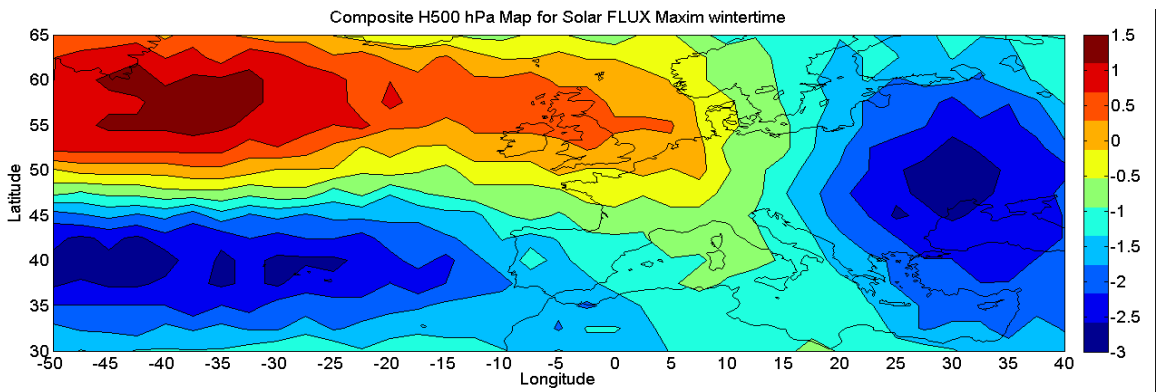

948  
949  
950

a)

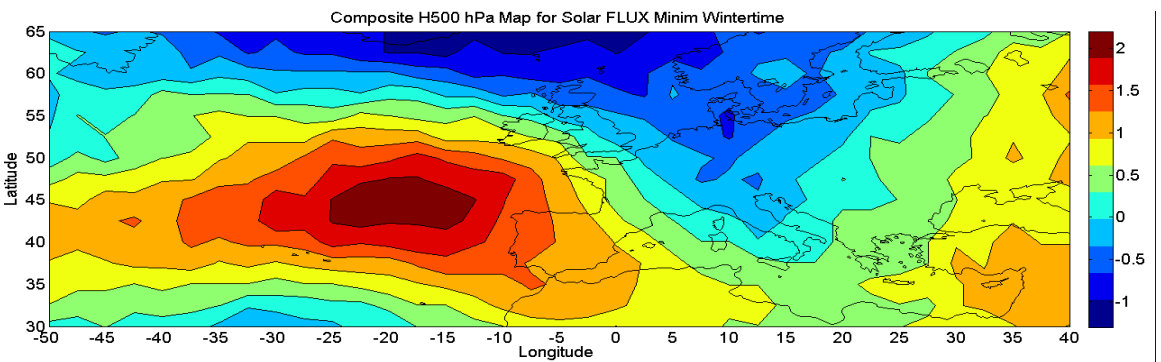

951  
952  
953  
954  
955  
956

b)

**Figure 12.** Composite maps for the winter H500 hPa anomalies, corresponding to solar flux associated with the east phase of QBO (1948-2000) and: a) maximum flux b) minimum flux

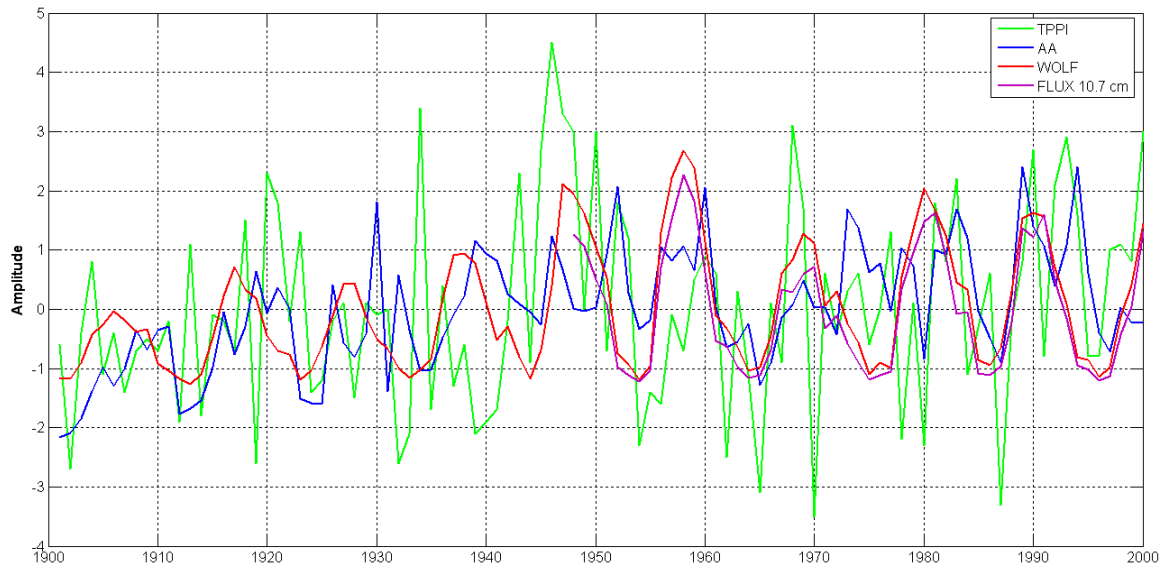

957  
958  
959  
960

**Figure 13.** Time series of Wolf number, aa, and TPPI for the period 1901-2000 and solar flux since 1948. All time series are standardized.
