# Supplementary material for: Hydrological response in the Danube lower basin to some internal and external climate forcing factors
Source: Copernicus journal article supplement (doi:10.5194/hess-2016-304), 2016-06-28
Supplement: Supplementary file [file hess-2016-304-AC3-supplement.pdf]

# Hydrological response in the Lower Danube basin to some internal and external climate forcing factors

Ileana Mares<sup>1</sup>, Venera Dobrica<sup>1</sup>, Crisan Demetrescu<sup>1</sup>, Constantin Mares<sup>2</sup>

<sup>1</sup> Institute of Geodynamics, Romanian Academy, Bucharest, Romania

<sup>2</sup> National Institute of Hydrology and Water Management, Bucharest, Romania

**Abstract.** The present study aims at investigating the influence on the Danube river discharge of natural forcing factors, such as climate parameters, that characterize internal climate variability (temperature, precipitation, atmospheric circulation indices), and external factors, such as the Earth's magnetic field and the solar forcing. We test the validity of the hypothesis that discharge variability is influenced both by internal and external forcing factors. Our analysis was performed separately for each season, for two time periods, 1901-2000 and 1948-2000. We applied developments in empirical orthogonal functions (EOFs), cross correlations with lags between -1 and 15 years, spectral analysis, filters, composite maps. In the analysis of the correlative results, the serial correlation of time series was taken into account.

In case of zero-lag correlations, the most significant results (confidence levels of 95%) for atmospheric variables are related to the predictor that considers the difference between the first principal component (PC1) of temperatures and precipitation (TPP), except for winter season, when the best predictors are the first principal component of the precipitation field (PC1\_PP) and the Greenland-Balkan Oscillation index (GBOI). GBOI is a better predictor for precipitation in the Middle and Lower Danube basins, in comparison with the North Atlantic Oscillation index (NAOI).

Significant results, with a confidence level of more than 95%, were obtained for the PC1\_PP and TPP during winter/spring, which can be considered good predictors for the spring/summer discharge in the Lower Danube basin.

A significant signature of the geomagnetic index *aa* was obtained for the band-pass filter smoothed data. According to our results, the atmospheric variables are associated with the solar/geomagnetic variability after about 2-3 years from solar maxima and minima. Possible external signals in the terrestrial variables are also revealed by power spectra and composite maps. The former show statistical significant peaks that can be associated with the Quasi-Biennial Oscillation (QBO) influence and with the solar/geomagnetic variability at the 11-year time scale. The composite maps revealed that the solar impact on atmospheric circulation in the middle troposphere during the East phase of QBO is associated with a blocking event over the northern Atlantic and north-western Europe. A geopotential with an opposite distribution occurs during the solar minimum.

Keywords: NAO, GBOI, serial correlation, low and band-pass filter, atmospheric blocking, climate changes, solar/geomagnetic activity, Danube basin

## 1 Introduction

The climatic system is a closed one, being influenced mainly by external factors, whose action is modulated by internal mechanisms. The main external factors that contribute to the climate variability are the solar activity in its various forms and the greenhouse gases. As shown for instance by Cubasch et al. (1997) and by Benestad and Schmidt (2009), it is difficult to distinguish between the anthropogenic and the solar signals and to assess

52 separately the climatic system response to their variations, especially when the recent  
53 warming comes into discussion, mainly due to limitations of simulation climate models and  
54 lack of long time-span data in many parts of the world.

55 Lohmann et al. (2004) detected solar variations associated with the Schwabe, Hale,  
56 and Gleissberg cycles of solar activity in the spatial patterns of sea-surface temperature and  
57 sea-level pressure, using band pass filters with frequencies appropriate to each of the solar  
58 cycles. Significant correlations between global surface air temperature and solar activity were  
59 obtained by Echer et al. (2009), applying wavelet decomposition. Explanation of the physical  
60 mechanism of correlations with certain lags between solar activity and climate variables can  
61 be found in Gray et al. (2013), Scaife et al. (2013), Thiéblemont et al. (2015).

62 Recent studies on the impact of solar/geomagnetic activity on the climate are reviewed  
63 by Brugnara et al. (2013). After a statistical reconstruction of the main atmospheric fields for  
64 more than 250 years, the authors perform an analysis of the 11-year solar signal in different  
65 reconstructed terrestrial datasets. They find that there is a robust response of the late-  
66 wintertime tropospheric circulation to the sunspot cycle, independently of the data set. This  
67 response is particularly significant over Europe. Although many publications reveal solar  
68 signal in Earth's climate, by various more or less robust methods, using reconstructed long  
69 time series, the scientific community has not reached a consensus on this matter. Among  
70 publications criticizing such results and showing the difficulties in highlighting this link and  
71 pointing to some errors in these investigations we mention those by Versteegh (2005) and  
72 Benestad and Schmidt (2009). The authors of these works describe also the physical  
73 mechanisms that should be considered in such investigations. Perry (2007) and Gray et al.  
74 (2010) also discussed the possible mechanisms determining the response of the Earth's  
75 climate system to solar variability. Velasco and Mendoza (2008) found that the main indices of  
76 atmospheric large-scale circulation show power spectra peaks that can be associated with  
77 Schwabe (11-15 years) and Hale (22- 24) solar cycles.

78 Regarding internal factors that influence climate at regional or local scale, a best  
79 known one, which influences climate variability in the Atlantic sector and in Europe, is the  
80 North Atlantic Oscillation (NAO) (Hurrell et al., 2003). NAO corresponds to a North-South  
81 dipole of the pressure, characterized by opposite sign simultaneous anomalies between  
82 temperate and high latitudes over the Atlantic sector. Rimbu et al. (2002) showed that there is  
83 an out-of-phase relationship between the time series of the Danube river discharge anomalies  
84 and the NAO index (NAOI). Also, Rimbu et al. (2005) found that spring Danube discharge  
85 anomalies are significantly related to winter Sea Surface Temperature (SST) anomalies.  
86 Mares et al. (2002) found, however, that the NAO signal in climate events in the Danube  
87 lower basin is relatively weak in comparison with other regions. On the other hand, NAOI is a  
88 significant predictor for Seine river (Massey et al., 2010; El - Janyani et al., 2012), north-  
89 eastern Algeria (Turki, et al., 2016), southern Sweden (Drobyshev et al., 2011), northern Italy  
90 (Zanchettin et al., 2008). Barriopedro et al. (2008) and Rimbu and Lohmann (2011) found that  
91 solar activity plays an essential role in modulating the blocking features with the strongest  
92 signal in the Atlantic sector.

93 The interaction between internal and external factors is extensively studied by Van  
94 Loon and Meehl (2014). Recent research (Valty et al., 2015) warns that for the selection of  
95 predictors such as NAO, there is a need to consider the dynamics of the total oceanic and  
96 hydrological system over wider areas. In fact, the entire climate system needs to be  
97 considered. Hertig et al. (2015) discuss the consequences of climate non-stationarities and  
98 describe the mechanisms underlying the non-linearity and non-stationarity of the climate  
99 system components, with a focus on NAO.

100 Since the Danube discharge estimation has a great importance for Romania's  
101 economy, in the present investigation we focus on predictors for the Lower Danube basin

102 discharge. The main aim of our work is to select, from various terrestrial and  
 103 solar/geomagnetic variables, predictors with significant information for that discharge,  
 104 applying robust tests for the statistical significance. Besides the NAO influence on climate  
 105 variables in the Danube basin, we analyze the atmospheric index Greenland-Balkan  
 106 Oscillation (GBOI), introduced by Mares et al. (2013b), which reflects the baric contrast  
 107 between the Balkan and the Greenland zones. We also consider in this paper the indices of  
 108 blocking type circulation, both on the Atlantic and European sector, and take into account the  
 109 effect of the phases of Quasi-Biennial Oscillation (QBO) in the region. The strong serial  
 110 correlations shown by the solar and geomagnetic variables have been properly taken into  
 111 account.

112 This paper is organized as follows: Section 2 presents data processed at regional (2.1)  
 113 and large (2.2) scale, as well as the indices that define solar and geomagnetic activity (2.3). In  
 114 Section 3, we describe the methodology. Section 4 discusses the results. Concerning the link  
 115 between atmospheric circulation at large scale and the climate variables at local or regional  
 116 scales we demonstrate that GBOI is a more significant predictor than NAOI for the climate  
 117 variables in the Danube middle and lower basin (4.1). In subsection 4.2, we consider several  
 118 predictors for climatic variables in the Danube basin, including indices of large-scale  
 119 atmospheric circulation, for the period 1901-2000, and we test predictor's weight for the  
 120 discharge in the lower basin. In subsection 4.3, the results obtained from the correlation  
 121 analysis of solar/geomagnetic signal with terrestrial variables (4.3.1), the lags involved  
 122 (4.3.2), and the QBO role in modulating these influences (4.3.3), are presented. The  
 123 conclusions are summarized in Section 5.

124

## 125 **2 Data**

126

### 127 **2.1 Regional scale**

128

129 The Lower Danube Basin discharge was recorded by Orsova station (ORS\_Q), located  
 130 at the entrance of the Danube in Romania. It represents an integrator of the upper and middle  
 131 basin. Data were provided by the National Institute of Hydrology and Water Management,  
 132 Bucharest, Romania.

133 We performed our analysis separately for each season, for two time series, one of 100  
 134 values in the time interval 1901-2000 and the other of 53 values, between 1948 and 2000. For  
 135 the period 1901-2000, in the Danube upper and middle basin (DUMB), precipitation (PP),  
 136 mean temperature (T), diurnal temperature range (DTR), maximum and minimum  
 137 temperatures (Tmx, Tmn), cloud cover (CLD) were considered at 15 meteorological stations  
 138 upstream of Orsova. The selection of stations was done according to their position on the  
 139 Danube or on its tributaries (Fig.1).

140 The monthly values of the above variables were obtained from <http://climexp.knmi.nl>.

141 Data-sets are calculated on high-resolution grids (0.5 x 0.5 degree) by the Climatic  
 142 Research Unit (CRU). In order to obtain the grid point nearest to station, we selected "half  
 143 grid points".

144 The seasonal averages for all variables considered in this study have been used.

145

### 146 **2.2 Large scale**

147

148 In order to see the influence of large-scale atmospheric circulation on the variables at  
 149 the regional scale, we considered the seasonal mean values of the sea level pressure field  
 150 (SLP) in the sector  $50^{\circ}\text{W}-40^{\circ}\text{E}$ ,  $30^{\circ}-65^{\circ}\text{N}$ . SLP data were available at  
 151 <http://rda.ucar.edu/datasets/ds010.1> of the National Center for Atmospheric Research

152 (NCAR). The 5-degree latitude/longitude grids, computed from the daily grids, begin in 1899  
 153 and cover the Northern Hemisphere from 15<sup>0</sup>N to the North Pole. The accuracy and quality  
 154 of this data is discussed by Trenberth and Paolino (1980).

155 The NAO index was downloaded from <http://www.ldeo.columbia.edu/res/pi/NAO/>.

156 The GBO index, introduced by Mares et al. (2013b), was calculated using the  
 157 correlative analysis of the first principal component (PC1) of the Empirical Orthogonal  
 158 Functions (EOFs) for the precipitation field at the 15 stations of this study with sea level  
 159 pressure (SLP) at each grid point where it was defined (Fig. 2). Then GBOI is calculated as  
 160 differences of normalized SLP at Nuuk and Novi Sad, located in opposite sign correlation  
 161 nuclei of Fig. 2.

162 For the 1948-2000 time-span we considered blocking type indices, besides the  
 163 atmospheric variables taken over 1901-2000. The calculation of these indices involves  
 164 pressure differences between mid-and northern latitudes, as shown below, in the Methods  
 165 section. For the geopotential at 500 hPa (1948-2000) provided by *British Atmospheric Data*  
 166 *Centre (BADC)* (<https://badc.nerc.ac.uk/home/index.html>). Three sectors were taken into  
 167 account: Atlantic-European (AE) on the domain (50°W- 40°E; 35°N - 65°N), Atlantic (A)  
 168 defined in (50°W - 0°, 35°N - 65°N) and European (E) in the region (0° - 40°E; 35°N - 65°N).  
 169 The corresponding blocking indices are AEBI, AI, EBI, respectively.

170

### 171 2.3 Solar/geomagnetic data

172

173 For the 100 years interval 1901-2000, the solar/geomagnetic activities are quantified  
 174 by the sunspot number, retrieved from [ftp://ftp.ngdc.noaa.gov/STP/space-weather/solar-](ftp://ftp.ngdc.noaa.gov/STP/space-weather/solar-data/solar-indices/sunspot-numbers/)  
 175 [data/solar-indices/sunspot-numbers/](ftp://ftp.ngdc.noaa.gov/STP/space-weather/solar-data/solar-indices/sunspot-numbers/) /international and, respectively, by the *aa* index. The  
 176 latter describes the geomagnetic activity at mid-latitudes; it is available at  
 177 <http://isgi.cetp.ipsl.fr/lesdonne.htm>. For the shorter time interval 1948-2000, the solar forcing  
 178 is quantified by the solar radio flux at 10.7 cm (usually called F10.7 index). Details on the  
 179 10.7 cm solar radio flux and its applications are given by Tapping (2013). Since the 10.7 cm  
 180 solar radio flux is a more objective measurement, and always measured on the same  
 181 instruments, this proxy for "solar activity" should have a similar behavior but smaller intrinsic  
 182 scatter than the sunspot number.

183 The Quasi-Biennial Oscillation (QBO) is also used in this study in order to make the link  
 184 between solar forcing, internal climate variability and discharge variability.

185 The QBO values were downloaded from [http://www.geo.fu-](http://www.geo.fu-berlin.de/met/ag/strat/produkte/qbo/qbo.dat)  
 186 [berlin.de/met/ag/strat/produkte/qbo/qbo.dat](http://www.geo.fu-berlin.de/met/ag/strat/produkte/qbo/qbo.dat), Free University of Berlin.

187

188

## 189 3 Methodology

190

191 The time series of the variables considered for the 15 stations of the study were  
 192 developed in empirical orthogonal functions (EOFs) and only the first principal component  
 193 (PC1) was kept (Mares et al., 2009, 2015a, 2016a). By means of the difference between PC1  
 194 of the temperatures (PC1\_T) and of precipitation (PC1\_PP), both standardized, we get a  
 195 drought index (TPPI). This is a slightly modified procedure (Mares et al., 1996), based on the  
 196 Ped's (1975) methodology.

197 The blocking index (*BI*) at the 500 hPa geopotential field was estimated according to  
 198 Lejenas and Okland (1983). A blocking event can be identified when the averaged zonal  
 199 index, computed as the 500 hPa height difference between 40° and 60°N, is negative over 30°  
 200 in longitude.

We calculated for each longitude  $\lambda$  three indices, for the regions: Atlantic-European (AEBI), Atlantic (ABI) and Europe (EBI) according to:

$$I_B(\lambda) = \Phi(\lambda, 57.50 N) - \Phi(\lambda, 37.50 N), \quad (1)$$

where  $\Phi$  is the 500 hPa geopotential field. The blocking index  $BI$  is a mean for  $\lambda$  longitudes of  $I_B(\lambda)$ . Positive  $BI$  reflects a blocking type circulation.

### ***Data filtering***

*Low-pass filters* were applied to the terrestrial fields to eliminate oscillations due to factors such as El Niño–Southern Oscillation (ENSO). The Mann filter (Mann, 2004, 2008) was applied with three variants that eliminate frequencies corresponding to periods lower than 8, 10 and 20 years.

*Band pass filters* were applied both to the terrestrial and to solar/geomagnetic variables. The band pass filters were of the Butterworth type (Butterworth, 1930), and the variables have been filtered in the 4-8, 9–15 and 17-28 years bands. According to Vlasov et al. (2011) and Ault et al. (2012), the frequency response for these filters is nearly flat within the passband, and they are computationally efficient, being recursive filters.

### ***Correlation analysis***

The correlation analysis in case of solar/geomagnetic activity is conducted in this paper for lags between -1 to 15 years. In many investigations, significant solar signal in the terrestrial variables has been obtained applying band-pass filters to isolate the frequency bands of interest (Lohmann et al., 2004; Dima et al., 2005; Prestes et al., 2011; Echer et al., 2012; Wang and Zhao, 2012).

In the present study we apply band pass filters for three frequency bands: (4-8yr), (9-15yr) and (17-28 yr). Because the filtered time series show a strong autocorrelation, to test the statistical significance of the link between the terrestrial and solar variables we use the *t-test*, which takes into account the effective number of independent variables and the correlation coefficient between two series. The effective number is a function of the serial correlations of the two series analyzed. Details about the statistical analysis of hydro-climatic variables can be found in Rai et al. (2013).

### ***Serial correlation***

In order to find the significance level of the correlation coefficient, we have to take into account the fact that by smoothing both terrestrial and solar/geomagnetic variables present a serial correlation. Serial correlation (also called autocorrelation) means that there is a correlation between one time series ( $x_t$ ) and the same series lagged by one or more time units ( $x_{t+k}$ ). The serial correlation coefficient for  $k$  lags ( $sr_k$ ) is given by:

$$sr_k = \frac{\sum_{t=1}^{N-k} (x_t - \bar{x}_t) \cdot (x_{t+k} - \bar{x}_{t+k})}{\left[ \sum_{t=1}^{N-k} (x_t - \bar{x}_t)^2 \cdot \sum_{t=1}^{N-k} (x_{t+k} - \bar{x}_{t+k})^2 \right]^{1/2}}, \quad (2)$$

where  $N$  is the sample size.

In the case when the analyzed time series present serial correlation, we have to estimate first the equivalent sample size (ESS). There are several methods to find the statistical significance of correlation among pairs of series presenting serial correlations (e. g., Thiébaux and Zwiers, 1984; Zwiers and von Storch, 1995; Ebisuzaki, 1997). Mares et al.

248 (2013a) applied the procedure described by Zwiers and von Storch (1995) to find ESS in  
 249 order to estimate the statistical significance of climatic change signal in the sea level pressure  
 250 field (SLP) in 21<sup>st</sup> century in comparison with the 20<sup>th</sup> century.

251 In the present analysis, in order to find the ESS, namely the number of effectively  
 252 independent observations ( $N_{eff}$ ), a simple formula is applied, which is appropriate for the  
 253 correlations involving smoothed data (Bretherton et al., 1999):  
 254

$$255 \quad N_{eff} = N \frac{(1 - r_1 r_2)}{(1 + r_1 r_2)} \quad , \quad (3)$$

256 where  $r_1$  and  $r_2$  are the lag-1 autocorrelation coefficients corresponding to the two correlated  
 257 time series, and N the number of the observations.

259 In the next step, the t-statistics (von Storch and Zwiers, 1999), is used to test the  
 260 statistical significance of the correlation coefficient.  
 261

$$262 \quad t = |r| [(N_{eff} - 2)/(1 - r^2)]^{1/2} \quad , \quad (4)$$

263 where  $r$  is the correlation coefficient between the two variables and  $N_{eff}$  is the effective  
 264 number used in the testing procedure.

266 Following von Storch and Zwiers (1999), the null hypothesis  $r = 0$  is tested by  
 267 comparing the  $t$  value in equation (4) with the critical values of t distribution with  $N_{eff} - 2$   
 268 degrees of freedom.

269 The correlated time series must have a Gaussian distribution. For this reason in the  
 270 present study we have also computed the nonparametric Kendall correlation coefficient,  
 271 which measures correlation of ranked data. Applying the algorithm described by Press et al.  
 272 (1992), correlation values and corresponding significance p-levels are obtained. A comparison  
 273 between the Pearson and Kendall correlation coefficients is found in Love et al. (2011), where  
 274 the statistical significance of the correlation between sunspots, geomagnetic activity, and  
 275 global temperature is tested.  
 276

### 277 ***Statistical significance of the amplitude of the time series power spectra***

278 Testing the statistical significance of the spectral peaks resulting from an analysis of a time  
 279 series is usually done by building a reference spectrum (background) and comparing the  
 280 amplitude spectrum of the analyzed time series to those of the background noise spectrum.  
 281 This spectrum is based on either white or most often red noise (Ghil et al. 2002, Torrence and  
 282 Campo, 1998). All amplitudes above the background noise amplitudes for a given  
 283 significance level are considered significant at that level. We checked the null hypothesis,  
 284 which in case of spectral analysis is that the time series has no significant peak and its spectral  
 285 estimate does not differ from the background noise spectrum. Rejection of the null hypothesis  
 286 means accepting spectral peaks that exceed a certain level of significance. As shown by Mann  
 287 and Less (1996), theoretical justifications exist for considering red noise as noise reference  
 288 (background) for climate and hydrological time series. Also, Allen and Smith (1996) show a  
 289 first-order autoregressive (AR1) process must be considered for the null hypothesis test, in  
 290 order that the analysis technique be useful in geophysical applications. If the white noise is  
 291 considered as the null hypothesis, it might incorrectly indicate a large number of oscillations  
 292 which are not significant.

293 The power spectra of this study were estimated by the multitaper method (MTM)  
 294 (Thomson, 1982; Ghil et al., 2002; Mann and Less, 1996). The MTM procedure is a  
 295 nonparametric technique that does not a priori require a model for the generation of time

296 series analysis, while the harmonic spectral analysis assumes that the data generation process  
 297 includes purely periodic components and white noise which are overlapped (Ghil et al., 2002).

298 In this study red noise was chosen as reference background spectrum. The significance  
 299 of spectrum peaks relative to the red noise background is based on the elementary sampling  
 300 theory (Gilman et al., 1963; Percival and Walden, 1986). Mares et al. (2016a) estimated the  
 301 background noise and the significance of power spectral peaks in case of the influence of the  
 302 Palmer drought indices on the Danube discharge.

303

## 304 **4 Results and discussion**

305

### 306 **4.1 Connection between atmospheric circulation at large scale and climate parameters** 307 **for the study area**

308

309 The atmospheric circulation at the large scale is quantified in this section by the North  
 310 Atlantic Oscillation index (NAOI), the Greenland Balkan Oscillation Index (GBOI) and  
 311 indices that highlight the blocking type circulation, such as the European blocking index  
 312 (EBI). A first result (Table 1) concerns the correlation between the first principal component  
 313 (PC1) for precipitation and NAO/GBO indices during winter, calculated for two time  
 314 intervals, 1916-1957 and 1958-1999. The opposite signs of the correlation coefficients in case  
 315 of NAO and GBO stem from the way the two indices are defined. The direct impact of NAO  
 316 is less pronounced than the GBO one for the surrounding areas of the lower Danube basin,  
 317 confirming previous investigations (Mares et al., 2013b, 2015a,b; 2016a,b). Also, the high  
 318 correlation between GBOI and precipitation is stable over time, as can be seen from the same  
 319 table.

320 In Fig. 3 we compare, for the winter season, the temporal evolution of the first  
 321 principal component (PC1) for the precipitation in the Danube basin with GBOI, for the time  
 322 interval 1959-1999; they show a high correlation, with a coefficient of 0.84.

323 In Fig. 4 the correlation coefficients between winter precipitation at each of the 15  
 324 stations of the study and winter NAOI and GBOI for two time intervals, 1916-1957 and 1958-  
 325 1999, are presented. Except for the first five stations, located in the upper basin of the  
 326 Danube, the correlation is high, with a stronger GBOI signal compared to the NAO one. The  
 327 correlation coefficients when the PC1 of precipitation is considered are higher and regard all  
 328 stations.

329

330

### 331 **4.2 Testing predictor variables for estimating the discharge in the Lower Danube basin** 332 **(1901-2000)**

333

334 The contribution to the Danube discharge in the lower basin (at Orsova) of the nine  
 335 predictors, described in Sections 2 and 3, is shown in Fig. 5 as correlation coefficients  
 336 between these predictors and the discharge, for each of the four seasons. The 99% confidence  
 337 level for the correlation coefficients for 100 values is reached for correlation coefficient  
 338 values in excess in comparison with the critical value of 0.254 (Brooks and Carruthers, 1953).  
 339 There are many predictors that are statistically significant at this level of confidence, but we  
 340 take into consideration only those having the highest correlation coefficients. As can be seen  
 341 from Fig. 5, the drought index (TPPI), that depends on the PC1 of precipitation and  
 342 temperature, brings the greatest contribution to the Danube discharge in seasons of spring,  
 343 summer and fall, with correlation coefficients ( $r$ ) of -0.450, -0.730, -0.700 respectively. In  
 344 winter season, the precipitation field in the upper and middle basin has the most important  
 345 contribution to the discharge in lower Danube basin ( $r = 0.500$ ). The second contribution is of

346 GBOI ( $r = 0.430$ ). Also, it can be seen that for the spring season, where contribution of the  
 347 drought index TPPI is lower than in summer and autumn, the GBOI and DTR can be  
 348 considered good predictors, with  $r = 0.420$  and, respectively,  $-0.417$ .

349 Considering predictors to the Danube discharge with some anticipation, significant  
 350 results obtained for an anticipation of a season are presented in Fig. 6. For spring discharge,  
 351 the best predictor is clearly the winter drought index ( $r = -0.62$ ). TPPI in spring is a significant  
 352 predictor ( $r = -0.55$ ) for summer discharge, along with the spring precipitation field (PC1\_PP)  
 353 ( $r = -0.53$ ). The highest predictability for the Danube discharge is found in spring, considering  
 354 TPPI during winter as predictor.

355 Rimbu et al. (2005) described the winter SST role in the predictability of spring  
 356 Danube discharge. Ionita et al. (2008) found stable teleconnections between SST, temperature  
 357 and precipitation during the winter season and the spring Elbe discharge. Our results related  
 358 to winter NAOI influence on the Danube discharge are in accordance with the ones obtained  
 359 by Bierkens and van Beek (2009), i. e. NAOI has an influence with a good statistical  
 360 significance, but we found that GBOI is better, especially for the Lower Danube basin.

361 Fig. 7 shows the spring Orsova discharge (standardized) in comparison with EBI and  
 362 GBOI for winter in the time interval 1948-2000. For this period, a good correlation is also  
 363 found in case of winter GBOI ( $R = 0.53$ ) and the atmospheric circulation of blocking type,  
 364 quantified by the European blocking index EBI ( $r = -0.54$ ), as predictors to the spring Danube  
 365 discharge at Orsova.

366 The opposite signs of the Orsova discharge correlations with EBI and GBOI are due  
 367 to the way the two indices are defined. The negative correlations between discharge and EBI  
 368 can be explained as follows. As shown by Davini et al. (2012), the midlatitude traditional  
 369 blocking localized over Europe, uniformly present in a band ranging from the Azores to  
 370 Scandinavia, leads to a relatively high pressure field in most of Europe. This field of high  
 371 pressure, that is not favorable for precipitation, defines a positive blocking index, and leads to  
 372 low Danube discharge at Orsova. A positive correlation coefficient between the Danube  
 373 discharge at Orsova and GBOI means that a positive GBO index leads to a low pressure in the  
 374 Danube basin area and therefore to a high discharge. The role of the atmospheric circulation  
 375 of blocking type on hydrological events in the Danube Basin is described in several  
 376 investigations, Blöschl et al. (2013) and Mares et al. (2015b). Lorenzo-Lacruz et al. (2011)  
 377 review the investigations on the interaction between river discharges and low-frequency  
 378 climate patterns; the authors specify that several studies have demonstrated the occurrence of  
 379 teleconnection patterns affecting the European climates, particularly in winter.

380 In the present study, the best predictor for the Danube discharge is found to be the  
 381 drought index TPPI, which is a simple index, easy to calculate. This index stores also effects  
 382 of SST or other phenomena at large scale such as ENSO or GBO on the temperature and  
 383 precipitation fields.

384 The results obtained in the present study are consistent with those of Mares et al.  
 385 (2016a), where the Palmer drought indices were found as good predictors for the discharge in  
 386 the lower basin. Papadimitriou et al. (2016) analyze the changes in future drought climatology  
 387 for five major European basins (including Danube) and estimate the impact of global  
 388 warming.

389

### 390 **4.3 Solar/geomagnetic signature in the climate fields in Danube basin**

391

392 As a solar activity indicator we used the sunspot number for the interval 1901-2000  
 393 and the 10.7 cm solar radio flux for the time interval 1948-2000. Although the solar flux is  
 394 closely correlated with sunspot numbers, these values are not identical, the correlation  
 395 coefficient varying with the season (0.98-0.99). The geomagnetic activity was quantified by



396 the *aa* index for both time intervals. Regarding the link between solar and geomagnetic  
 397 activity, details can be found in Demetrescu and Dobrica (2008).

398 The solar/geomagnetic signal was tested by correlative analyses (cross correlation with  
 399 lags between -1 to 15 years) composite maps and spectral analyses. Prior to the correlative  
 400 analysis, data were filtered using low- and band-pass filters for the terrestrial variables and  
 401 only band-pass filters for the solar/geomagnetic indices.

402

#### 403 **4.3.1 Zero-lag correlation analysis**

404 Results that have a higher than, or at least a 95% confidence level are given in Table 2,  
 405 for the analysis time-span of 100 years (1901-2000). Since not all variables have a normal  
 406 distribution, the Kendall's coefficient was associated to Pearson's coefficient. There were  
 407 cases when the difference between the two correlation coefficients was relatively high,  
 408 probably due to the statistical distribution that deviates from normal. Therefore, the  
 409 significant correlation indicated by the Pearson coefficient ( $r$ ) is analyzed together with the  
 410 Kendall correlation coefficient ( $\tau$ ) and their levels of significance ( $p$ ).

411 Three categories of data have been considered: non-filtered (UF), smoothed by low  
 412 pass filtering (LPF) to eliminate periods less than, or equal to 8 years, only for terrestrial  
 413 variables, and band pass filter (BPF) applied to both terrestrial and solar/geomagnetic indices.  
 414 Lines in bold face mean there are at least two situations for the same season (filtered or  
 415 unfiltered data) having a significant correlation coefficient (CL).

416 As can be seen from Table 2, smoothing time series led to improved correlation  
 417 coefficients; the most significant results were obtained by band-pass filters with frequency  
 418 corresponding to 9-15 yr. Tests were performed also for 17-28 yr band-pass filters, resulting  
 419 the highest correlation coefficients. However, because the effective number is very small  
 420 (about 5 years) due to the very high serial correlation caused by such filters, we consider that  
 421 for that kind of band-pass filters much larger sets of data are necessary. Reducing the number  
 422 of effective observations when smoothing is applied is discussed in Palamara and Bryant  
 423 (2004), where they test the statistical significance of the relationship between geomagnetic  
 424 activity and the Northern Annular Mode.

425 Highest correlations with *aa* were obtained during the summer season for temperature  
 426 ( $r = 0.796$ ) and for precipitation ( $r = -0.721$ ), for a smoothing by a 9-15yr BPF. Also, in  
 427 summer, it is worth mentioning the *aa* influence on the drought index (TPPI), with a  
 428 correlation coefficient of 0.787, for a 9-15 yr filtering. It can be noted that TPPI responds  
 429 better to the *aa* signal, compared to PC1\_PP.

430 Regarding solar activity signature in temperatures and precipitation, the highest  
 431 correlation coefficients were found for the fall season (0.699) and, respectively, for spring  
 432 (-0.538) in the filter band 9-15 yr. Correlations with the sunspot number having a particularly  
 433 high confidence level ( $> 99\%$ ) are observed in the case of 4-8 yr band smoothed time series,  
 434 such as the atmospheric circulation index GBOI (summer and winter).

435 The results obtained in the present investigation, referring to the temperature and  
 436 precipitation variables, are in general accordance with results of Dobrica et al. (2009; 2012),  
 437 which analyzed long time series (100–150 years) of temperature and precipitation annual  
 438 means from records of 14 meteorological stations in Romania. The correlations with the  
 439 geomagnetic *aa* index and the sunspot number have the same sign, i. e. positive for  
 440 temperatures and negative for precipitation, in spite of rather different areas of investigation  
 441 (but subject to the same large-scale atmospheric circulation), smoothing procedure and  
 442 separate analysis for individual seasons.

443 Taking into account both possible signals, of the geomagnetic and of solar activity, we  
 444 can notice that during spring TPPI has the best response for unfiltered or filtered time series.  
 445 The unfiltered time series for *aa* and sunspot number are presented in Fig. 8, in comparison

446 with TPPI for 1901-2000. The solar flux from 1948 is also plotted. Correlation coefficients  
 447 between TPPI and *aa*, and TPPI and sunspot number are 0.275 and respectively 0.211, with a  
 448 confidence levels of 99% and 95% (Table 2 for TPPI (UF)).

449 As regards the solar/geomagnetic signals in the Danube discharge at Orsova, we found  
 450 that *aa* is associated with the discharge (ORS\_Q), with highest significance during the  
 451 summer season ( $r = -0.656$ ). However, considering our criterion to have significant  
 452 correlations in at least two cases, the fall data, for which the smoothing by LPF and BPF (9-  
 453 15) also show a significant association with *aa*, are of interest.

454 In the following, some results obtained for the time interval 1948-2000, for which the  
 455 blocking type circulation indices and the 10.7 cm solar flux are available, are given in Table  
 456 3. We note that due to short time series, of only 53 years, although the smoothing by the band  
 457 pass filter 9-15 yr leads to correlation coefficients with high confidence level, the number of  
 458 degrees of freedom is quite small in this case. The smoothing by a 4-8 yr BPF appears most  
 459 appropriate for highlighting a possible solar /geomagnetic signal in the blocking indices, with  
 460 an intensification of the activity of blocking circulation, when the activity of the external  
 461 factors increase. Considering the *aa* index influence on the blocking indices, the most  
 462 significant relationship is obtained for the European region (EBI), where all statistics leads to  
 463 a significance higher 99%. A possible influence of solar activity is evidenced during the  
 464 winter for EBI, and in autumn for ABI and AEBI.

465 Links between solar / geomagnetic activity, and climate events at large scale such as  
 466 ENSO, taking into account the periodicities smaller (such as 4 - 8 years) than the well-known  
 467 11-year cycle, were found in several investigations including Narasimha and Bhattacharyya  
 468 (2010) and Sunkar and Tiwari (2016).

469

#### 470 **4.3.2. Power spectra**

471 The association between solar or geomagnetic variability with the terrestrial climate  
 472 variability can be signaled out also by estimating periodicities in the climate time series by  
 473 means of power spectra. In the present study the power spectra were estimated by means of  
 474 the multitaper method (MTM). Unfiltered time series are used, in order to see whether there is  
 475 solar/geomagnetic signature in climate data. For the time series of unfiltered European  
 476 blocking index (EBI) during winter, the power spectra given in Fig. 9a reveal that the most  
 477 significant periodicity is related to QBO (2.4 years). The peaks at 10.7 and 14.2 years, which  
 478 may be linked to the 11-year solar/geomagnetic cycle, are determined with an approximately  
 479 90% confidence level. In case of spring EBI (Fig. 9b), the only significant peak with a  
 480 confidence level of 95% corresponds to a period of 10 years. This is consistent with the  
 481 results shown in Table 3, where during spring, the time series of blocking index EBI, both  
 482 unfiltered and 4-8 yr band-pass filtered, have significant correlations with the *aa* geomagnetic  
 483 index. Also, in winter, the possible response of EBI to solar activity quantified by the 10.7 cm  
 484 solar flux is statistically significant with CL almost 99%. A significant peak related to QBO  
 485 (Fig. 9c) is found for the spring blocking index over the Atlantic European region (AEBI).

486

#### 487 **4.3.3 Lagged Correlation Analysis**

488 To see if there is a link with some delay between solar or geomagnetic indices and  
 489 climate variables considered in this study, we performed correlative analyses with lags from  
 490 -1 to 15 years. As with the zero-lag correlations, three variable types, i.e. unfiltered, low-pass  
 491 and band-pass filter smoothed data, have been considered.

492 For the 1901-2000 time-span, the most significant correlation coefficient (CL > 99%)  
 493 with the geomagnetic *aa* index was obtained for the 9-15 yr BPF summer drought index TPPI  
 494 at a lag of 1 ( $r = 0.885$ ) and 2 years (0.730). In this case, the effective number was 16. This  
 495 result is supported by the ones obtained in case of LPF smoothing, for which the correlation

496 coefficients had a CL of 95%, with the effective number 34. Similar results were obtained for  
 497 the correlation between TPPI and sunspot numbers, with a correlation coefficient slightly  
 498 lower than in case of *aa*.

499 A variable that is associated with the solar activity even more significantly than to the  
 500 geomagnetic index, is the atmospheric circulation index GBO in summer. Fig. 10 is a  
 501 summary for the three types of time series. The correlation coefficient between the sunspot  
 502 number and unfiltered GBOI does not show any statistical significance no matter of the lag  
 503 value. For the LPF smoothed GBO index, the correlation is significant at a lag of 3yr (95%).  
 504 At this lag, the 9-15 yr BFP time series shows a high statistical significance (CL ~ 99%).  
 505 Accordingly, in the summer, at 2-3 years after a maximum (minimum) of solar activity, a  
 506 diminution of GBO index is possible, i. e. a decrease (increase) of atmospheric pressure in  
 507 Greenland area and an increase (decrease) of the pressure in the Balkans might happen.

508 A possible response of the atmospheric circulation index GBOI to solar variability  
 509 with a delay of 2-3 years, is due to the ocean-atmosphere interactions, as described by  
 510 Thiéblemont et al. (2015), who analyzed the solar signal in NAOI. The authors propose a new  
 511 synchronization mechanism that combines air–sea interaction processes and solar-induced  
 512 stratospheric dynamics modulation to simulate the observed solar influences on North  
 513 Atlantic climate, using a coupled ocean-atmosphere model under two versions. The results  
 514 obtained in this paper based only on statistical methods, are in accordance with the ones  
 515 reported by Thiéblemont et al. (2015), as the most significant link between NAOI and solar  
 516 flux is found for lags between 1 and 3 years, with correlation coefficients of around 0.6, for the  
 517 9-13 years band pass filtered data. The correlation coefficients between solar flux and GBOI  
 518 in Fig. 10 are negative, due to GBOI definition in comparison with the NAOI. Zanchettin et  
 519 al. (2008) demonstrate the NAO role in the modulation of the link between Sun and discharges  
 520 in the northern Italy.

521 Regarding the time interval of 53 years (1948-2000), significant links between the  
 522 solar activity quantified by the 10.7 cm solar flux and the Danube discharge at Orsova were  
 523 obtained for spring and summer, with different lags. With a delay of 2 years, both unfiltered  
 524 and filtered time series of the Danube discharge indicate statistically significant correlations  
 525 with solar flux.

526 Like in the GBOI case, the discharge is oppositely, but well correlated with solar  
 527 activity at some lags. In Fig. 11a, correlation coefficients are shown at lags between -1 and 15  
 528 yr, for unfiltered (UF), low pass filter (LPF), and 9-15 yr band pass filter smoothed time  
 529 series. It can be noticed that, if for the unfiltered data the correlation is significant (95%) at  
 530 lags of 1, 2 and 3 yr, for BPF smoothed data, the significance is situated between 95-99% at  
 531 lags of 2, 3, and 4 yr. Taking into account the LPF smoothed discharge, the most significant  
 532 correlation (90%) is obtained when the taken discharge values have delays of 2 and 3 years  
 533 from the solar flux.

534 In Fig. 11b the coherent time evolutions of the solar flux and of the 9-15 yr BPF  
 535 smoothed discharge, with a lag of 3 years for which the correlation coefficient is highest  
 536 (-0.769) and CL is 99% have been shown.

537 From the above results, we can expect that at 2 or 3 years after a maximum  
 538 (minimum) solar activity, the spring discharge to be lower (higher). In Fig. 11c, the power  
 539 spectra for the Danube discharge during spring indicates significant peaks at 4 yr (CL close to  
 540 95%) and at 10.7 yr, with a CL near 90%. These peaks might be associated with the internal  
 541 atmospheric variability and respectively with the solar variability. Peaks of power spectra  
 542 associated with the solar variability for the discharge in other regions of the world, are found  
 543 by Tomasino and Valle (2000), Landscheidt (2000), Compagnucci et al. (2014).

544 Although our results are obtained from relative short time series, they are consistent  
 545 with results found by Pena et al. (2015). These authors investigated the summer floods in

546 Switzerland for more than 300 years and concluded that high frequency of flooding is related  
 547 to solar activity minimum, and that a summer flood damage index shows a significant  
 548 component with a frequency corresponding to 10-12 years.

549 A different possible signature of solar activity was found in the time series of the  
 550 index that defines atmospheric circulation of blocking type over Atlantic-European region, for  
 551 the period 1948-2000, during the winter season. As can be seen in Fig. 12, a possible response  
 552 of blocking circulation to the solar activity is given by significant correlations with a delay of  
 553 2 and 3 years to the solar flux. It is worth noting that in this case, the filtering process does not  
 554 lead to an improvement of the significance of the correlation, even if the value of the  
 555 correlation coefficient increases. Accordingly, we might conclude that about 2-3 years after a  
 556 maximum (minimum) solar activity, during winter, the atmospheric circulation of the  
 557 blocking type is enhanced (weakened) over the Atlantic-European region.

558

#### 559 ***4.3.4 QBO role in modulation of the influence of solar forcing***

560 Regarding QBO influence on the relationship between solar activity and terrestrial  
 561 parameters, there are several investigations (Van Loon and Labitzke, 1988; Bochníček et  
 562 al.1999, Huth et al., 2009) which demonstrated that the QBO phase is very important for  
 563 emphasizing these links. We see in QBO mainly an important modulator of the impact of  
 564 solar activity on lower troposphere processes. To test this hypothesis, in this paper we  
 565 selected the winter months in years with East QBO phase, and correlations between solar flux  
 566 and terrestrial variables were calculated.

567 The correlation coefficient between the solar flux and the unfiltered winter EBI for all  
 568 those 53 years, is 0.15 and not statistically significant. By selecting only the years with QBO  
 569 in the East phase in the winter months (34 cases), the correlation coefficient is 0.32 at the  
 570 confidence level around 95%. It is interesting that although the power spectrum (Fig. 9a)  
 571 highlights significant peaks related to the QBO (2.4 and 2.7 years), the correlation coefficient  
 572 between EBI and QBO is insignificant. This suggests that the spectral representation is very  
 573 useful in time series analysis and the QBO phases modulate the connection between solar  
 574 activity and blocking circulation. These findings related with the QBO role are in accordance  
 575 with the results obtained by Barriopedro et al. (2008), Huth et al., (2009), Sfičá et al. (2015).  
 576 Cnossen and Lu (2011) presented some of the mechanisms which explain the QBO role in the  
 577 solar signature in climate variables. These mechanisms have been supported by both  
 578 observational and modeling studies, but some of them are yet unclear.

579 Composite maps enlighten the solar impact on atmospheric circulation in the lower  
 580 troposphere, during the East phase of QBO, when the solar maximum is associated with  
 581 blocking event over the northern Atlantic and north-western Europe (Fig. 13a), and the solar  
 582 minimum to a geopotential with an opposite distribution (Fig.13b). Sfičá et al. (2015) specify  
 583 that through these composite maps nonlinearities are taken into account, at odds to using  
 584 linear methods. Barriopedro et al. (2008) found similar results, namely QBO is a modulator of  
 585 the transformation of atmospheric circulation from a blocking type circulation to a zonal one  
 586 and vice versa, under the solar impact.

587 We mention that during 1948-2000, 34 winter months (DJF) were recorded in which  
 588 East QBO phase occurred and the solar flux has produced atmospheric blocking events in the  
 589 lower troposphere, or a zonal atmospheric circulation at middle and higher latitudes,  
 590 depending on the state of maximum or minimum solar activity, respectively.

591

592

593

594

## 595 **5 Conclusions**

596

597 In the present investigation, we focused on finding predictors for the discharge in the  
598 Lower Danube basin, which present a high level of statistical significance.

599

600 In the first part of the paper we tested predictors for the discharge, from the fields of  
601 temperature, precipitation, cloud cover in the Danube basin, and indices of atmospheric  
602 circulation over the Atlantic-European region. Each of the temperature, precipitation and  
603 cloud cover fields in the Danube basin was decomposed in EOFs, and as predictors were  
604 considered only the first principal component (PC1). A drought index (TPPI), derived from  
605 the standardized PC1 of the temperature and the precipitation, was also taken as predictor for  
606 the discharge in the Lower Danube basin.

606

607 The atmospheric circulation has been quantified by Greenland-Balkan Oscillation  
608 (GBO) and North Atlantic Oscillation (NAO) indices and the blocking type indices. The  
609 analysis was performed separately for each season in two time intervals, 1901-2000 and 1948-

609

610 The main statistically significant results for this part of our research are the following:

611

612

613

614

615

616

617

618

619

620

621

622

623

624

625

626

627

628

629

630

631

632

633

634

635

636

637

638

639

640

641

642

643

1. The zero-lag correlative analyses for each season revealed that, except for the winter season, the drought index (TPPI) has the highest weight for the discharge variability in the Lower Danube basin;
2. Testing the predictors with a lag of several months in advance of discharge, we concluded that TPPI in winter and spring is a good indicator for the Danube discharge in spring and summer respectively;
3. The winter GBOI has a more significant influence on the climate variables in the Danube middle and lower basin than NAOI;
4. Analysis for the period 1948-2000 reveals that in winter the GBOI weight for the Danube discharge is similar to that of the blocking index over the European sector.

622 In the second part of the paper, we focused on the solar/geomagnetic impact on the  
623 terrestrial variables. Because the solar and geomagnetic variables, as well as the smoothed  
624 time series by means of various filters (low-pass and band-pass) applied in this investigation,  
625 show strong serial correlations, all correlative analyses were performed through rigorous  
626 testing of statistical significance. The number of observations was reduced to the effective  
627 number of degrees of freedom, corresponding to independent observations. The main findings  
628 of our research for this topic are the following:

5. The most significant signatures of solar/geomagnetic variability were evidenced in the drought indicator (TPPI). Because the precipitation does not respond just as well as temperatures to the solar variability, the analysis of the TPPI variable instead of temperatures and precipitation separately is preferable;
6. From the analysis of correlations with delays of the terrestrial variables in comparison with the solar/geomagnetic activity from -1 to 15 years, we obtained very different results, depending on the season and on the considered variables, as well as on the filtering procedure. Accordingly, we might conclude that in winter, about 2-3 years after a maximum (minimum) solar activity, the atmospheric circulation of blocking type is enhanced (weakened) over the Atlantic-European region. Also, it was found that the Danube discharge in the lower basin, during spring and summer, will be lower (higher) at 2 or 3 years after a solar maximum (minimum);
7. An atmospheric index that is associated with the solar variability is the atmospheric circulation index GBO in summer. At 2-3 years after a maximum (minimum) of solar activity, one can expect a change of atmospheric circulation in the Atlantic-European region, quantified by GBOI, shown by a diminution of this index, i. e. a decrease

644 (increase) of pressure in Greenland area and an increase (decrease) in atmospheric  
645 pressure in the Balkans;

- 646 8. The power spectra obtained by the multitaper method (MTM) have highlighted quasi-  
647 periodicities related to solar activity and to other oscillations such as QBO. In the time  
648 series of AEBI (spring), and EBI (winter) the most significant periodicity is related to  
649 QBO (2.2-2.7 years). Also, at an approximately 90% confidence level there are peaks  
650 at 10-14 years, which may be linked to the 11-year solar cycle;
- 651 9. The composite maps revealed that the solar maximum impact on atmospheric  
652 circulation in the middle troposphere during the East phase of QBO is associated with  
653 a blocking event over the northern Atlantic and north-western Europe. A geopotential  
654 with an opposite distribution occurs during the solar minimum.

655 In this study, we focused only on observational data, so in our next investigations we  
656 shall consider outputs of climate simulation models, from which significant predictors for the  
657 Danube basin found in this investigation, like GBOI, TPPI and atmospheric blocking indices,  
658 will be calculated and tested.

659

660 *Acknowledgements.* This study has been performed under VALUE: COST Action ES1102.

661 We thank the two anonymous referees for rigorous and constructive comments and  
662 suggestions that served to improve this study.

663

## 664 **References**

665

666 Allen, Myles R., and Smith, L. A.: "Monte Carlo SSA: Detecting irregular oscillations in the  
667 presence of colored noise.", *Journal of Climate* 9, no. 12 , 3373-3404, 1996.

668 Ault, T. R., Cole, J. E., and George S. St.: The amplitude of decadal to multidecadal  
669 variability in precipitation simulated by state-of-the-art climate models, *Geophysical*  
670 *Research Letters* 39, no.21, 2012.

671 Barriopedro, D., Garcia-Herrera, R., and Huth, R.: Solar modulation of Northern Hemisphere  
672 winter blocking, *J. Geophys. Res.*, 113, D14118, doi: 10.1029/2008JD009789, 2008.

673 Benestad, R.E.: Schmidt GA: Solar trends and global warming, *J. Geophys. Res.* 114:D14101,  
674 doi: 10.1029/2008JD011639, 2009.

675 Bierkens, M. F. P. and Van Beek, L. P. H.: Seasonal Predictability of European Discharge:  
676 NAO and Hydrological Response Time, *J. Hydrometeorol.*, 10, 953–968, 2009.

677 Blöschl, G., Nester, T., Komma, J., Parajka, J., and Perdigão, R. A. P.: The June 2013 flood in  
678 the Upper Danube Basin, and comparisons with the 2002, 1954 and 1899 floods, *Hydrol.*  
679 *Earth Syst. Sci.*, 17, 5197–5212, doi: 10.5194/hess-17-5197-2013, 2013.

680 Bochníček, J., Hejda, P., and Pýcha, J.: The effect of geomagnetic and solar activity on the  
681 distribution of controlling pressure formations in the Northern Hemisphere in winter,  
682 *Studia geophysica et geodaetica*, 43(4), 390-398, 1999.

683 Bretherton, C.S., Widmann, M., Dymnikov, V.P., Wallace, J.M., and Bladé, I.: The effective  
684 number of spatial degrees of freedom of a time-varying field, *Journal of climate*, 12(7),  
685 1990-2009, 1999.

686 Brooks, C. E. P., and Carruthers, N.: *Handbook of statistical methods in meteorology.*  
687 Her Majesty's Stationery Office, London, 1953, 413 pp. 1953.

688 Brugnara, Y., Brönnimann, S., Luterbacher, J., and Rozanov, E.: Influence of the sunspot  
689 cycle on the Northern Hemisphere wintertime circulation from long upper-air data sets,  
690 *Atmos. Chem. Phys.*, 13, 6275-6288, doi:10.5194/acp-13-6275-2013, 2013.

691 Butterworth, S., On the theory of filter amplifiers, *Wireless Engineer*, 7, 536-541, 1930.

692 Cnossen, I., and Lu, H.: The vertical connection of the quasi-biennial oscillation-modulated  
693 11 year solar cycle signature in geopotential height and planetary waves during Northern

- 694 Hemisphere early winter, *J. Geophys. Res.*, 116, D13101, doi:10.1029/2010JD015427,  
695 2011.
- 696 Compagnucci, R. H., Berman, A. L., Herrera, V. V., and Silvestri G.: Are southern South  
697 American Rivers linked to the solar variability?. *International Journal of Climatology* 34,  
698 no. 5, 1706-1714, 2014.
- 699 Cubasch, U., Voss, R., Hegerl, G.C., Waszkewitz, J. and Crowley, T.J.: Simulation of the  
700 influence of solar radiation variations on the global climate with an ocean-atmosphere  
701 general circulation model, *Climate Dynamics*, 13(11), 757-767, 1997.
- 702 Davini, P., Cagnazzo, C. Gualdi, S., and Navarra, A.: Bidimensional Diagnostics, Variability,  
703 and Trends of Northern Hemisphere Blocking, *J. Climate*, 25, 6496–6509, 2012.
- 704 Demetrescu, C. and Dobrica, V.: Signature of Hale and Gleissberg solar cycles in the  
705 geomagnetic activity, *J. Geophys. Res.*, 113, A02103, doi: 10.1029/2007JA012570, 2008.
- 706 Dima, M., Lohmann, G., and Dima I.: Solar-Induced And Internal Climate Variability at  
707 decadal time scales, *Int. J. Climatol.*, 25: 713–733, 2005.
- 708 Dobrica, V., C. Demetrescu, Boroneant, C. and Maris G.: Solar and geomagnetic activity  
709 effects on climate at regional and global scales: Case study-Romania, *J. Atmos. Sol.-Terr.  
710 Phy.*, 71 (17-18), 1727-1735, doi: 10.1016/j.jastp.2008.03.022, 2009.
- 711 Dobrica V, Demetrescu, C.: On the evolution of precipitation in Central and South-Eastern  
712 Europe and its relationship with Lower Danube discharge, in: *AGU Fall Meeting  
713 Abstracts*, 11, 1030, 2012.
- 714 Drobyshev, I., Niklasson, M., Linderholm, H.W., Seftigen, K., Hickler, T., Eggertsson, O.:  
715 Reconstruction of a regional drought index in southern Sweden since AD 1750, *The  
716 Holocene* 21(4) 667-679, doi: 10.1177/0959683610391312, 2011.
- 717 Ebisuzaki, W.: A Method to Estimate the Statistical Significance of a Correlation when the  
718 Data is Serially Correlated, *J. Climate*, 10:2147–2153, 1997.
- 719 Echer, M. S., Echer, E., Nordemann, D. J. R., and Rigozo, N. R.: Multi-resolution analysis of  
720 global surface air temperature and solar activity relationship, *Journal of Atmospheric and  
721 Solar-Terrestrial Physics*, 71(1), 41-44, 2009.
- 722 Echer, M.S., Echer, E., Rigozo, N.R., Brum, C.G.M., Nordemann, D.J.R., and Gonzalez,  
723 W.D.: On the relationship between global, hemispheric and latitudinal averaged air surface  
724 temperature (GISS time series) and solar activity, *Journal of Atmospheric and Solar-  
725 Terrestrial Physics*, 74, pp.87-9, 2012.
- 726 El-Janyani, S., Massei, N., Dupont, J.P., Fournier, M. and Dörfliger, N.: Hydrological  
727 responses of the chalk aquifer to the regional climatic signal, *Journal of Hydrology*, 464,  
728 485-493, 2012.
- 729 Ghil, M., Allen, M.R., Dettinger, M.D., Ide, K., Kondrashov, D., Mann, M.E., Robertson,  
730 A.W., Saunders, A., Tian, Y., Varadi, F., and Yiou, P.: Advanced spectral methods for  
731 climatic time series, *Reviews of Geophysics* 40 (1), doi: 10.1029/2001RG000092, 2002.
- 732 Gilman, D. L., Fuglister, F. J., and Mitchell, J. M. : On the power spectrum of “red noise”, *J  
733 Atmos Sci* 20:182–184, 1963.
- 734 Gray L. J., Beer, J., Geller, M., Haigh, J., Lockwood, M., Matthes, K., Cubasch, U.,  
735 Fleitmann, D., Harrison, G., Hood, L., Luterbacher, J., Meehl, G., Shindell, D., van Geel,  
736 B., and White, W.: Solar influences on climate. *Reviews of Geophysics*, 48: RG4001.  
737 DOI: 10.1029/2009RG000282, 2010.
- 738 Gray, L. J., Scaife, A. A., Mitchell, D. M., Osprey, S., Ineson, S., Hardiman, S., Butchart, N.,  
739 Knight, J., Sutton, R., and Kodera K.: A lagged response to the 11 year solar cycle in  
740 observed winter Atlantic/Euro pean weather patterns, *J. Geophys. Res. Atmos.*, 118, 13,  
741 405–13, 420, doi: 10.1002/2013JD020062, 2013.

- 742 Hertig, E., Beck, C., Wanner, H., and Jacobeit, J.: A review of non-stationarities in climate  
743 variability of the last century with focus on the North Atlantic-European sector, *Earth-*  
744 *Science Reviews* 147, 1–17, doi:[10.1016/j.earscirev.2015.04.009](https://doi.org/10.1016/j.earscirev.2015.04.009), 2015.
- 745 Hurrell, J.W., Kushnir, Y., Visbeck, M., and Ottersen, G.: Research Abstracts EGU2007-A-  
746 08910  
747 9:1029-2003. An overview of the North Atlantic Oscillation. In: Hurrell, J.W., Kushnir,  
748 Y., Ottersen, G., Visbeck, M. (Eds.), *The North Atlantic Oscillation, Climatic Significance*  
749 *and Environmental Impact*, AGU Geophysical Monograph, 134, 1–35, 2003.
- 750 Huth, R., Pokorná, L., Bochníček, J., and Hejda, P.: Combined solar and QBO effects on the  
751 modes of low-frequency atmospheric variability in the Northern Hemisphere, *Journal of*  
752 *Atmospheric and Solar-Terrestrial Physics*, 71(13), 1471-1483, 2009.
- 753 Ionita, M., Lohmann, G., and Rimbu, N.: Prediction of spring Elbe discharge based on stable  
754 teleconnections with winter global temperature and precipitation. *Journal of Climate* 21,  
755 no. 23, 6215-6226, 2008.
- 756 Landscheidt, T.: River Po discharges and cycles of solar activity. *Hydrological Sciences*  
757 *Journal*, 45(3), 491-493, 2000.
- 758 Lejenas, H., and Okland, H.: Characteristics of Northern Hemisphere blocking as determined  
759 from a long time series of observational data, *Tellus*, 35A, 350-362, 1983.
- 760 Lohmann, G., Rimbu, N., and Dima, M.: Climate signature of solar irradiance variations:  
761 analysis of long-term instrumental, historical, and proxy data, *International Journal of*  
762 *Climatology*, 24(8), pp. 1045-1056, 2004.
- 763 Lorenzo-Lacruz, J., Vicente Serrano, S. M., López-Moreno, J. I., González-Hidalgo, J.C.,  
764 and Morán-Tejeda, E.: The response of Iberian rivers to the North Atlantic Oscillation. 2011.
- 765 Love, J. J., Mursula, K., Tsai, V. C., and Perkins, D. M.: Are secular correlations between  
766 sunspots, geomagnetic activity, and global temperature significant?, *Geophys. Res. Lett.*,  
767 38, L21703, doi: [10.1029/2011GL049380](https://doi.org/10.1029/2011GL049380), 2011.
- 768 Mann, M. E., and Lees, J.: Robust estimation of background noise and signal detection in  
769 climatic time series, *Climatic Change*, 33, 409–445, 1996.
- 770 Mann, M. E.: On smoothing potentially non-stationary climate time series, *Geophys. Res.*  
771 *Lett.*, 31, L07214, doi: [10.1029/2004GL019569](https://doi.org/10.1029/2004GL019569), 2004.
- 772 Mann, M. E.: Smoothing of climate time series revisited, *Geophys. Res. Lett.*, 35, L16708,  
773 doi: [10.1029/2008GL034716](https://doi.org/10.1029/2008GL034716), 2008.
- 774 Mares, I., Mares, C., Mihăilescu, M., Capsună, S., and Chirovici, M.: Study of the extreme  
775 events in Romania in the regional climate context. *International Symposium on Applied*  
776 *Agrometeorology and Agroclimatology*, 24-26 April, Volos, Greece, 25-36, 1996.
- 777 Mares, I., Mares, C., and Mihăilescu, M.: NAO impact on the summer moisture variability  
778 across Europe, *Physics and chemistry of the Earth*, 27, 1013-1017, 2002.
- 779 Mares, C., Mares, I. and Stanciu, A.: Extreme value analysis in the Danube lower basin  
780 discharge time series in the 20<sup>th</sup> century, *Theoretical and Applied Climatology*, 95, 223-  
781 233, 2009.
- 782 Mares, I., Mareş, C. and Mihăilescu M.: On the statistical significance of the sea level  
783 pressure climatic signal simulated by general circulation models for the 21<sup>st</sup> century over  
784 Europe. *Rev. Roum. Géophysique*, 25–40, 2013a.
- 785 Mares, I., Mareş, C., and Mihailescu, M.: Stochastic modeling of the connection between sea  
786 level pressure and discharge in the Danube lower basin by means of Hidden Markov  
787 Model, *EGU General Assembly Conference Abstracts*, 15, 7606, 2013b.
- 788 Mares, C., Adler M. J., Mares I, Chelcea, S., Branescu, E.: Discharge variability in Romania  
789 using Palmer indices and a simple atmospheric index of large-scale circulation,  
790 *Hydrological Sciences Journal*, doi: [10.1080/02626667.2015.1006233](https://doi.org/10.1080/02626667.2015.1006233), 2015a.



- 791 Mares, I., Dobrica, V., Demetrescu, C., and Mares, C.: Influence of the atmospheric blocking  
792 on the hydrometeorological variables from the Danube basin and possible response to the  
793 solar/geomagnetic activity, *Geophysical Research Abstracts*, 17, EGU2015-4154-3, 2015,  
794 EGU General Assembly 2015 (PICO2.6), 2015b.
- 795 Mares, C., Mares, I., and Mihailescu, M.: Identification of extreme events using drought  
796 indices and their impact on the Danube lower basin discharge, *Hydrological Processes*,  
797 doi: 10.1002/hyp. 10895), 2016a.
- 798 Mares, I., Dobrica, V., Demetrescu, C., and Mares, C.: Hydrological response in the Danube  
799 lower basin to some internal and external forcing factors of the climate system,  
800 *Geophysical Research Abstracts*, 18, EGU2016-7474, EGU General Assembly 2016b.
- 801 Massei, N., Laignel, B., Deloffre, J., Mesquita, J., Motelay, A., Lafite, R., and Durand, A.:  
802 Long-term hydrological changes of the Seine River flow (France) and their relation to the  
803 North Atlantic Oscillation over the period 1950–2008, *International Journal of*  
804 *Climatology*, 30(14), pp.2146-2154, 2010.
- 805 Narasimha, R., and Bhattacharyya S. : A wavelet cross-spectral analysis of solar–ENSO–  
806 rainfall connections in the Indian monsoons. *Applied and Computational Harmonic*  
807 *Analysis* 28, no. 3 : 285-295, 2010.
- 808 Palamara, D. R., and Bryant, E.A.: March. Geomagnetic activity forcing of the Northern  
809 Annular Mode via the stratosphere, in: *Annales Geophysicae*, 22, No. 3, 725-731, 2004.
- 810 Papadimitriou, L. V., Koutroulis, A. G., Grillakis, M. G., and Tsanis, I. K.: High-end climate  
811 change impact on European runoff and low flows – exploring the effects of forcing biases,  
812 *Hydrol, Earth Syst. Sci.*, 20, 1785-1808, doi:10.5194/hess-20-1785-2016, 2016.
- 813 Ped, D. A.: On indicators of droughts and wet conditions (in Russian). *Proc. USSR*  
814 *Hydrometeor. Centre*, 156, 19–39, 1975.
- 815 Peña, J.C., Schulte, L., Badoux, A., Barriendos, M., and Barrera-Escoda, A.: Influence of  
816 solar forcing, climate variability and modes of low-frequency atmospheric variability on  
817 summer floods in Switzerland. *Hydrology and Earth System Sciences*, 19(9), pp.3807-  
818 3827, 2015.
- 819 Percival, D. B., and Walden, A. T.: *Spectral Analysis for Physical Applications*, Cambridge  
820 University Press, Cambridge, UK., 1986.
- 821 Perry, C.A.: Evidence for a physical linkage between galactic cosmic rays and regional  
822 climate time series. *Advances in Space Research*, 40(3), pp.353-364, 2007.
- 823 Press, W. H., Teukolsky, S. A., Vetterling, W.T., and Flannery, B. P.: *Numerical Recipes*,  
824 Cambridge Univ. Press, Cambridge, U. K., 1992
- 825 Prestes, A., Rigozo, N. R., Nordemann, D. J. R., Wrasse, C. M., Echer, M. S., Echer, E., ...  
826 and Rampelotto, P. H.: Sun–earth relationship inferred by tree growth rings in conifers  
827 from Severiano De Almeida, Southern Brazil, *Journal of Atmospheric and Solar-*  
828 *Terrestrial Physics*, 73(11), 1587-1593, 2011.
- 829 Rai, R. K., Upadhyay, A., Ojha, C. S. P., and Lye L. M.: Statistical analysis of hydro-climatic  
830 variables. RY Surampalli, TC Zhang, CSP Ojha, BR Gurjar, RD Tyagi and CM Kao (ed.  
831 2013), *Climate change modelling, mitigation, and adaptation*. Reston, VA: ASCE. doi 10,  
832 no. 9780784412718, 378-388, 2013
- 833 Rimbu, N., Boroneanț, C., Buță, C., and Dima M.: Decadal variability of the Danube river  
834 flow in the lower basin and its relation with the North Atlantic Oscillation, *International*  
835 *Journal of Climatology*., 22(10):1169-79, 2002.
- 836 Rimbu, N., and Lohmann, G.: Winter and summer blocking variability in the North Atlantic  
837 region–evidence from long-term observational and proxy data from southwestern  
838 Greenland, *Climate of the Past*, 7(2), 543-555, 2011.

- 839 Rimbu, N., Dima, M., Lohmann, G. and Musat, I.: Seasonal prediction of Danube flow  
840 variability based on stable teleconnection with sea surface temperature, *Geophysical*  
841 *Research Letters*, 32(21), 2005.
- 842 Scaife, A. A., Ineson, S., Knight, J. R., Gray, L.J., Kodera, K., and Smith, D. M.: A  
843 mechanism for lagged North Atlantic climate response to solar variability, *Geophys. Res.*  
844 *Letts.*, 40, 434–439, doi:10.1002/grl.50099, 2013.
- 845 Sfică, L., Voiculescu, M., and Huth, R.: The influence of solar activity on action centres of  
846 atmospheric circulation in North Atlantic, *Ann. Geophys.*, 33, 207-215,  
847 doi:10.5194/angeo-33-207-2015, 2015.
- 848 Sunkara, S. L. and Tiwari, R. K.: Wavelet analysis of the singular spectral reconstructed time  
849 series to study the imprints of solar–ENSO–geomagnetic activity on Indian climate,  
850 *Nonlin. Processes Geophys.*, 23, 361-374, doi:10.5194/npg-23-361-2016, 2016.
- 851 Tapping, K.F. : The 10.7 cm solar radio flux (F10.7), *Space Weather*, 11(7), 394-406, 2013.
- 852 Thiebaux, H. J., and Zwiers, F. W.: The interpretation and estimation of effective sample size,  
853 *J. Climate Appl. Meteor.*, 23, 800–811, 1984.
- 854 Thiéblemont, R., Matthes, K., Omrani, N-E. Kodera, K., and Hansen, F. : Solar forcing  
855 synchronizes decadal North Atlantic climate variability. *Nature communications* 6, 2015.
- 856 Thomson, D. J.: Spectrum estimation and harmonic analysis, *IEEE Proc.*, 70, 1055-1096,  
857 1982.
- 858 Tomasino, M., and Valle, F. D. : Natural climatic changes and solar cycles: an analysis of  
859 hydrological time series. *Hydrological sciences journal*, 45(3), 477-489, 2000.
- 860 Torrence, C., and Compo, G. P.: A practical guide to wavelet analysis. *Bull. Amer. Meteor.*  
861 *Soc.*, 79, 61–78, 1998.
- 862 Trenberth, K. E., and Paolino, D. A.: The Northern Hemisphere sea level pressure data set:  
863 Trends, errors, and discontinuities, *Mon. Weather Rev.* 108: 855-872, 1980.
- 864 Turki, I., Laignel, B., Massei, N., Nouaceur, Z., Benhamiche, N., and Madani, K.:  
865 Hydrological variability of the Soummam watershed (Northeastern Algeria) and the  
866 possible links to climate fluctuations, *Arabian Journal of Geosciences*, 9(6), 1-12, 2016.
- 867 Valty, P., De Viron, O., Panet, I., and Collilieux, X.: Impact of the North Atlantic Oscillation  
868 on Southern Europe Water Distribution: Insights from Geodetic Data. *Earth*  
869 *Interactions*, 19 (10), 1-16, 2015.
- 870 Van Loon H. and Labitzke, K: Association between the 11-Year Solar Cycle, the QBO, and  
871 the Atmosphere. Part II: Surface and 700 mb in the Northern Hemisphere in Winter, *J.*  
872 *Climate*, 1, 905–920, 1988.
- 873 Van Loon, H., and Meehl, G. A.: Interactions between externally forced climate signals from  
874 sunspot peaks and the internally generated Pacific Decadal and North Atlantic  
875 Oscillations, *Geophys. Res. Lett.*, 41, 161–166, doi:10.1002/2013GL058670, 2014.
- 876 Velasco, V. M., and Mendoza B. : Assessing the relationship between solar activity and some  
877 large scale climatic phenomena. *Advances in Space Research* 42, no. 5, 866-878, 2008.
- 878 Versteegh, G.J.M.: Solar forcing of climate. 2: Evidence from the past. *Space Sci. Rev.* 120,  
879 243–286, 2005.
- 880 Vlasov, A., Kauristie, K., Kamp, M., Luntama, J.P. and Pogoreltsev, A.: A study of traveling  
881 ionospheric disturbances and atmospheric gravity waves using EISCAT Svalbard Radar  
882 IPY-data. *Annales Geophysicae*, 29, No. 11, 2101-2116). Copernicus GmbH, 2011.
- 883 Von Storch H.V. and Zwiers F. W.: *Statistical Analysis in Climate Research*. Cambridge  
884 University Press, 484, 1999.
- 885 Wang, J. S., and Zhao, L.: Statistical tests for a correlation between decadal variation in June  
886 precipitation in China and sunspot number, *J. Geophys. Res.*, 117, D23117,  
887 doi:10.1029/2012JD018074, 2012.

888 Zanchettin, D., Rubino, A., Traverso, P., and Tomasino, M. : Impact of variations in solar  
 889 activity on hydrological decadal patterns in northern Italy, *J. Geophys. Res.*, 113, D12102,  
 890 doi: 10.1029/2007JD009157, 2008.

891 Zwiers, F. W., and von Storch H: Taking Serial Correlation into Account in Tests of the  
 892 Mean. *J. Climate*, 8, 336-351, 1995

893  
 894  
 895  
 896  
 897  
 898  
 899

Table 1. Correlation coefficient between first principal component (PC1)  
 for the precipitation and atmospheric indices NAO and GBO, during winter

| Period    | NAOI         | GBOI        |
|-----------|--------------|-------------|
| 1916-1957 | -0.36        | <b>0.75</b> |
| 1958-1999 | <b>-0.43</b> | <b>0.84</b> |

900  
 901  
 902  
 903  
 904  
 905  
 906

Table 2. Simultaneous correlation (1901-2000) with confidence level (CL) at least 95%, for unfiltered (UF) data, terrestrial variables filtered by low pass filter (LPF) and both time series correlated, smoothed by band pass filtered and the band is specified in the brackets.  $r$ - Pearson correlation coefficient,  $t$ - the values of test  $t$ ,  $\tau$  - Kendall correlation coefficient,  $p$  - significance p-level,  $N_{eff}$  is the effective number.

| <i>Variable</i>                     | <i>Season</i> | $r$           | $t$          | $\tau$        | $p$          | $N_{eff}$ | $CL$          |
|-------------------------------------|---------------|---------------|--------------|---------------|--------------|-----------|---------------|
| <i>Correlation with aa</i>          |               |               |              |               |              |           |               |
| <b>PC1_TT(UF)</b>                   | <b>Spring</b> | <b>0.224</b>  | <b>2.184</b> | <b>0.137</b>  | <b>0.043</b> | <b>92</b> | <b>95%</b>    |
| <b>PC1_TT(4-8)</b>                  | <b>Spring</b> | <b>0.606</b>  | <b>6.457</b> | <b>0.401</b>  | <b>0.000</b> | <b>74</b> | <b>99.5%</b>  |
| <b>PC1_TT(UF)</b>                   | <b>Summer</b> | <b>0.310</b>  | <b>2.663</b> | <b>0.206</b>  | <b>0.002</b> | <b>69</b> | <b>99%</b>    |
| <b>PC1_TT(LPF)</b>                  | <b>Summer</b> | <b>0.345</b>  | <b>2.037</b> | <b>0.210</b>  | <b>0.002</b> | <b>33</b> | <b>95%</b>    |
| <b>PC1_TT(9-15)</b>                 | <b>Summer</b> | <b>0.796</b>  | <b>5.130</b> | <b>0.570</b>  | <b>0.000</b> | <b>17</b> | <b>99.5%</b>  |
| PC1_TT(LPF)                         | Fall          | 0.453         | 2.865        | 0.304         | 0.000        | 34        | 99%           |
| <b>PC1_PP(LPF)</b>                  | <b>Spring</b> | <b>-0.371</b> | <b>2.201</b> | <b>-0.315</b> | <b>0.000</b> | <b>32</b> | <b>95%</b>    |
| <b>PC1_PP(9-15)</b>                 | <b>Spring</b> | <b>-0.669</b> | <b>3.437</b> | <b>-0.501</b> | <b>0.000</b> | <b>17</b> | <b>99.5%</b>  |
| PC1_PP(9-15)                        | Summer        | -0.721        | 3.910        | -0.523        | 0.000        | 16        | 99.5%         |
| TPPI(LPF)                           | Fall          | 0.452         | 2.869        | 0.310         | 0.000        | 34        | 99%           |
| <b>TPPI(UF)</b>                     | <b>Spring</b> | <b>0.275</b>  | <b>2.676</b> | <b>0.186</b>  | <b>0.006</b> | <b>90</b> | <b>99%</b>    |
| <b>TPPI(LPF)</b>                    | <b>Spring</b> | <b>0.299</b>  | <b>1.736</b> | <b>0.261</b>  | <b>0.000</b> | <b>33</b> | <b>90%</b>    |
| <b>TPPI(4-8)</b>                    | <b>Spring</b> | <b>0.525</b>  | <b>5.313</b> | <b>0.338</b>  | <b>0.000</b> | <b>76</b> | <b>99.5%</b>  |
| <b>TPPI(9-15)</b>                   | <b>Spring</b> | <b>0.402</b>  | <b>1.660</b> | <b>0.325</b>  | <b>0.000</b> | <b>16</b> | <b>85-90%</b> |
| <b>TPPI(UF)</b>                     | <b>Summer</b> | <b>0.224</b>  | <b>2.121</b> | <b>0.153</b>  | <b>0.025</b> | <b>87</b> | <b>95%</b>    |
| <b>TPPI(LPF)</b>                    | <b>Summer</b> | <b>0.318</b>  | <b>1.921</b> | <b>0.187</b>  | <b>0.006</b> | <b>35</b> | <b>~95%</b>   |
| <b>TPPI(9-15)</b>                   | <b>Summer</b> | <b>0.787</b>  | <b>4.856</b> | <b>0.572</b>  | <b>0.000</b> | <b>16</b> | <b>99.5%</b>  |
| <b>ORS_Q(LPF)</b>                   | <b>Fall</b>   | <b>-0.324</b> | <b>1.946</b> | <b>-0.210</b> | <b>0.002</b> | <b>34</b> | <b>~95%</b>   |
| <b>ORS_Q(9-15)</b>                  | <b>Fall</b>   | <b>-0.562</b> | <b>2.454</b> | <b>-0.419</b> | <b>0.000</b> | <b>15</b> | <b>95-98%</b> |
| ORS_Q(9-15)                         | Summer        | -0.656        | 3.210        | -0.470        | 0.000        | 16        | 99%           |
| <i>Correlation with Wolf number</i> |               |               |              |               |              |           |               |
| PC1_TT(4-8)                         | Summer        | 0.288         | 2.453        | 0.157         | 0.021        | 68        | 98%           |
| PC1_TT(9-15)                        | Fall          | 0.699         | 3.770        | 0.550         | 0.000        | 17        | 99.5%         |
| <b>PC1_PP(4-8)</b>                  | <b>Spring</b> | <b>-0.242</b> | <b>2.133</b> | <b>-0.190</b> | <b>0.005</b> | <b>75</b> | <b>95-98%</b> |
| <b>PC1_PP(9-15)</b>                 | <b>Spring</b> | <b>-0.538</b> | <b>2.417</b> | <b>-0.363</b> | <b>0.000</b> | <b>16</b> | <b>95-98%</b> |
| PC1_PP(4-8)                         | Winter        | -0.370        | 3.298        | -0.265        | 0.000        | 70        | >99%          |

|                   |               |              |              |              |              |           |               |
|-------------------|---------------|--------------|--------------|--------------|--------------|-----------|---------------|
| <b>TPPI(UF)</b>   | <b>Spring</b> | <b>0.211</b> | <b>1.973</b> | <b>0.148</b> | <b>0.029</b> | <b>85</b> | <b>95%</b>    |
| <b>TPPI(LPF)</b>  | <b>Spring</b> | <b>0.299</b> | <b>1.736</b> | <b>0.261</b> | <b>0.000</b> | <b>33</b> | <b>90%</b>    |
| <b>TPPI(4-8)</b>  | <b>Spring</b> | <b>0.245</b> | <b>2.154</b> | <b>0.159</b> | <b>0.019</b> | <b>74</b> | <b>95-98%</b> |
| <b>TPPI(9-15)</b> | <b>Spring</b> | <b>0.585</b> | <b>2.708</b> | <b>0.395</b> | <b>0.000</b> | <b>16</b> | <b>98%</b>    |
| TPPI(9-15)        | Fall          | 0.673        | 3.796        | 0.553        | 0.000        | 19        | 99%           |
| GBOI (4-8)        | Summer        | -0.346       | 2.982        | -0.230       | 0.001        | 67        | 99.5%         |
| GBOI (4-8)        | Winter        | -0.343       | 3.169        | -0.218       | 0.001        | 77        | >99%          |
| GBOI (17-28)      | Fall          | -0.899       | 3.485        | -0.707       | 0.000        | 5         | 95-98%        |
| ORS_Q (4-8)       | Winter        | -0.263       | 2.329        | -0.163       | 0.016        | 75        | 98%           |

907  
908  
909

Table 3. Same as Table 2 but for 53 years (1948-2000).

| <i>Variable</i>                      | <i>Season</i> | <i>r</i>      | <i>t</i>     | $\tau$        | <i>p</i>     | <i>N<sub>eff</sub></i> | <i>CL</i>      |
|--------------------------------------|---------------|---------------|--------------|---------------|--------------|------------------------|----------------|
| <i>Correlation with aa</i>           |               |               |              |               |              |                        |                |
| <b>EBI (UF)</b>                      | <b>Spring</b> | <b>0.259</b>  | <b>1.836</b> | <b>0.151</b>  | <b>0.110</b> | <b>49</b>              | <b>~95%</b>    |
| <b>EBI (4-8)</b>                     | <b>Spring</b> | <b>0.528</b>  | <b>3.864</b> | <b>0.382</b>  | <b>0.000</b> | <b>41</b>              | <b>&gt;99%</b> |
| ABI (UF)                             | Fall          | -0.257        | 1.848        | -0.118        | 0.210        | 51                     | ~95%           |
| ABI (9-15)                           | Spring        | 0.605         | 2.157        | 0.426         | 0.000        | 10                     | >95%           |
| AEBI (9-15)                          | Winter        | 0.749         | 3.134        | 0.589         | 0.000        | 10                     | 98.5%          |
| <i>Correlation with flux 10.7 cm</i> |               |               |              |               |              |                        |                |
| TPPI(LPF)                            | Spring        | 0.444         | 1.502        | 0.322         | 0.001        | 11                     | 85-90%         |
| ABI(4-8)                             | Fall          | 0.578         | 4.124        | 0.312         | 0.001        | 36                     | 99.9%          |
| AEBI(4-8)                            | Fall          | 0.530         | 3.697        | 0.360         | 0.000        | 37                     | 99.9%          |
| <b>EBI (4-8)</b>                     | <b>Winter</b> | <b>0.419</b>  | <b>2.678</b> | <b>0.272</b>  | <b>0.004</b> | <b>37</b>              | <b>98.5%</b>   |
| <b>ORS_Q(4-8)</b>                    | <b>Winter</b> | <b>-0.603</b> | <b>4.390</b> | <b>-0.351</b> | <b>0.000</b> | <b>36</b>              | <b>99.9%</b>   |
| <b>GBOI (4-8)</b>                    | <b>Winter</b> | <b>-0.695</b> | <b>6.034</b> | <b>-0.428</b> | <b>0.000</b> | <b>41</b>              | <b>99.9%</b>   |

910

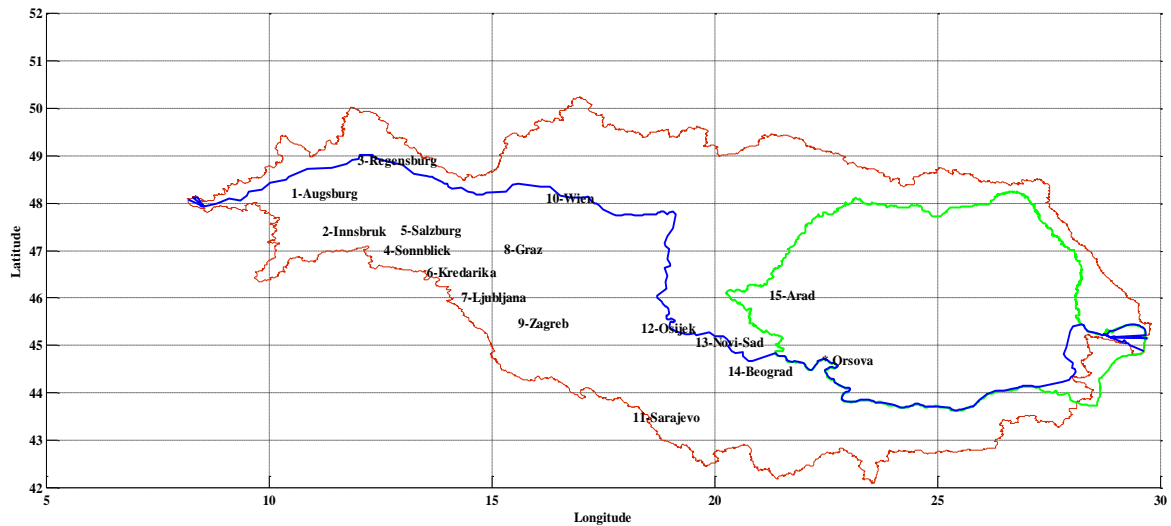

911  
912  
913

Figure 1. Localization of 15 precipitation stations situated upstream of Orsova station.

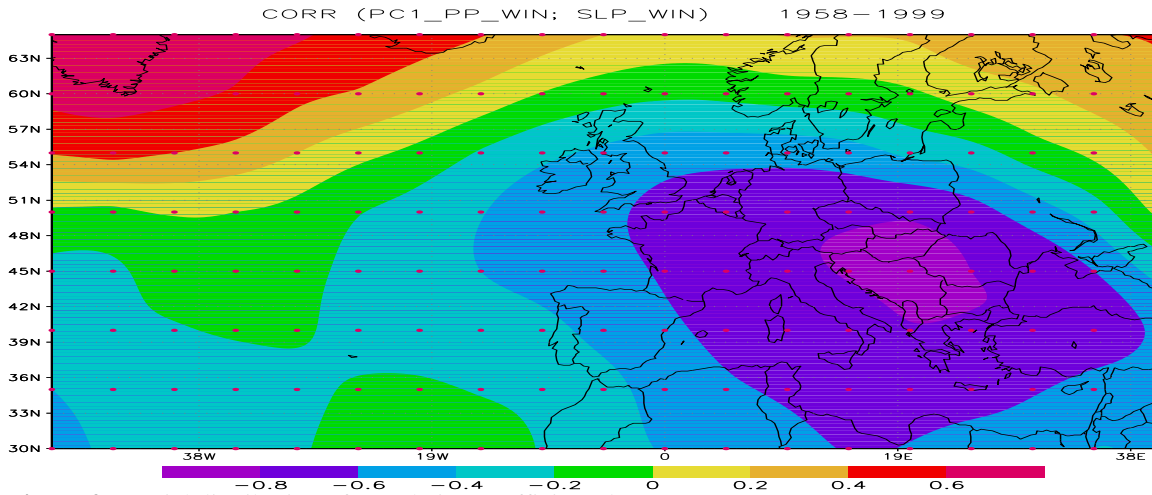

914  
915  
916  
917

**Figure 2.** Spatial distribution of correlation coefficients between SLP NCAR and observed PC1-PP during winter for 1958-1999.

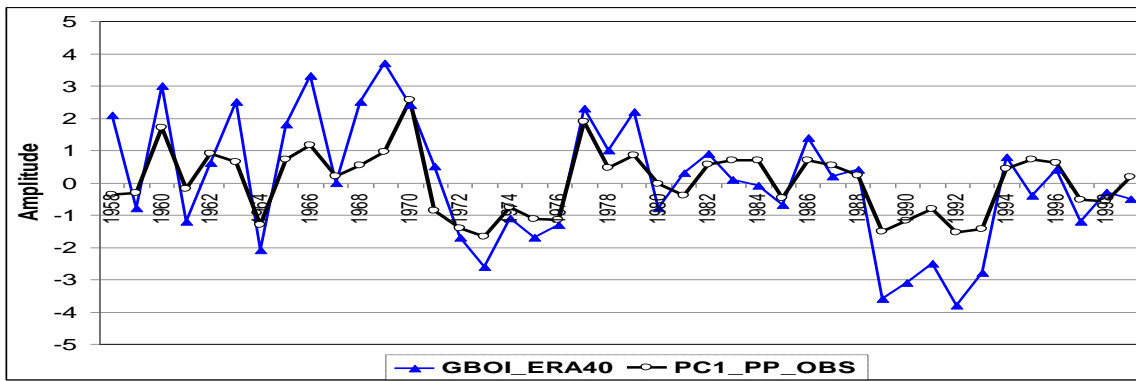

918  
919  
920

**Figure 3.** Winter precipitation PC1 versus winter GBOI for 1958-1999 ( $R=0.84$ ).

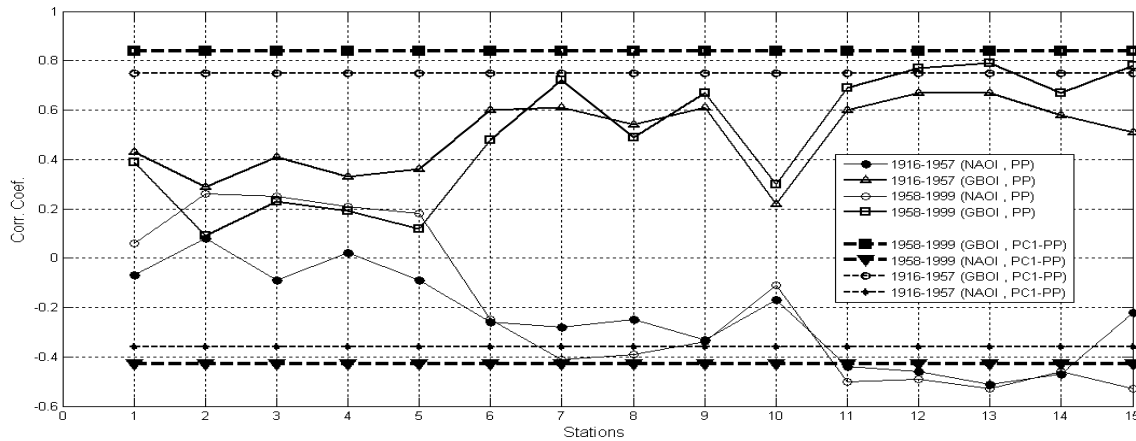

921  
922  
923  
924  
925

**Figure 4.** Correlation coefficients between winter precipitation at 15 stations and NAOI and GBOI for two periods: a) 1916-1957; b) 1958-1999. The correlations between PC1-PP and two indices are marked by horizontal lines.

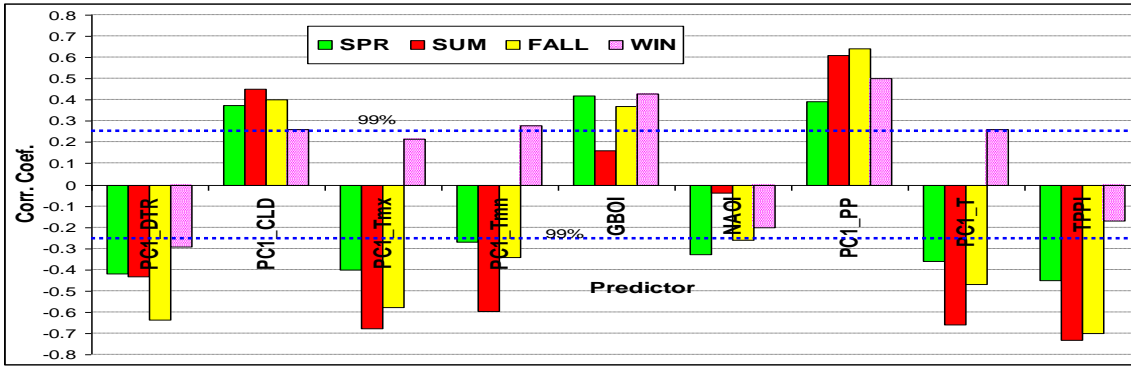

926  
927  
928  
929  
930  
931

**Figure 5.** Simultaneous correlations (1901-2000) between Danube discharge at Orsova and nine predictors: diurnal temperature range (DTR), cloud cover (CLD), maximum and minimum temperatures (Tmx, Tmn), atmospheric indices GBOI and NAOI, precipitation (PP), mean temperature (T) and drought index (TPPI). PC1 represents the first principal components of the respective fields.

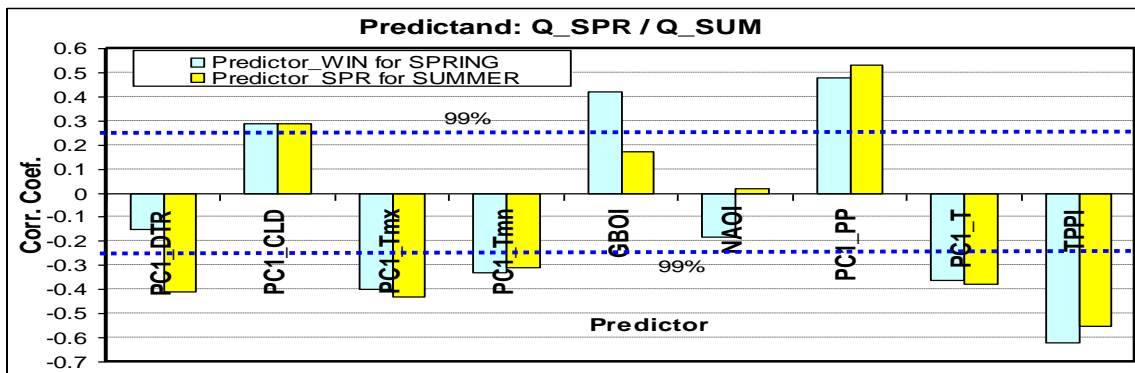

932  
933  
934  
935

**Figure 6.** The correlation between Orsova discharge (Q) in the spring / summer and the nine predictors in the winter/spring.

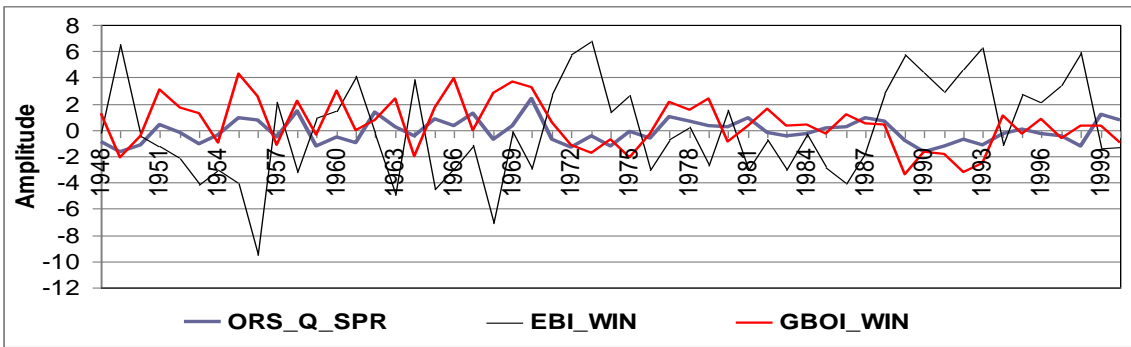

936  
937  
938  
939  
940

**Figure 7.** Spring Orsova discharge (standardized) versus winter European blocking index ( $R = -0.54$ ) and winter GBOI ( $R = 0.53$ ) for the period 1948-2000.

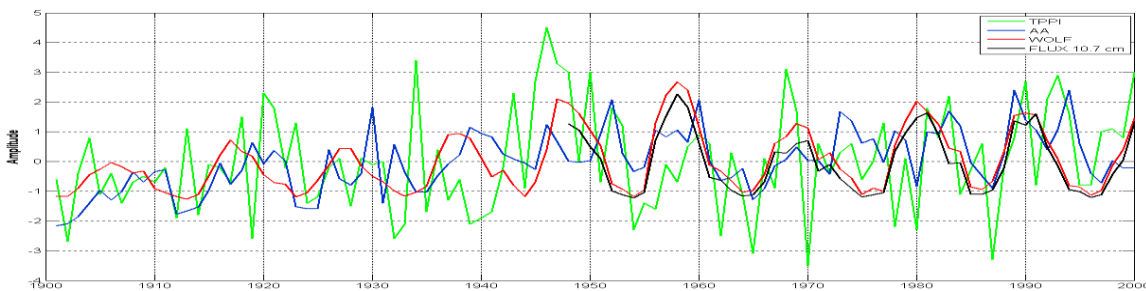

941  
942  
943  
944

**Figure 8.** Unfiltered spring time series of Wolf number, *aa*, and TPPI for the period 1901-2000 and solar flux since 1948. The time series are standardized except for TPPI.

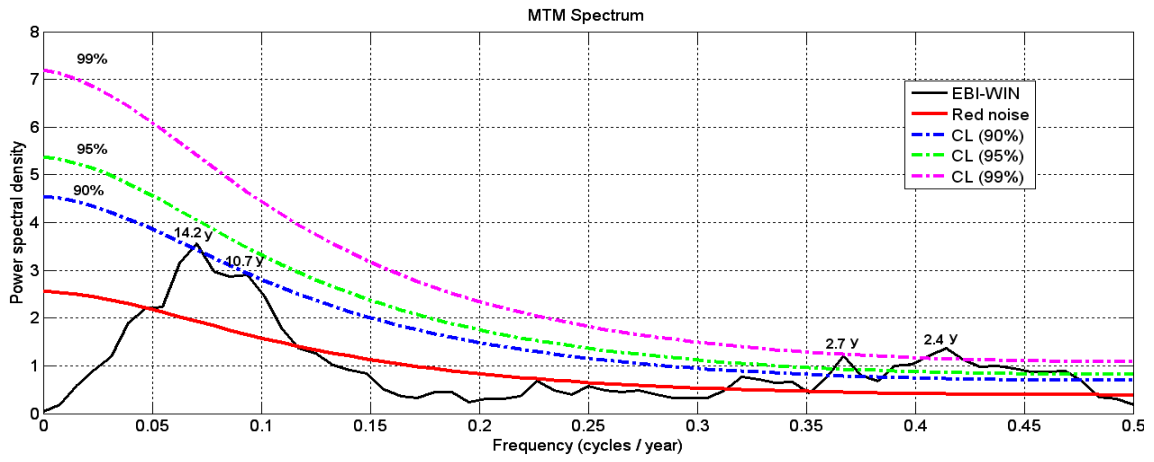

945 a)

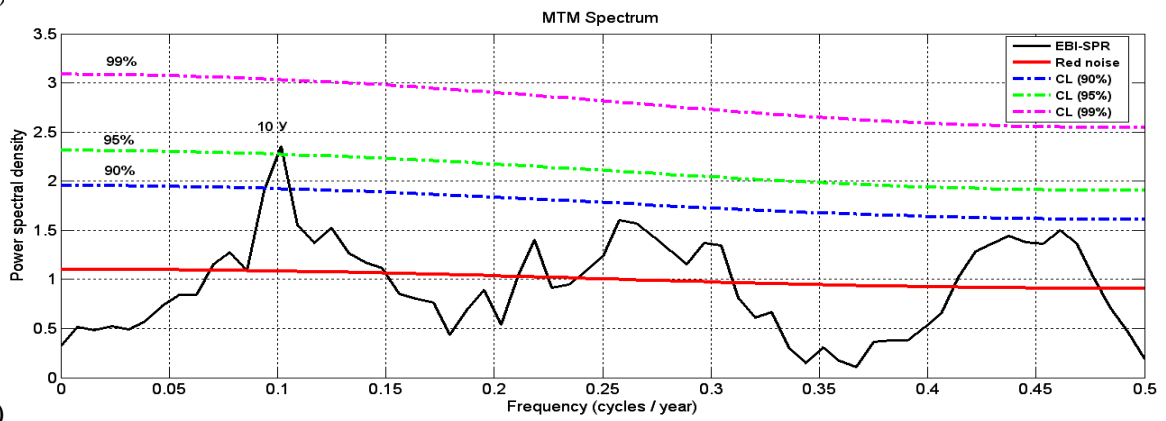

946 b)

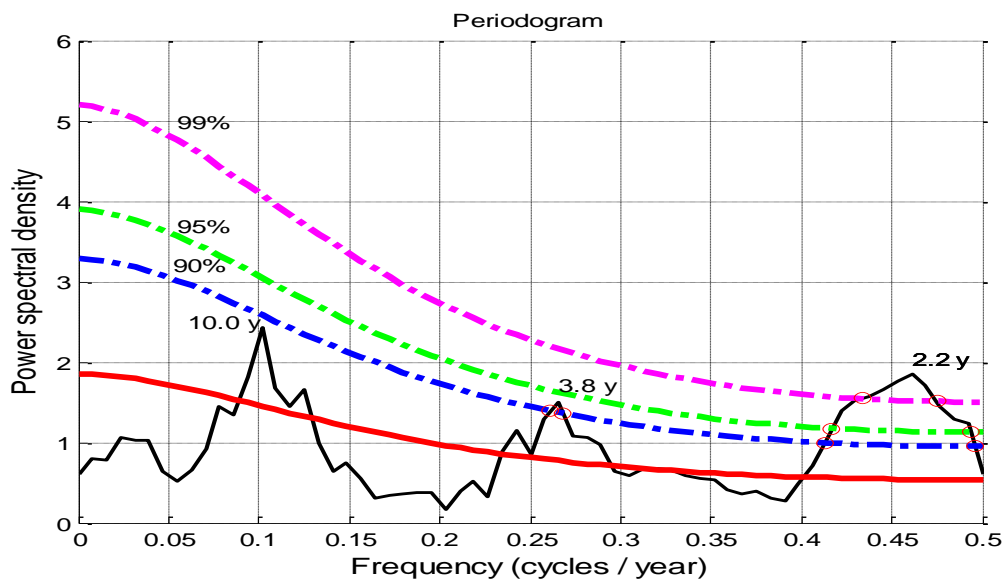

947 c)

**Figure 9.** Power spectra for the blocking indices: winter EBI (a), spring EBI (b) and spring AEBI (c).

948

949

950

951

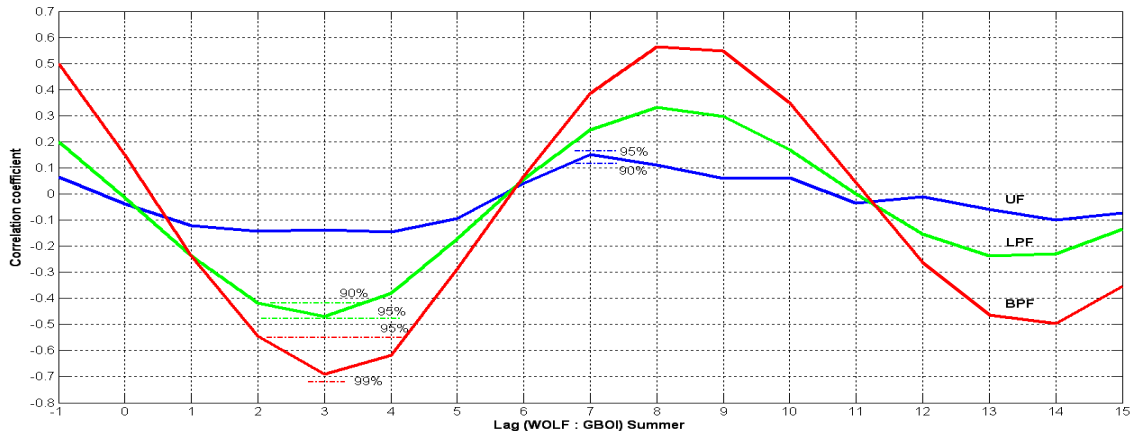

952  
953  
954  
955  
956  
957

**Figure 10.** Correlation coefficients, between Wolf number and GBOI in summer with the lags between -1 and 15 yr, for three time series: unfiltered (UF), smoothing by low pass filter (LPF) and by band pass filter (9-15). The Wolf number is considered before GBOI, from 1 to 15yr.

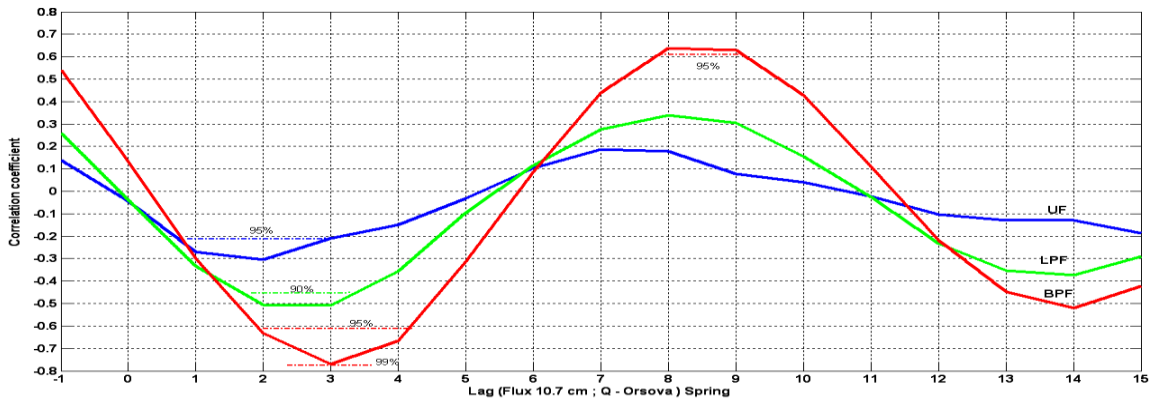

958  
959

a)

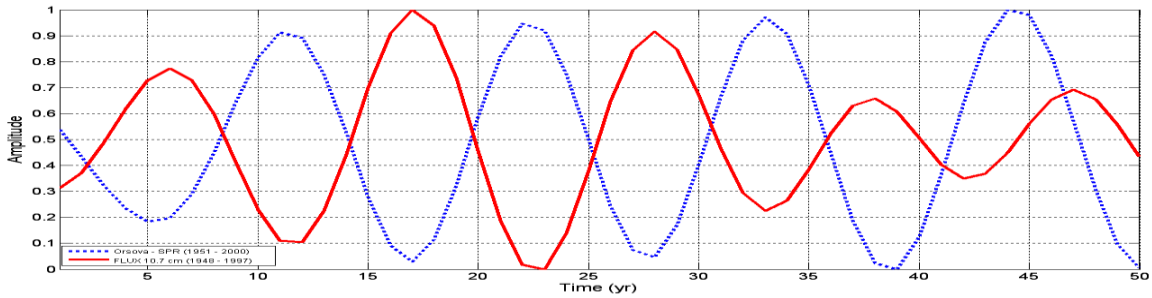

960  
961

b)

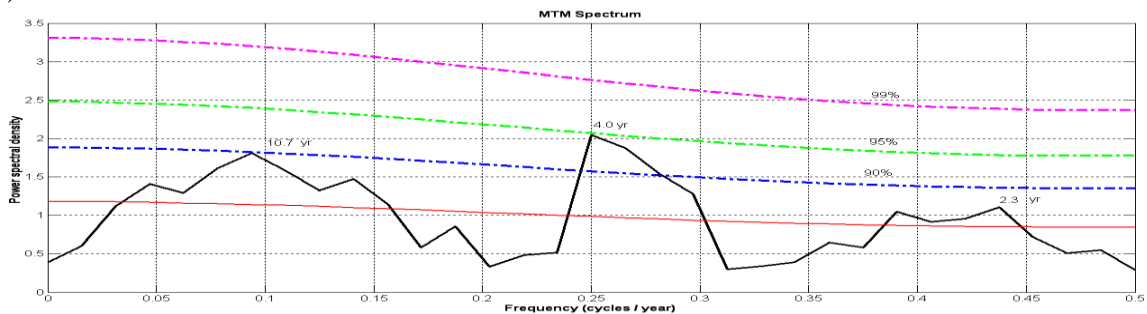

962  
963

c)

**Figure 11.** The test of a possible association between solar (Flux 10.7cm) and the Orsova discharge (ORS\_Q), during spring (1948-2000).

964  
965  
966



- 967 a) Correlation coefficients, between solar flux and Orsova discharge with the lags from -1 to 15 yr, for  
 968 three time series: unfiltered (UF), smoothing by low pass filter (LPF) and by band pass filter (9-15);  
 969 b) Temporal behavior of the solar flux and ORS\_Q, filtered (9-15) with a delay of 3 years to flux. The time  
 970 series are normalized.  
 971 c) Power spectra for spring discharge at Orsova. The time series is unfiltered.  
 972

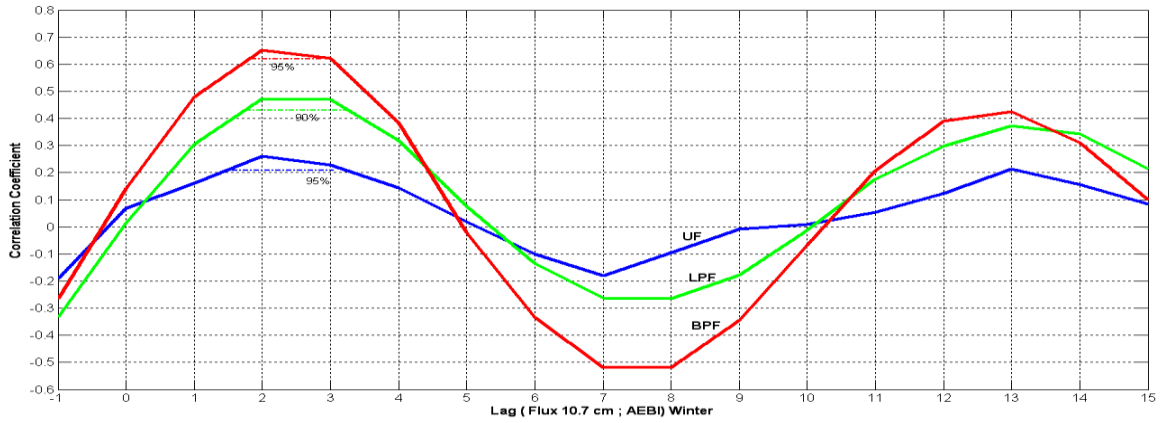

973 **Figure 12.** Correlation coefficients, between solar flux and AEBI with the lags between -1 and to 15yr,  
 974 during winter (1948-2000), for three time series: unfiltered (UF), smoothing by low pass filter (LPF)  
 975 and by band pass filter (9-15).  
 976  
 977

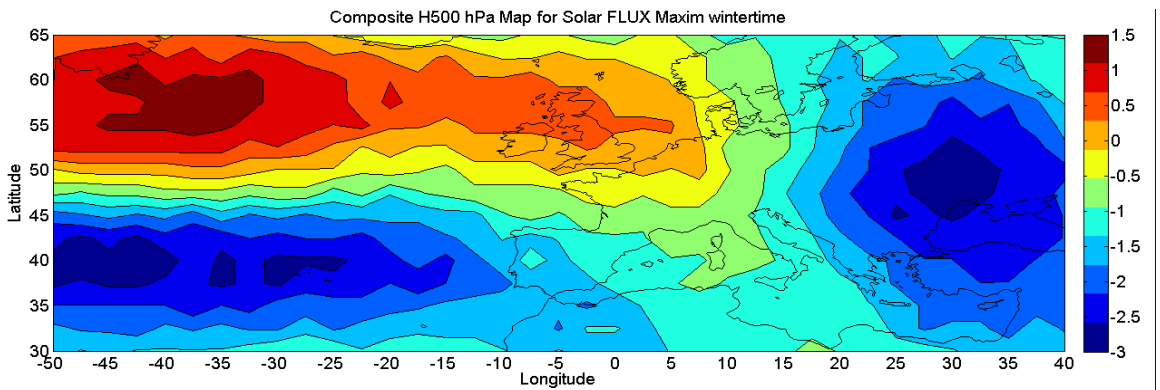

978  
 979

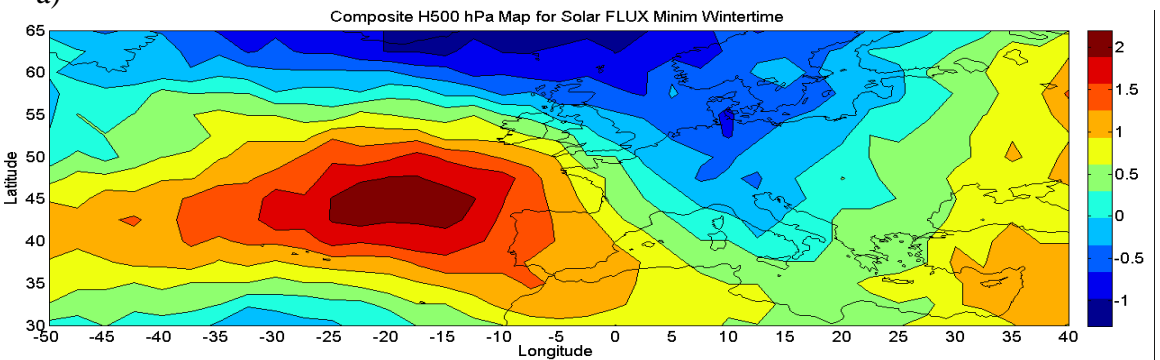

980 **Figure 13.** Composite maps for the winter H500 hPa anomalies, corresponding to solar flux associated with the  
 981 east phase of QBO (1948-2000) and: a) maximum flux b) minimum flux  
 982  
 983
